# Supplementary material for: Natural nitric oxide (NO) inhibitors from Aristolochia mollissima
Source: Royal Society of Chemistry journal article supplement (doi:10.1039/c4ra09612f), 2014-01-01
Supplement: c4ra09612f1.pdf [file c4ra09612f1.pdf]

# Electronic Supplementary Information

## Natural Nitric Oxide (NO) inhibitors from *Aristolochia mollissima*

Zhen Dong,<sup>‡ a</sup> Qiong Gu,<sup>‡ a</sup> Bao Cheng,<sup>b</sup> Zhong-Bin Cheng,<sup>a</sup> Gui-Hua Tang,<sup>a</sup> Zhang-Hua Sun,<sup>a</sup> Jun-Sheng Zhang,<sup>a</sup> Jing-Mei Bao,<sup>a</sup> and Sheng Yin<sup>\*a</sup>

<sup>a</sup>Guangdong Provincial Key Laboratory of New Drug Design and Evaluation, School of Pharmaceutical Sciences, Sun Yat-sen University, Guangzhou, Guangdong 510006, P. R. China

<sup>b</sup>Institute of Chinese Medical Sciences, Guangdong Pharmaceutical University, Guangzhou, Guangdong 510006, P. R. China

E-mail: [yinsh2@mail.sysu.edu.cn](mailto:yinsh2@mail.sysu.edu.cn); Fax: +86-20-39943090; Tel: +86-20-39943090.

### Contents:

- S1 <sup>1</sup>H NMR Spectrum of **1** in CDCl<sub>3</sub>
- S2 <sup>13</sup>C NMR Spectra of **1** in CDCl<sub>3</sub>
- S3 <sup>1</sup>H-<sup>1</sup>H COSY Spectrum of **1** in CDCl<sub>3</sub>
- S4 HSQC Spectrum of **1** in CDCl<sub>3</sub>
- S5 HMBC Spectrum of **1** in CDCl<sub>3</sub>
- S6 NOESY Spectrum of **1** in CDCl<sub>3</sub>

---

<sup>‡</sup> These authors have contributed equally to this work.

- S7**  $^1\text{H}$  NMR Spectrum of **2** in  $\text{CDCl}_3$
- S8**  $^{13}\text{C}$  NMR Spectra of **2** in  $\text{CDCl}_3$
- S9**  $^1\text{H}$ - $^1\text{H}$  COSY Spectrum of **2** in  $\text{CDCl}_3$
- S10** HSQC Spectrum of **2** in  $\text{CDCl}_3$
- S11** HMBC Spectrum of **2** in  $\text{CDCl}_3$
- S12**  $^1\text{H}$  NMR Spectrum of **2** in  $\text{C}_5\text{D}_5\text{N}$
- S13**  $^{13}\text{C}$  NMR Spectra of **2** in  $\text{C}_5\text{D}_5\text{N}$
- S14**  $^1\text{H}$ - $^1\text{H}$  COSY Spectrum of **2** in  $\text{C}_5\text{D}_5\text{N}$
- S15** HSQC Spectrum of **2** in  $\text{C}_5\text{D}_5\text{N}$
- S16** HMBC Spectrum of **2** in  $\text{C}_5\text{D}_5\text{N}$
- S17** NOESY Spectrum of **2** in  $\text{C}_5\text{D}_5\text{N}$
- S18**  $^1\text{H}$  NMR Spectrum of **3** in  $\text{CDCl}_3$
- S19**  $^{13}\text{C}$  NMR Spectra of **3** in  $\text{CDCl}_3$
- S20**  $^1\text{H}$ - $^1\text{H}$  COSY Spectrum of **3** in  $\text{CDCl}_3$
- S21** HSQC Spectrum of **3** in  $\text{CDCl}_3$
- S22** HMBC Spectrum of **3** in  $\text{CDCl}_3$
- S23** NOESY Spectrum of **3** in  $\text{CDCl}_3$
- S24**  $^1\text{H}$  NMR Spectrum of **4** in  $\text{CDCl}_3$
- S25**  $^{13}\text{C}$  NMR Spectra of **4** in  $\text{CDCl}_3$
- S26**  $^1\text{H}$ - $^1\text{H}$  COSY Spectrum of **4** in  $\text{CDCl}_3$
- S27** HSQC Spectrum of **4** in  $\text{CDCl}_3$
- S28** HMBC Spectrum of **4** in  $\text{CDCl}_3$

- S29** NOESY Spectrum of **4** in CDCl<sub>3</sub>
- S30** <sup>1</sup>H NMR Spectrum of **5** in CDCl<sub>3</sub>
- S31** <sup>13</sup>C NMR Spectra of **5** in CDCl<sub>3</sub>
- S32** <sup>1</sup>H-<sup>1</sup>H COSY Spectrum of **5** in CDCl<sub>3</sub>
- S33** HSQC Spectrum of **5** in CDCl<sub>3</sub>
- S34** HMBC Spectrum of **5** in CDCl<sub>3</sub>
- S35** NOESY Spectrum of **5** in CDCl<sub>3</sub>
- S36** <sup>1</sup>H NMR Spectrum of **6** in CDCl<sub>3</sub>
- S37** <sup>13</sup>C NMR Spectra of **6** in CDCl<sub>3</sub>
- S38** <sup>1</sup>H-<sup>1</sup>H COSY Spectrum of **6** in CDCl<sub>3</sub>
- S39** HSQC Spectrum of **6** in CDCl<sub>3</sub>
- S40** HMBC Spectrum of **6** in CDCl<sub>3</sub>
- S41** NOESY Spectrum of **6** in CDCl<sub>3</sub>
- S42** <sup>1</sup>H NMR Spectrum of **7** in CDCl<sub>3</sub>
- S43** <sup>1</sup>H NMR Spectrum of **8** in CDCl<sub>3</sub>
- S44** <sup>1</sup>H NMR Spectrum of **9** in CDCl<sub>3</sub>
- S45** <sup>1</sup>H NMR Spectrum of **10** in CDCl<sub>3</sub>
- S46** <sup>1</sup>H NMR Spectrum of **11** in CDCl<sub>3</sub>
- S47** <sup>1</sup>H NMR Spectrum of **12** in CDCl<sub>3</sub>
- S48** <sup>1</sup>H NMR Spectrum of **13** in CDCl<sub>3</sub>
- S49** <sup>1</sup>H NMR Spectrum of **14** in CDCl<sub>3</sub>
- S50** <sup>1</sup>H NMR Spectrum of **15** in CDCl<sub>3</sub>

- S51**  $^1\text{H}$  NMR Spectrum of **16** in  $\text{CDCl}_3$
- S52**  $^1\text{H}$  NMR Spectrum of **17** in  $\text{CDCl}_3$
- S53**  $^1\text{H}$  NMR Spectrum of **18** in  $\text{CDCl}_3$
- S54**  $^1\text{H}$  NMR Spectrum of **19** in  $\text{CDCl}_3$
- S55**  $^1\text{H}$  NMR Spectrum of **20** in  $\text{CDCl}_3$
- S56**  $^1\text{H}$  NMR Spectrum of **21** in  $\text{CDCl}_3$
- S57**  $^1\text{H}$  NMR Spectrum of **22** in  $\text{CDCl}_3$
- S58**  $^1\text{H}$  NMR Spectrum of **23** in  $\text{CDCl}_3$
- S59**  $^1\text{H}$  NMR Spectrum of **24** in  $\text{CDCl}_3$
- S60**  $^1\text{H}$  NMR Spectrum of **25** in  $\text{CDCl}_3$
- S61**  $^1\text{H}$  NMR Spectrum of **26** in  $\text{CDCl}_3$
- S62**  $^1\text{H}$  NMR Spectrum of **27** in  $\text{CDCl}_3$
- S63**  $^1\text{H}$  NMR Spectrum of **28** in  $\text{CDCl}_3$
- S64**  $^1\text{H}$  NMR Spectrum of **29** in  $\text{CDCl}_3$
- S65**  $^1\text{H}$  NMR Spectrum of **30** in  $\text{CDCl}_3$
- S66** Detail information for ECD calculations

S1 <sup>1</sup>H NMR Spectrum of **1** in CDCl<sub>3</sub>

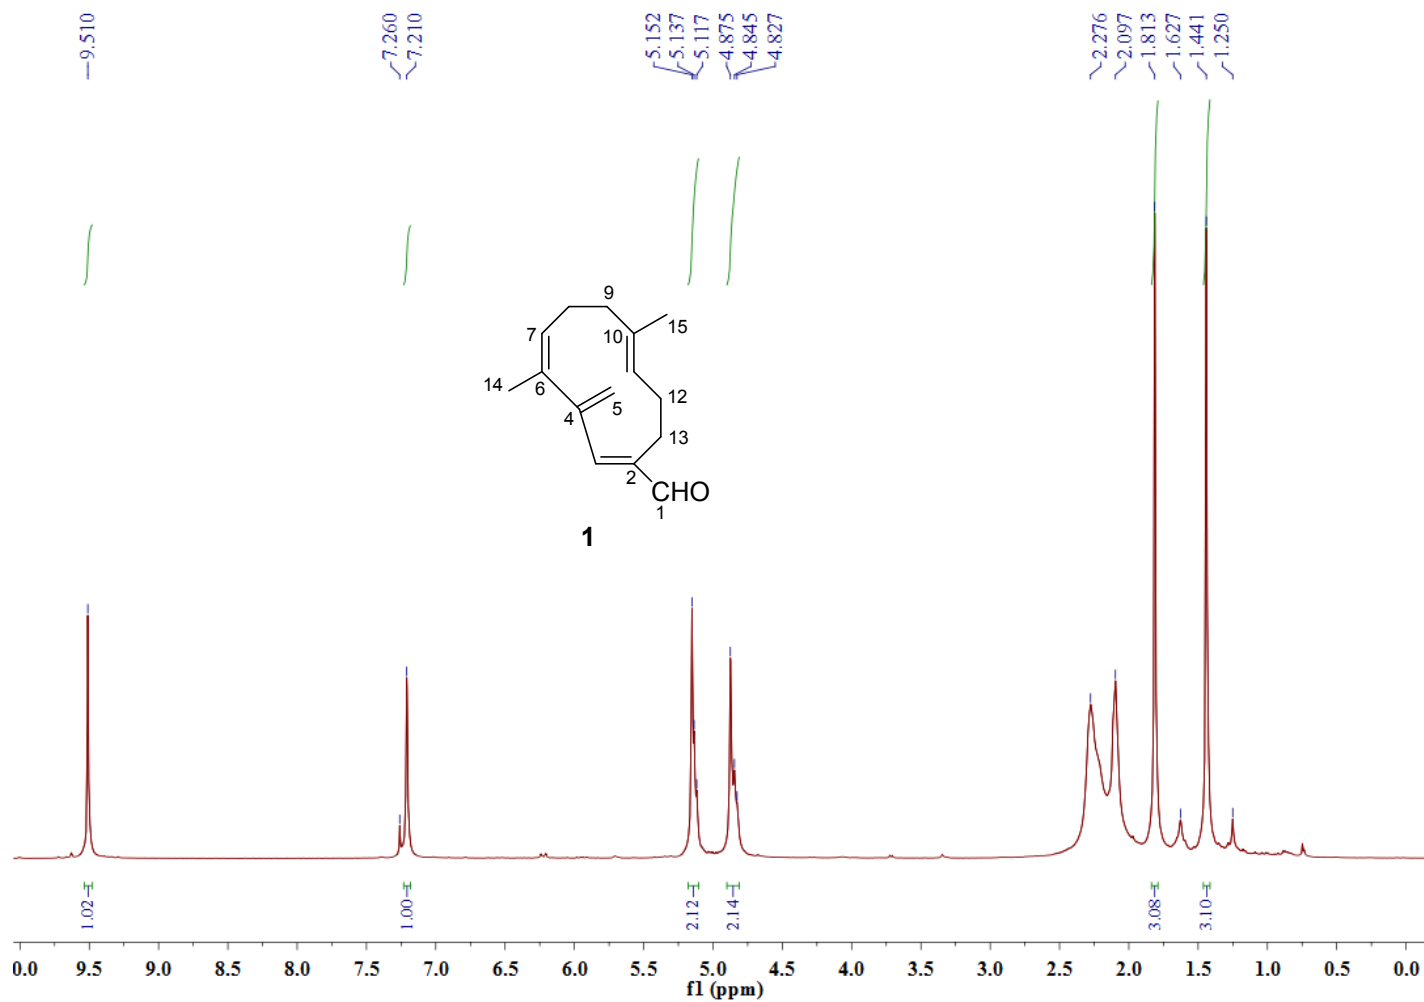

S2 <sup>13</sup>C NMR Spectra of **1** in CDCl<sub>3</sub>

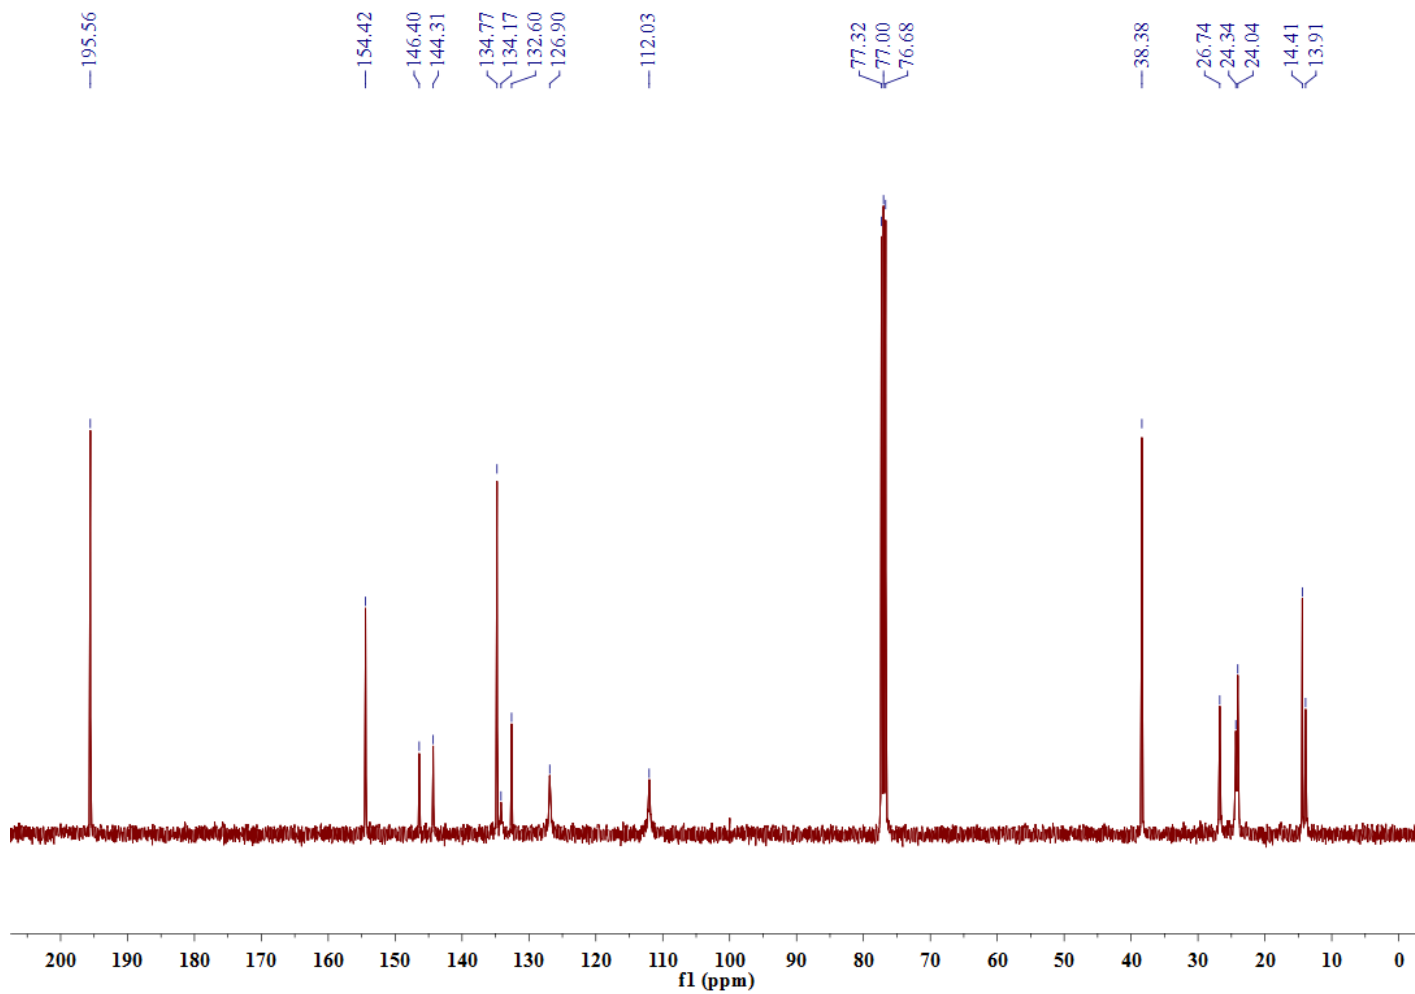

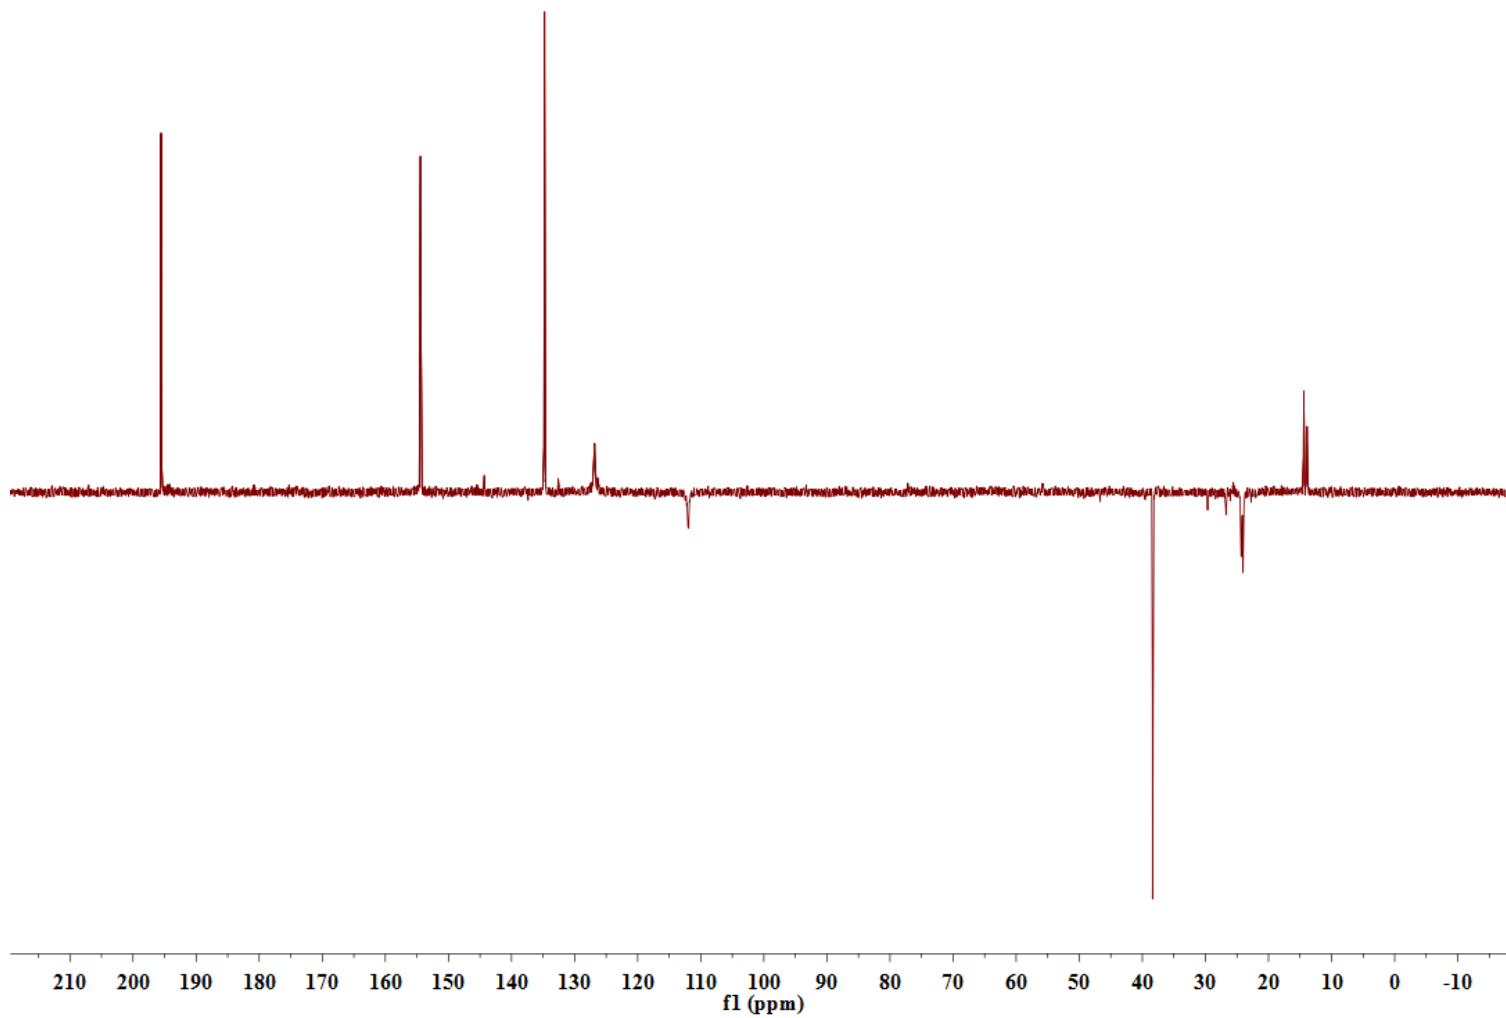

S3  $^1\text{H}$ - $^1\text{H}$  COSY Spectrum of **1** in  $\text{CDCl}_3$

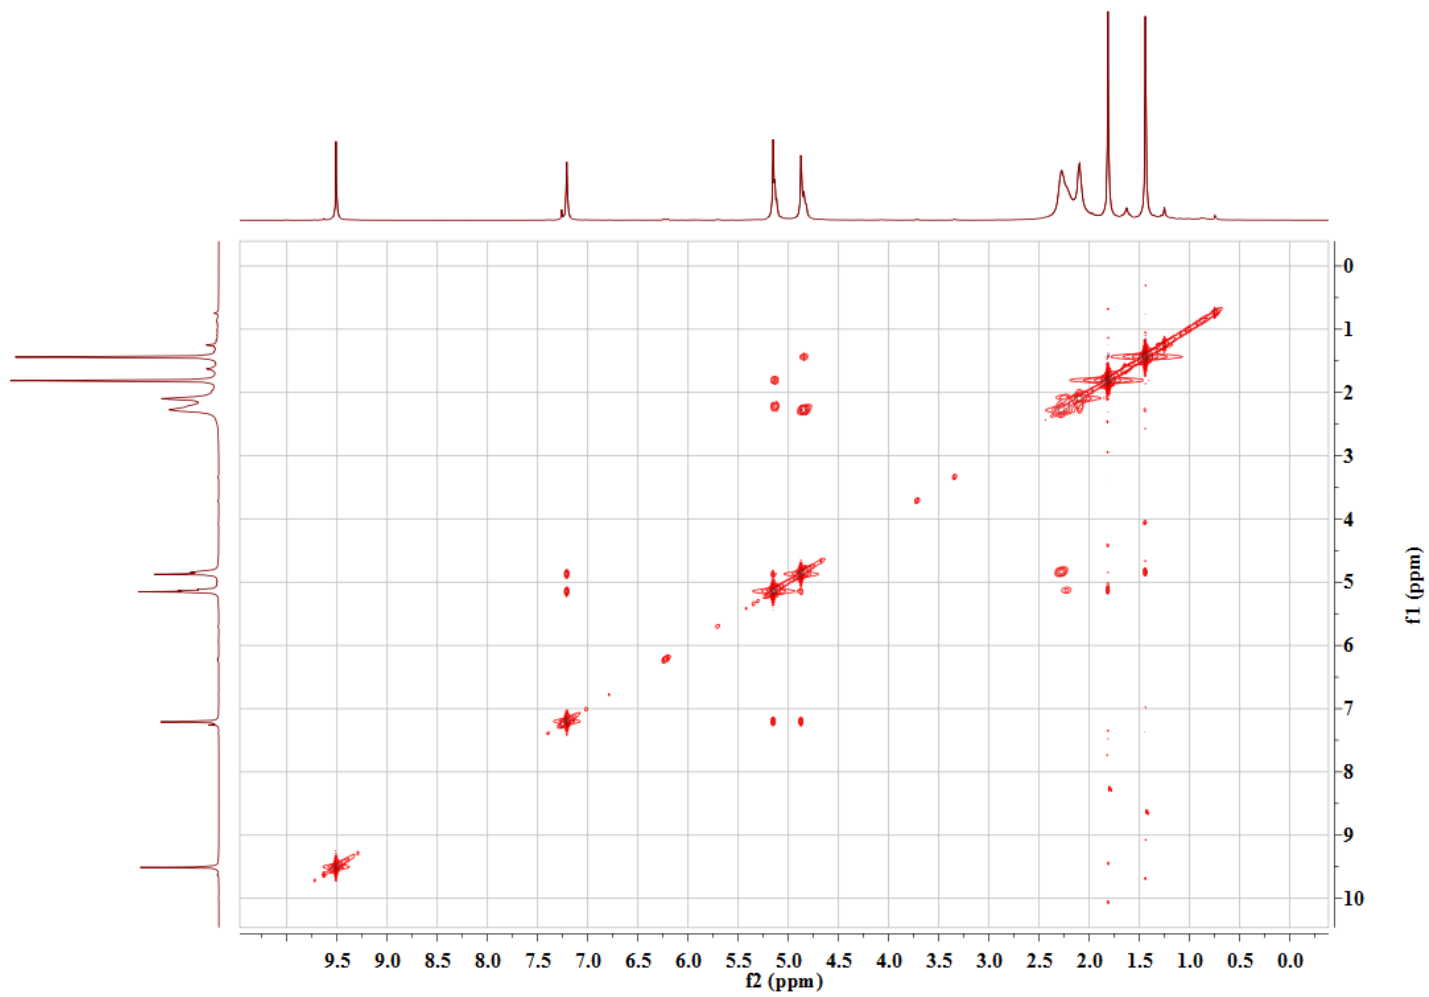



S4 HSQC Spectrum of **1** in CDCl<sub>3</sub>

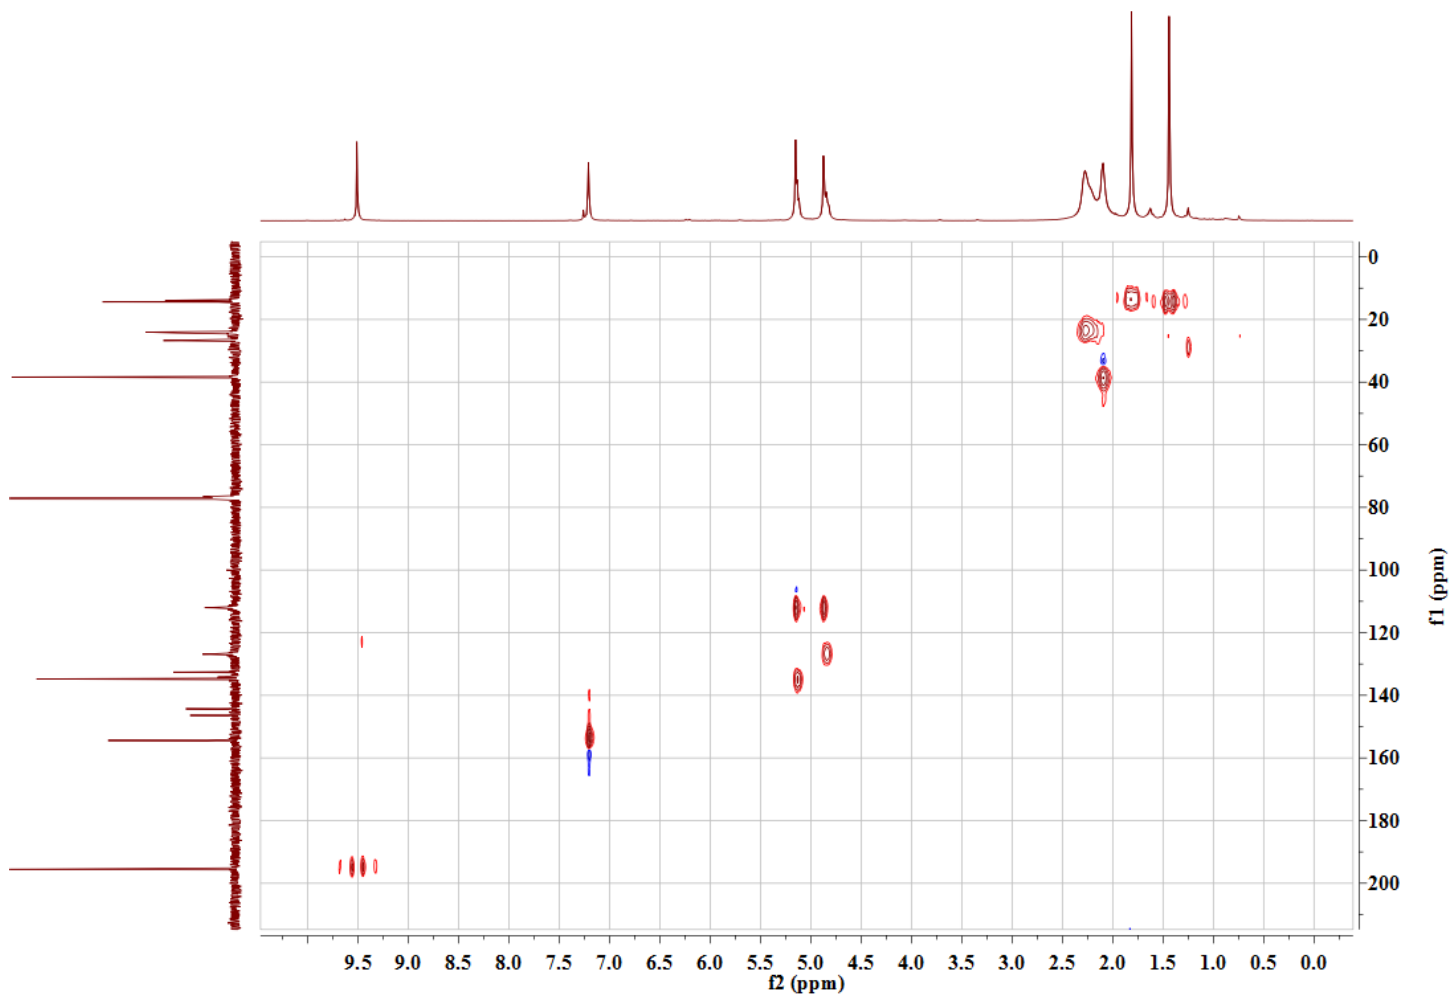

S5 HMBC Spectrum of **1** in CDCl<sub>3</sub>

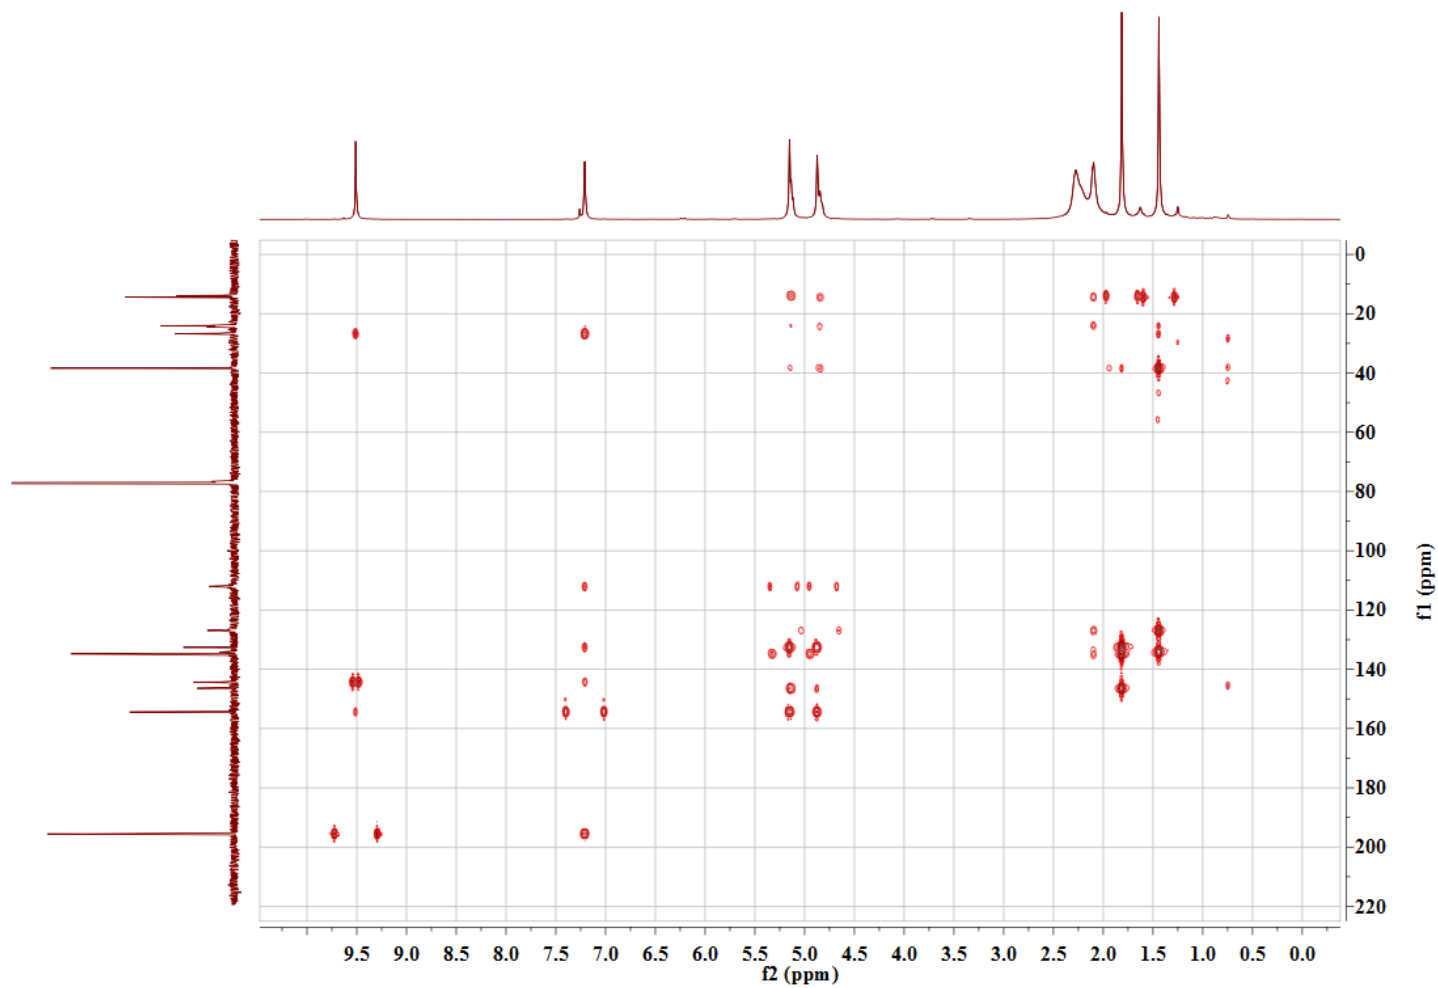

S6 NOESY Spectrum of **1** in CDCl<sub>3</sub>

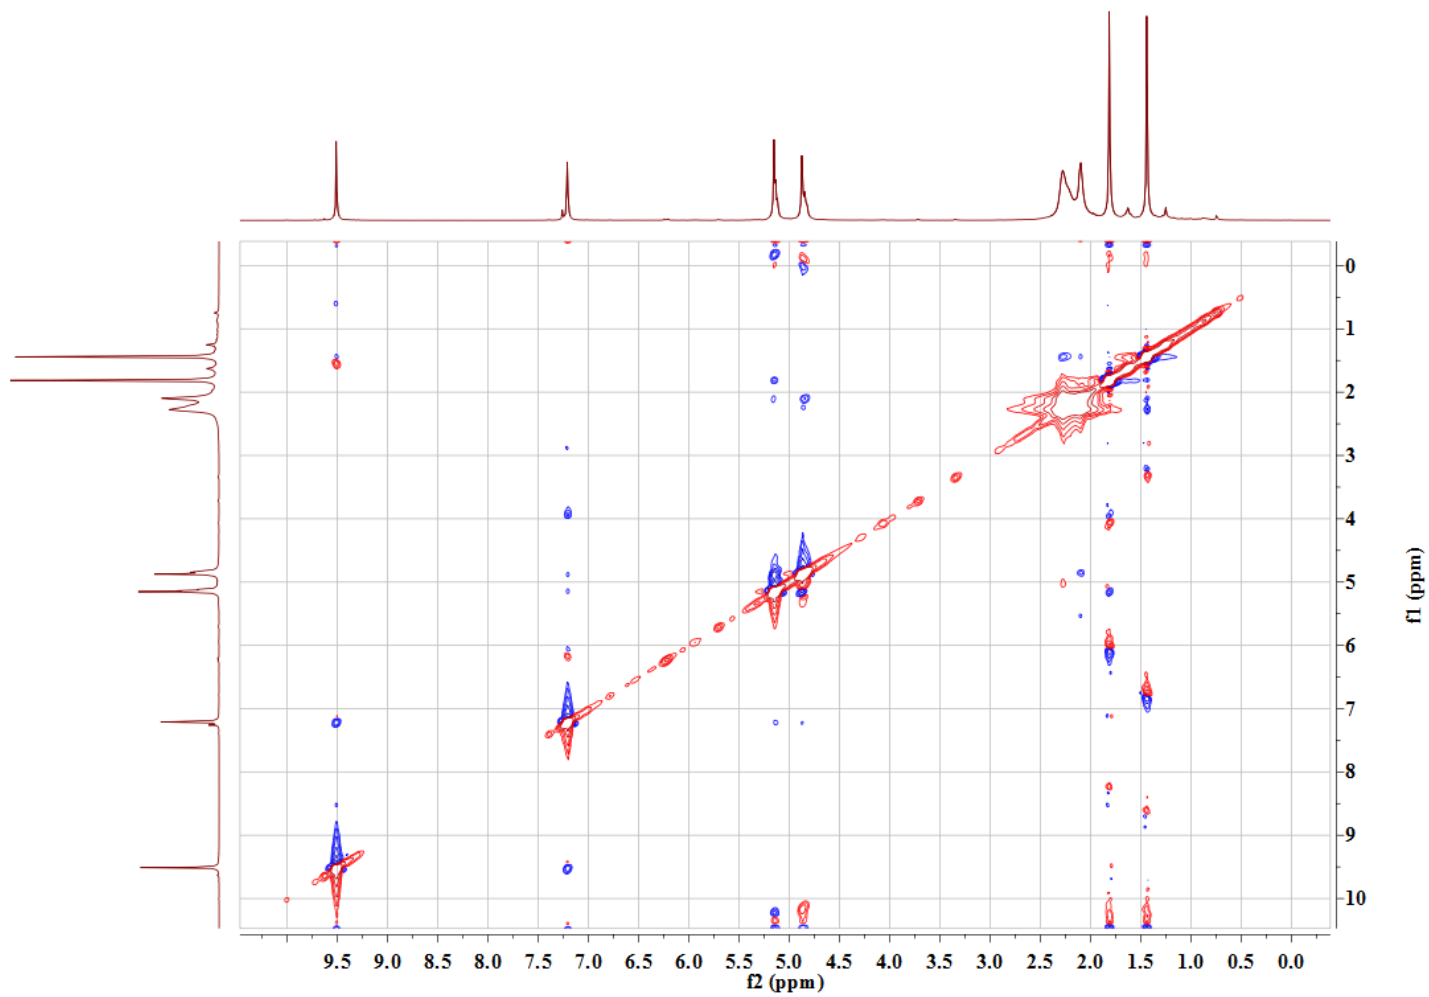

S7  $^1\text{H}$  NMR Spectrum of **2** in  $\text{CDCl}_3$

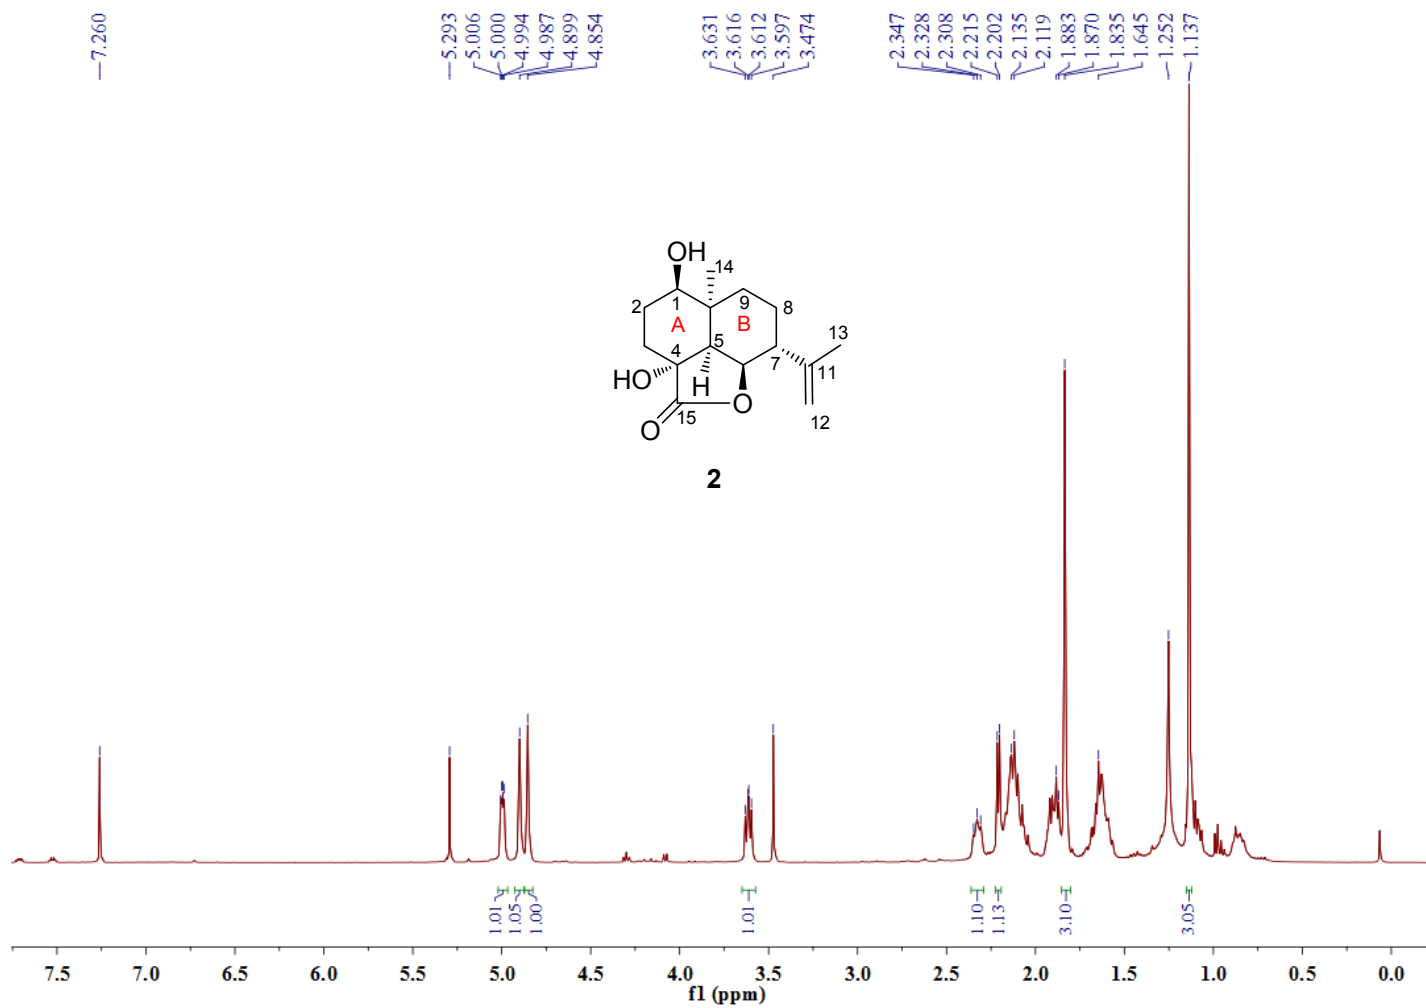

S8  $^{13}\text{C}$  NMR Spectra of **2** in  $\text{CDCl}_3$

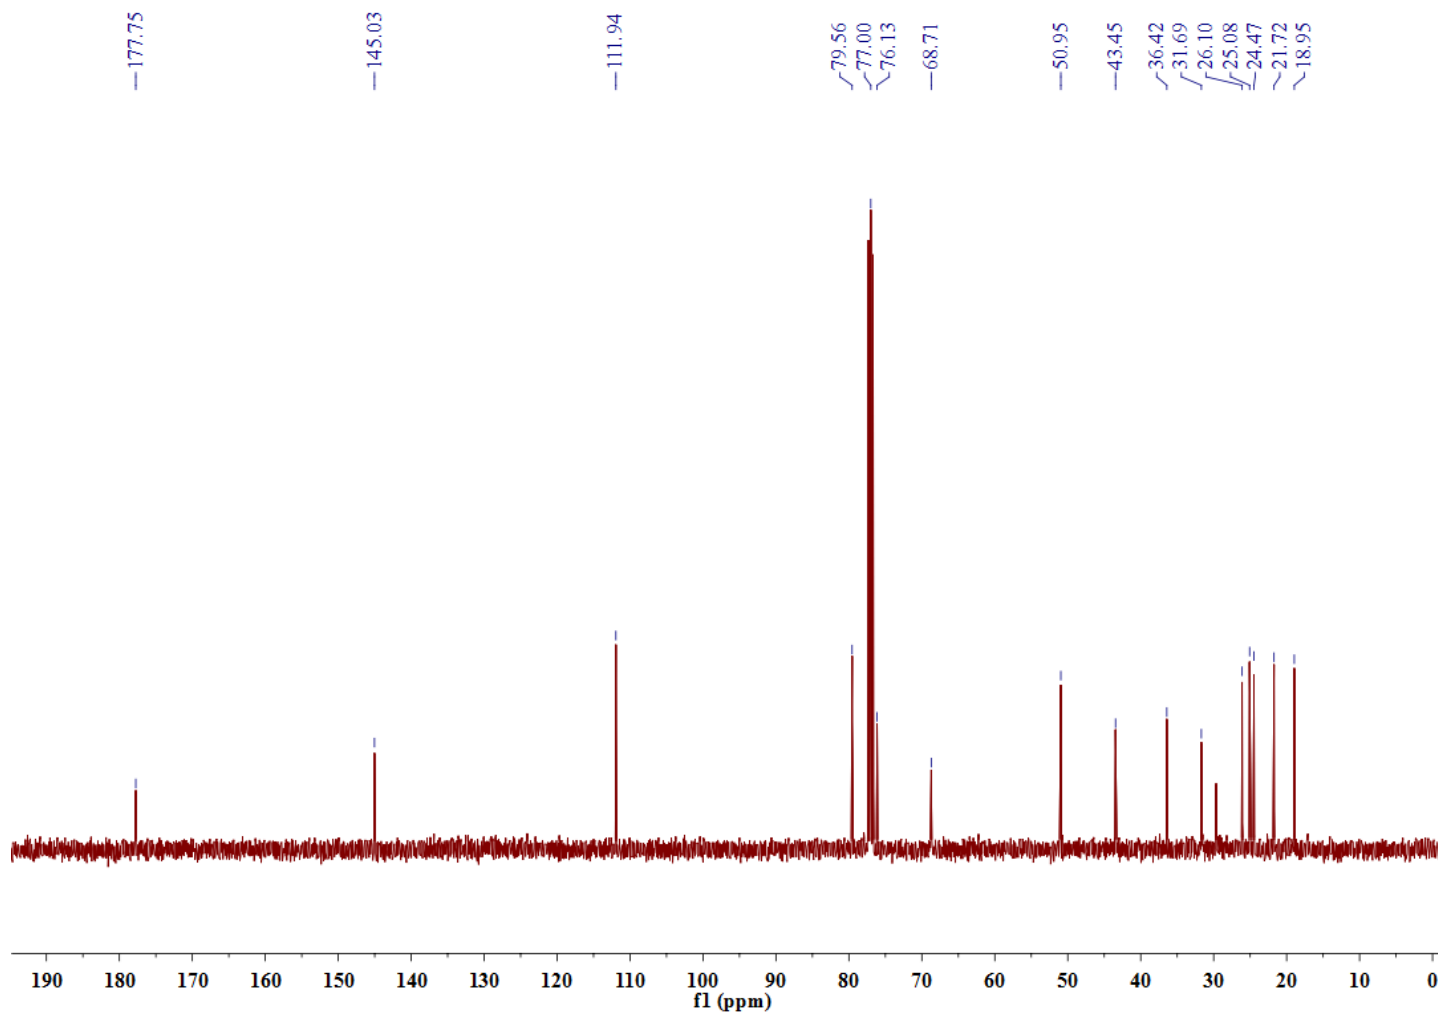

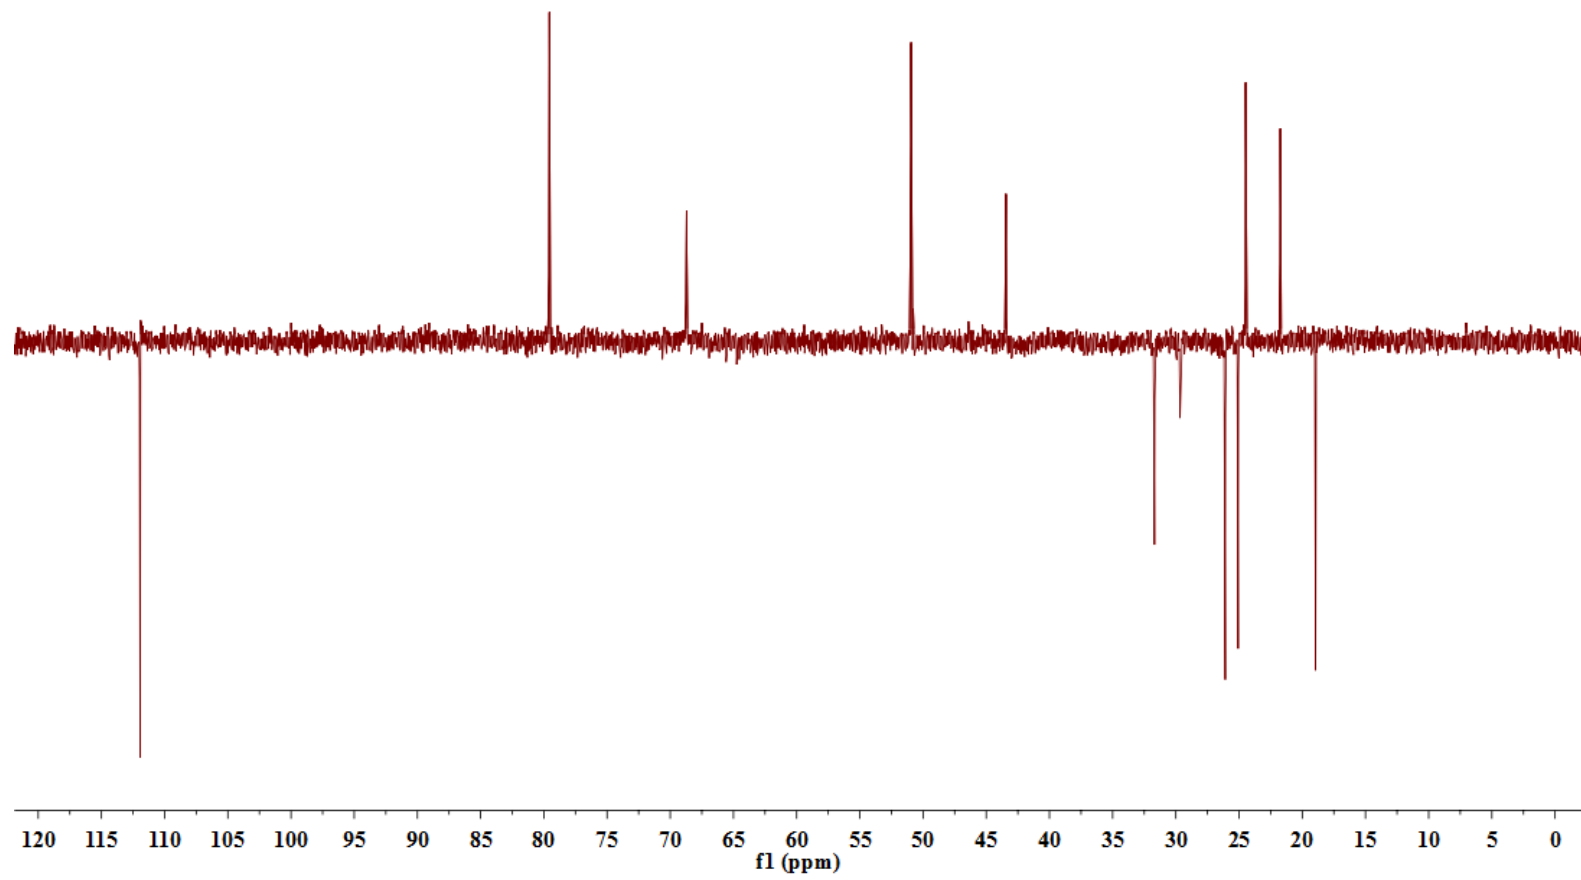

S9  $^1\text{H}$ - $^1\text{H}$  COSY Spectrum of **2** in  $\text{CDCl}_3$

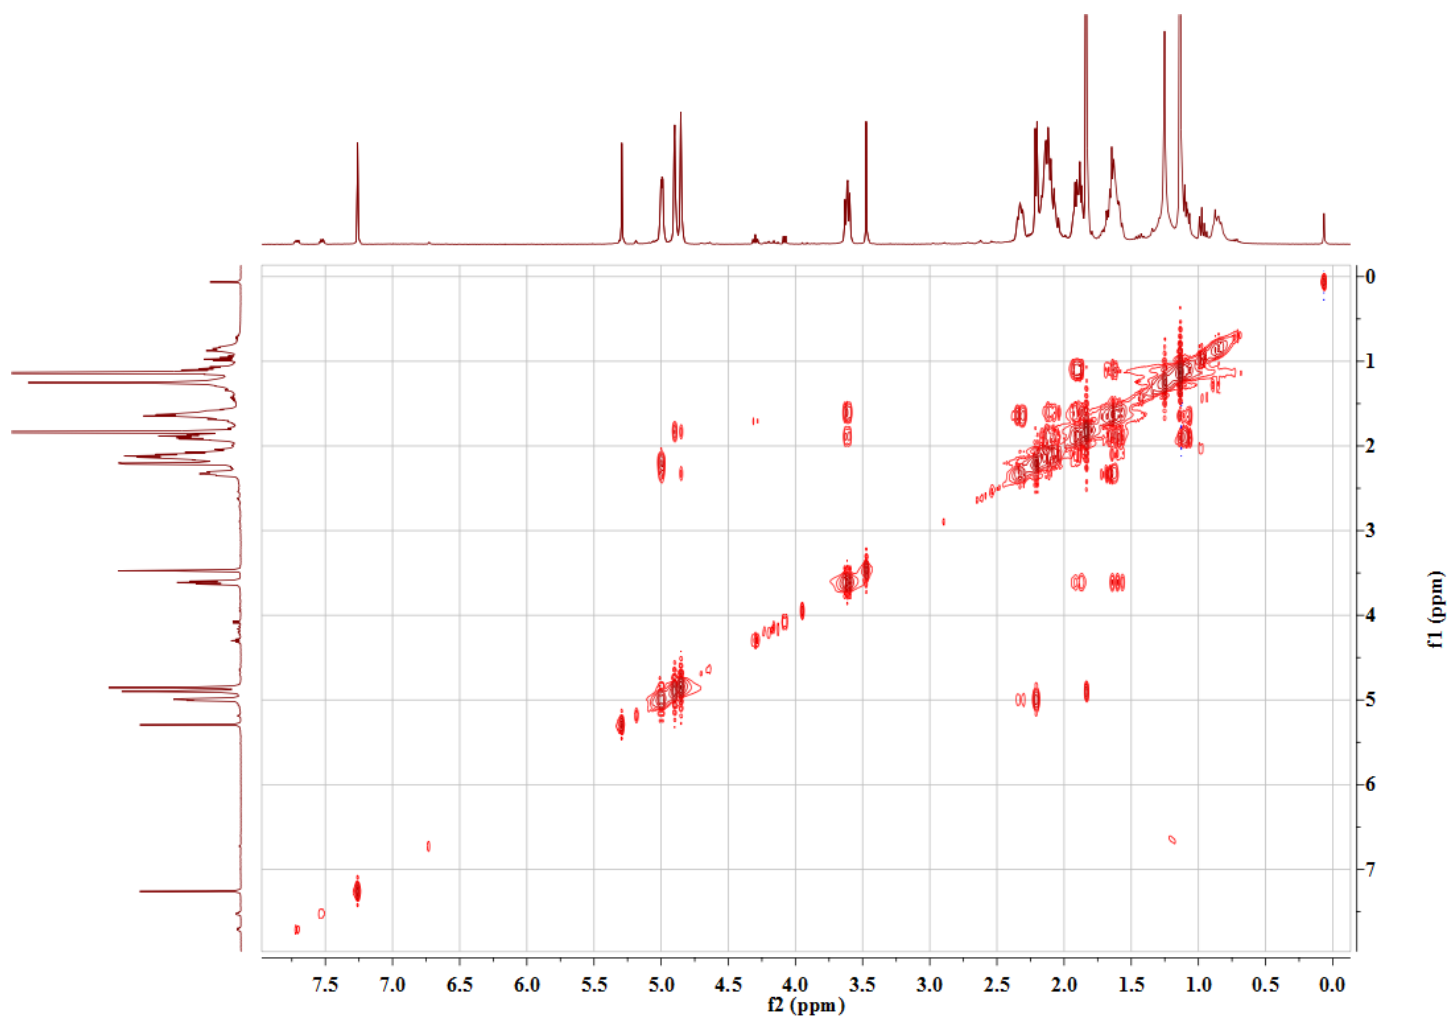

S10 HSQC Spectrum of **2** in CDCl<sub>3</sub>

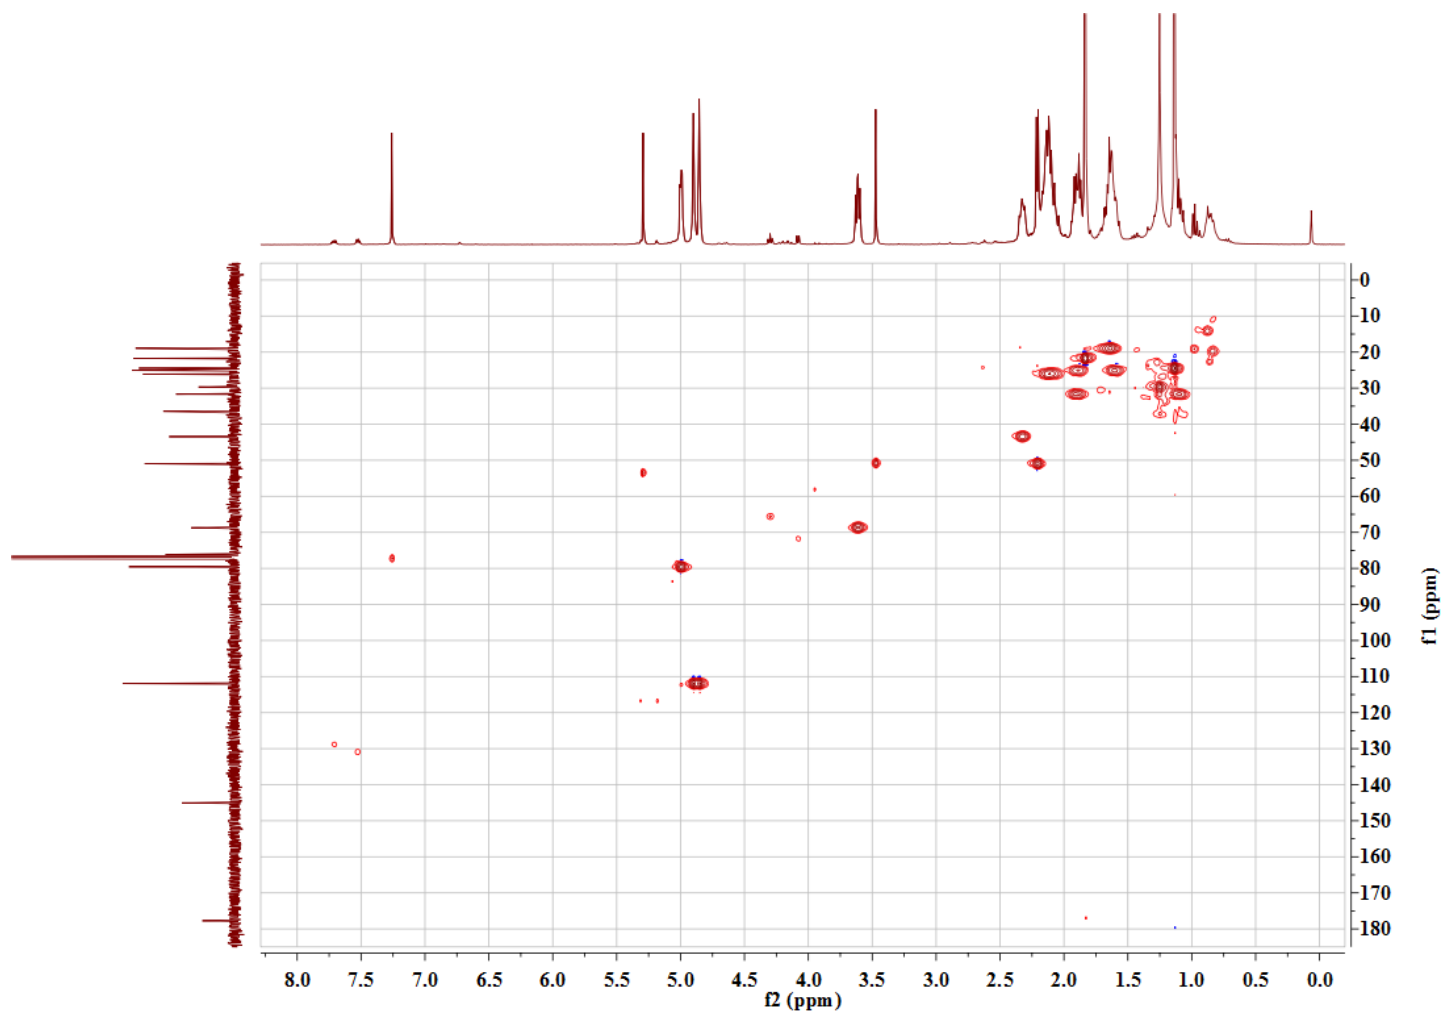



S11 HMBC Spectrum of **2** in CDCl<sub>3</sub>

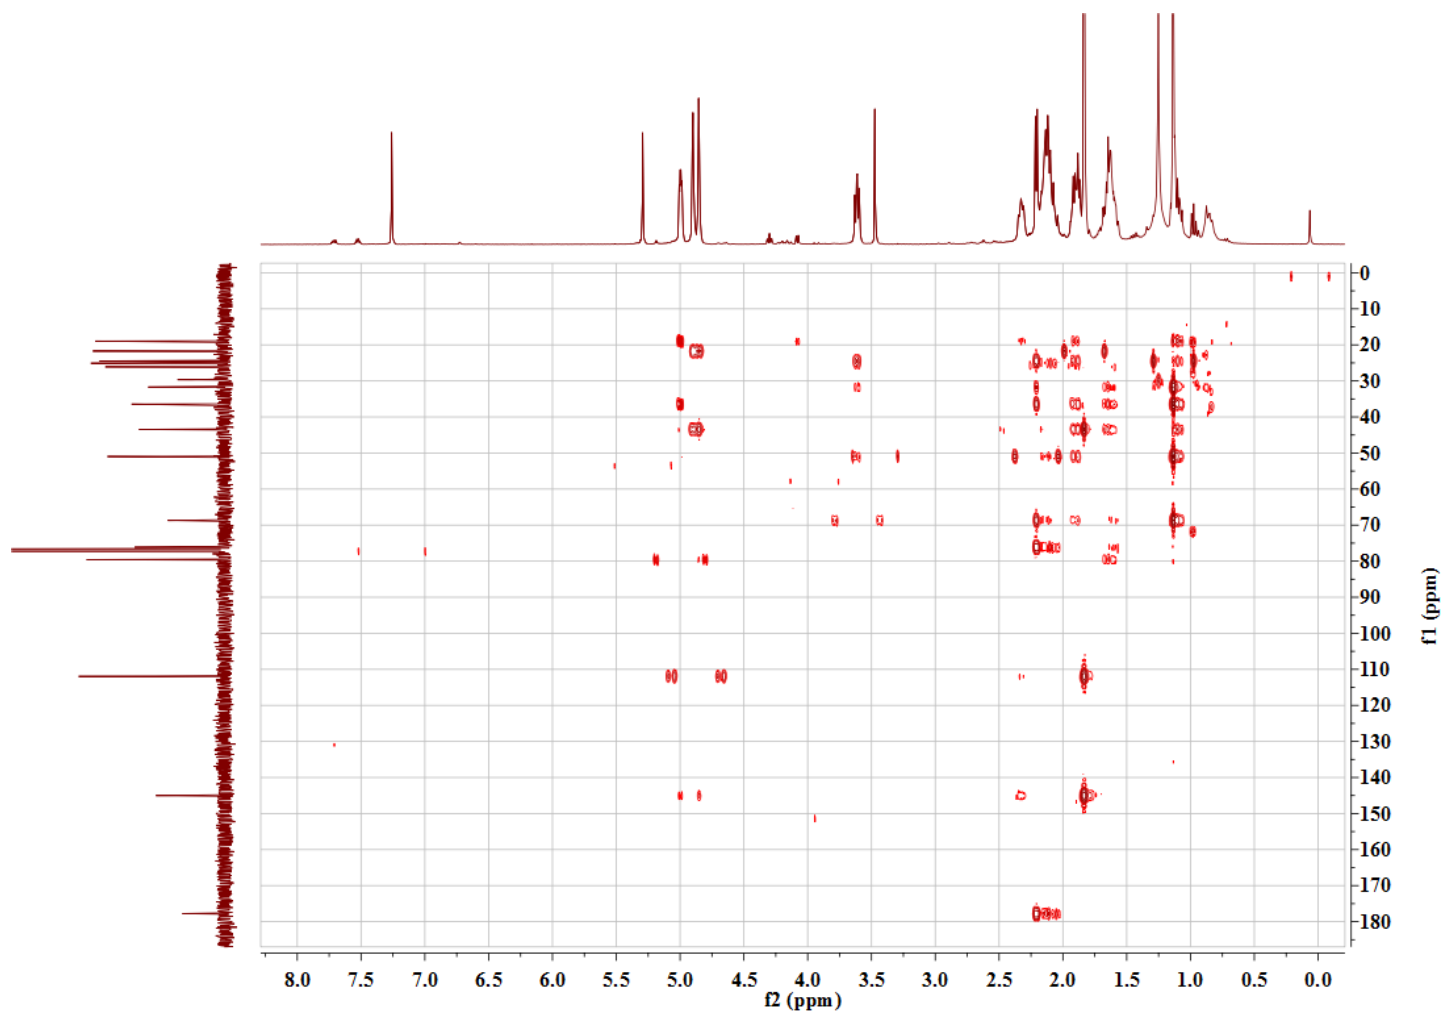

S12  $^1\text{H}$  NMR Spectrum of **2** in  $\text{C}_5\text{D}_5\text{N}$

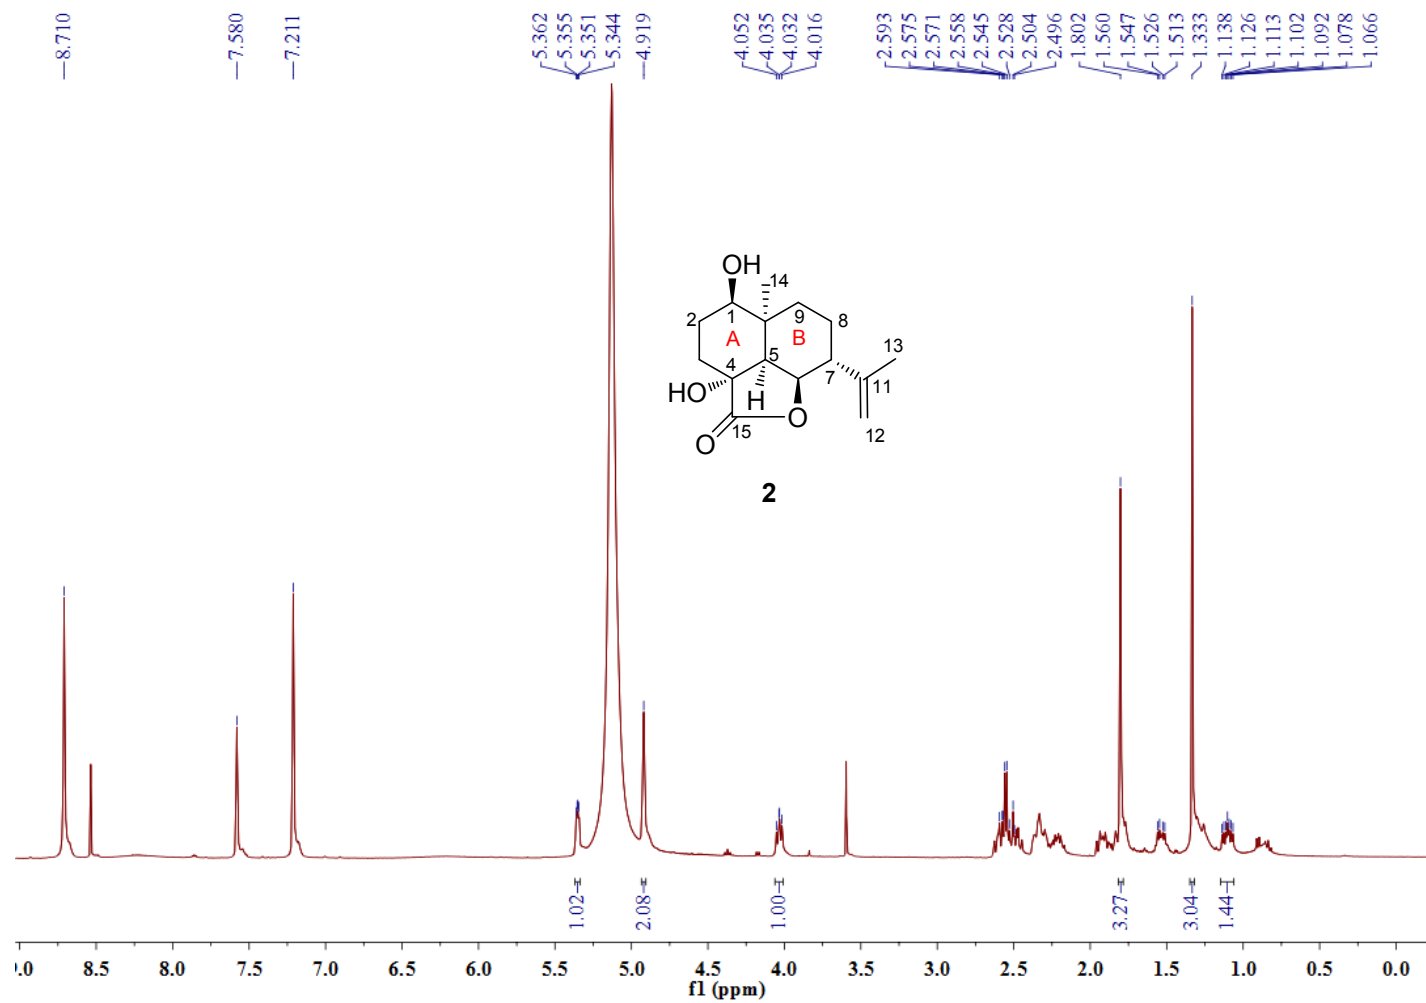

**S13**  $^{13}\text{C}$  NMR Spectra of **2** in  $\text{C}_5\text{D}_5\text{N}$

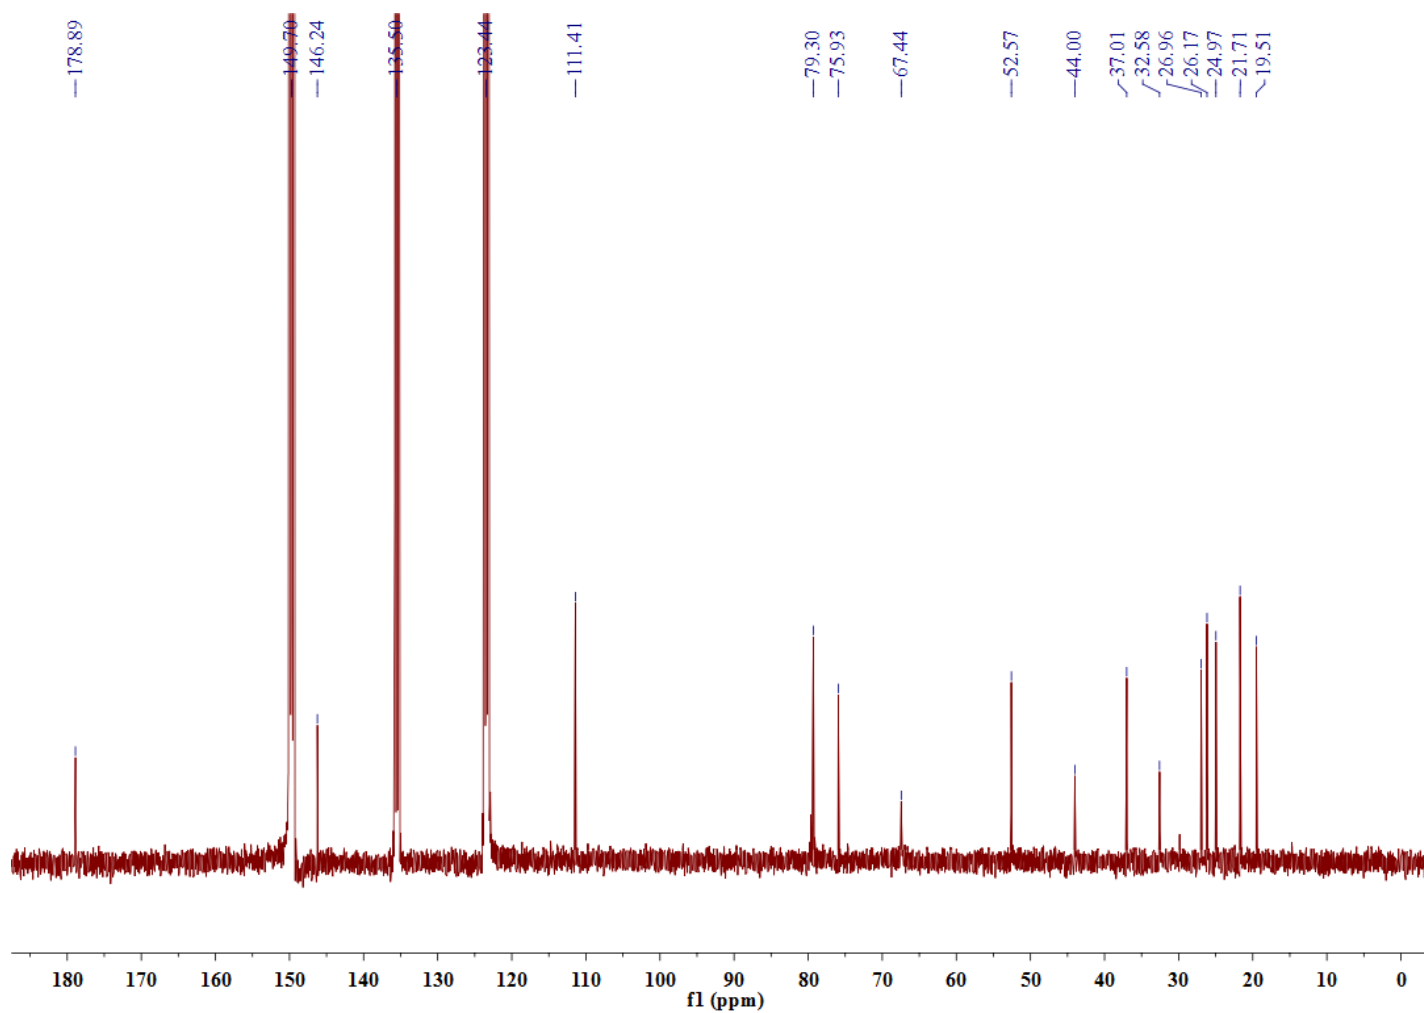

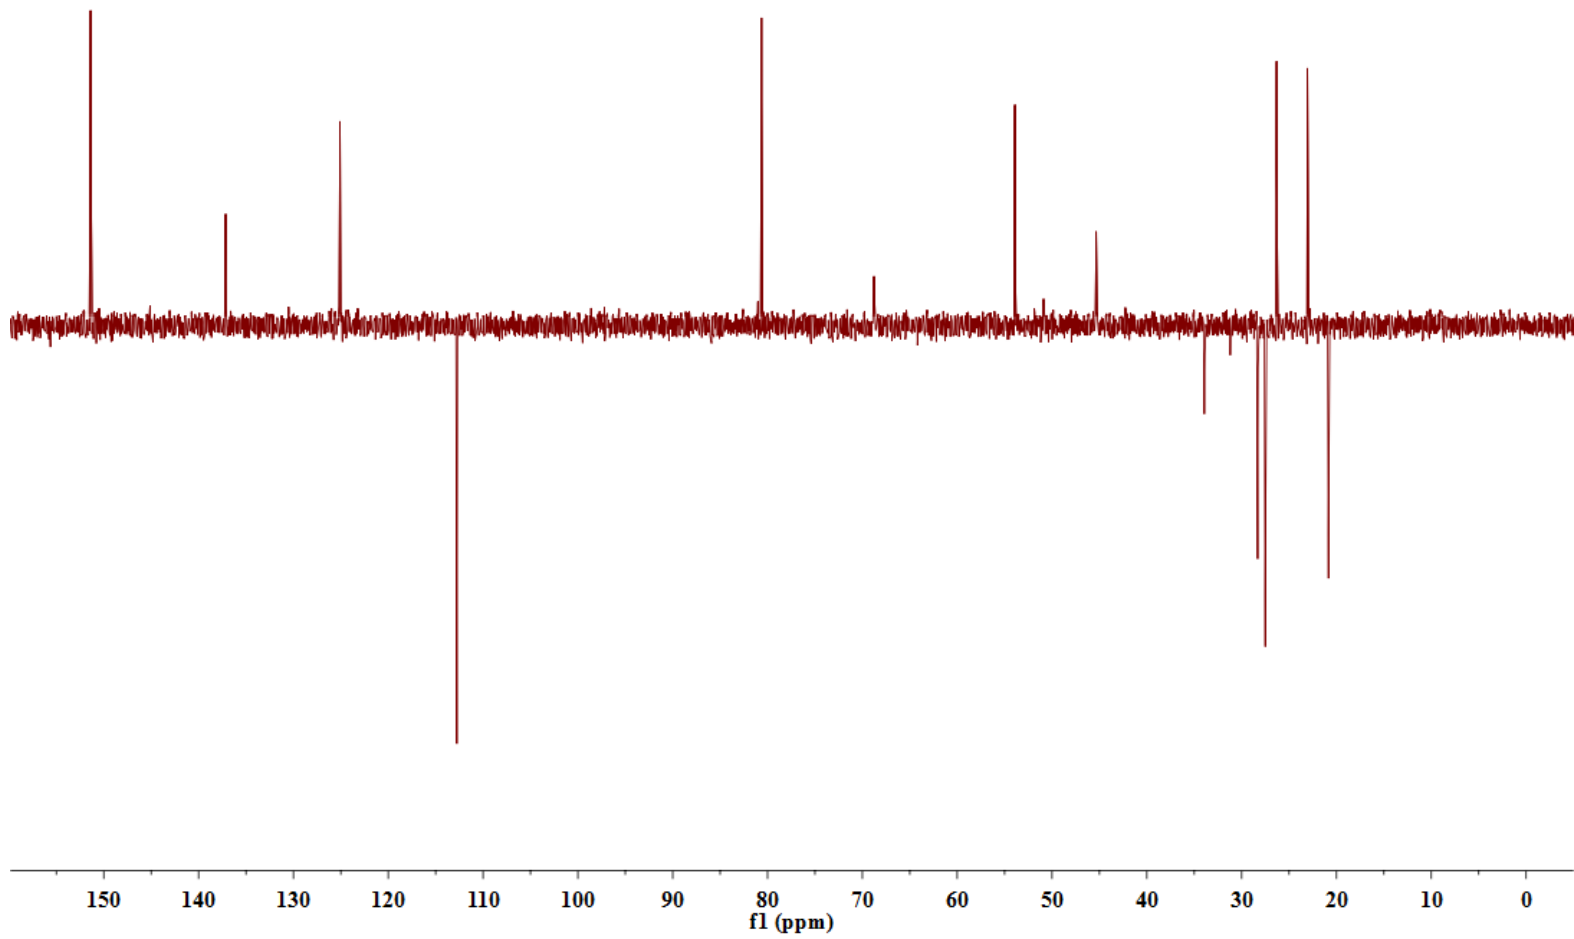

S14  $^1\text{H}$ - $^1\text{H}$  COSY Spectrum of **2** in  $\text{C}_5\text{D}_5\text{N}$

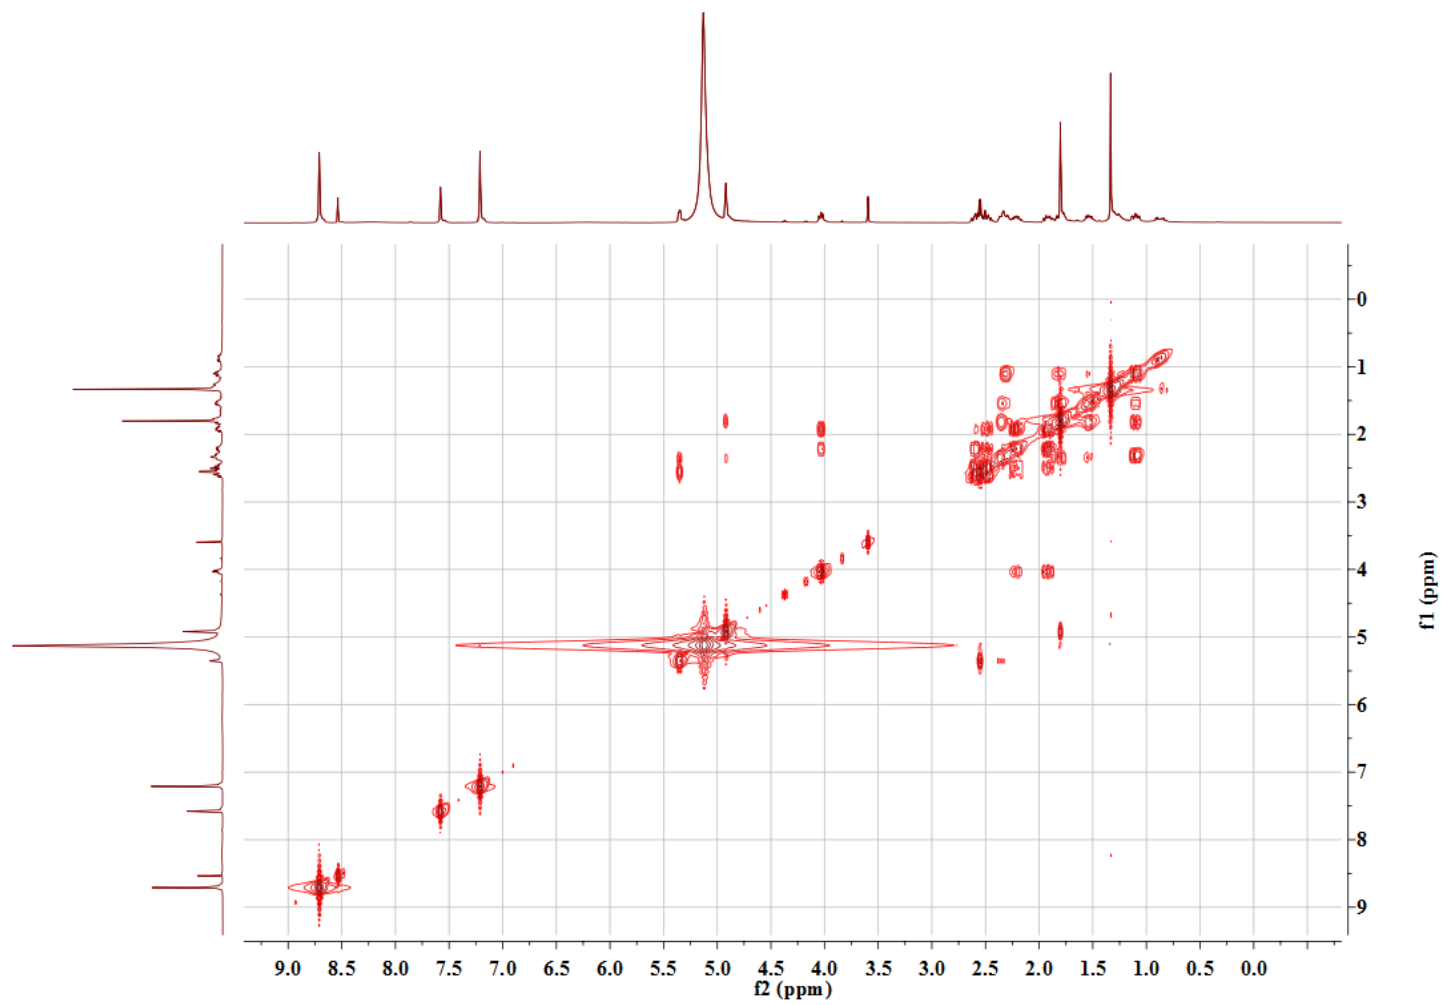

S15 HSQC Spectrum of **2** in C<sub>5</sub>D<sub>5</sub>N

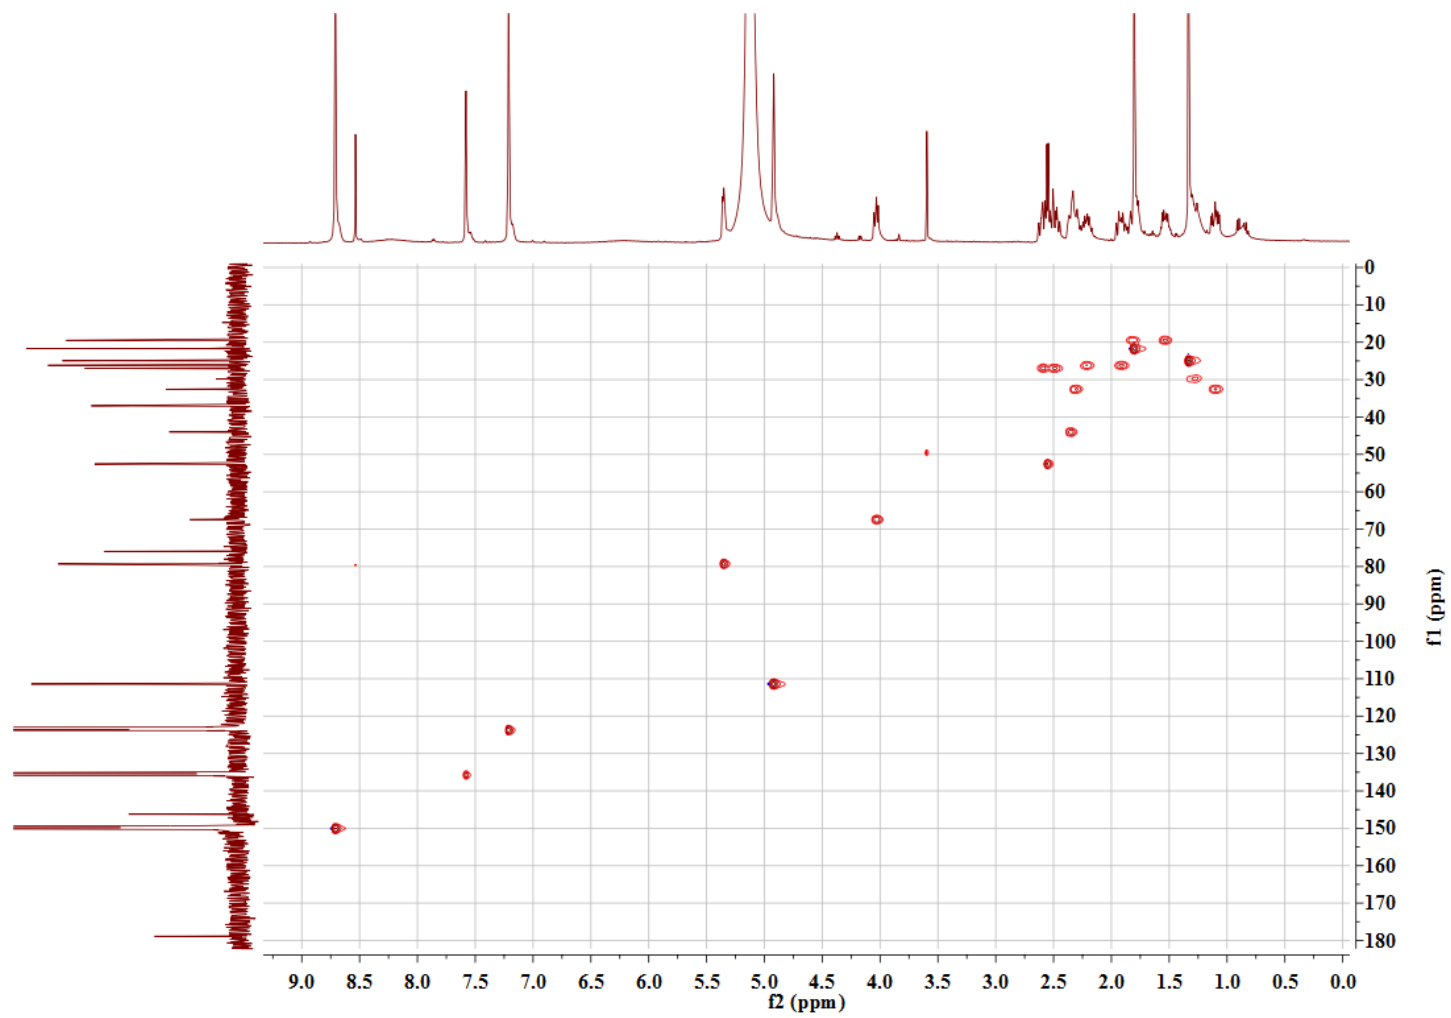

S16 HMBC Spectrum of **2** in C<sub>5</sub>D<sub>5</sub>N

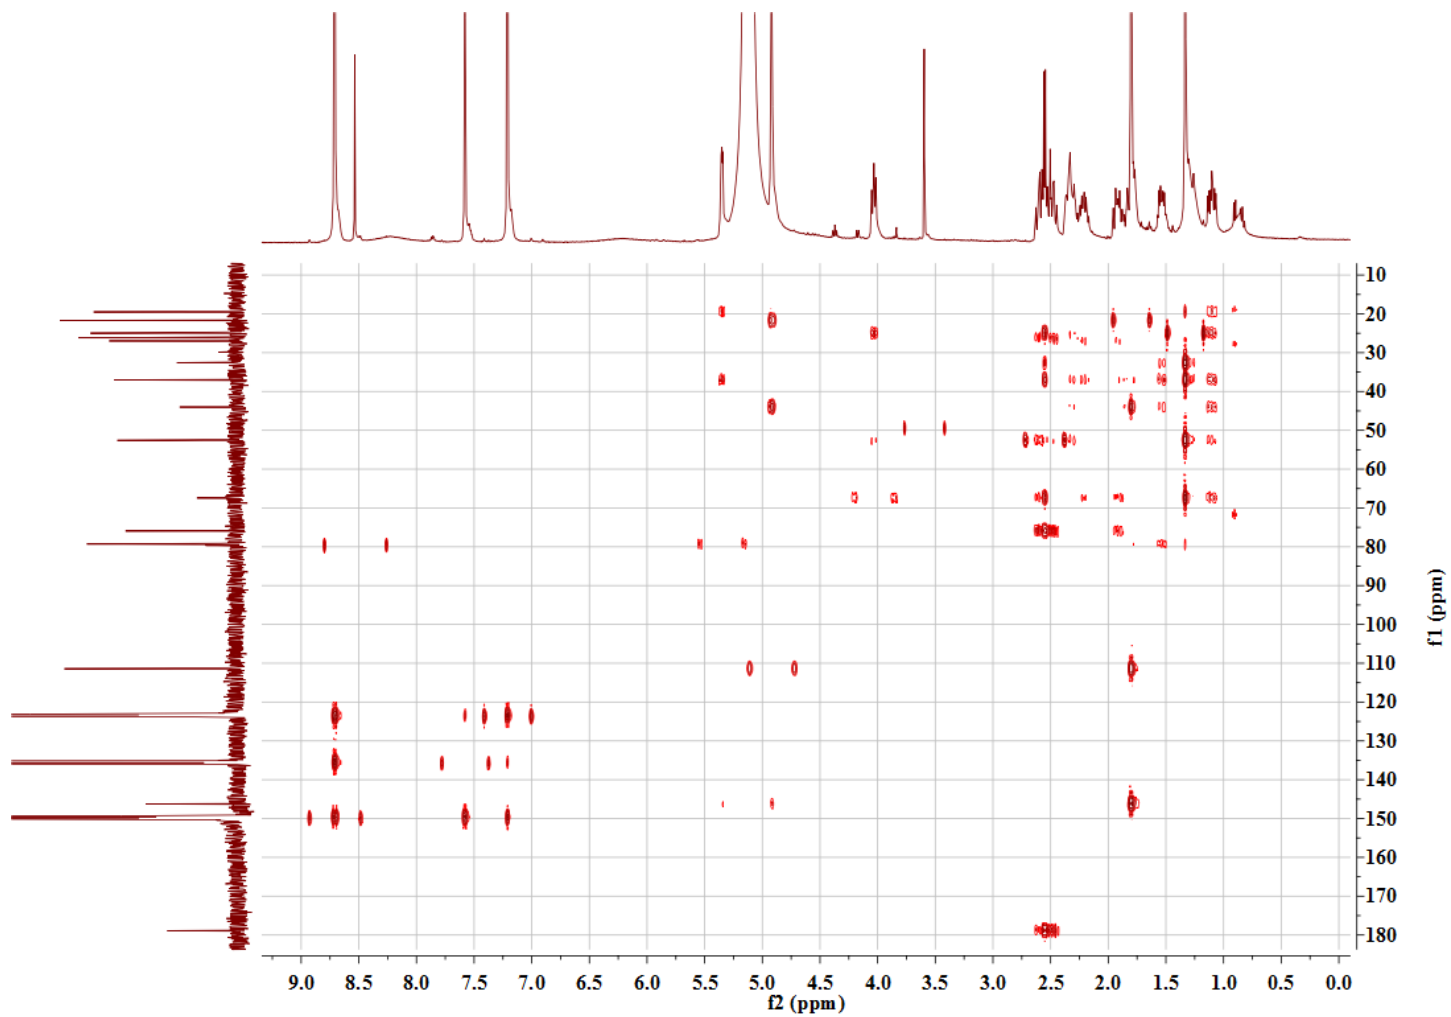

S17 NOESY Spectrum of **2** in C<sub>5</sub>D<sub>5</sub>N

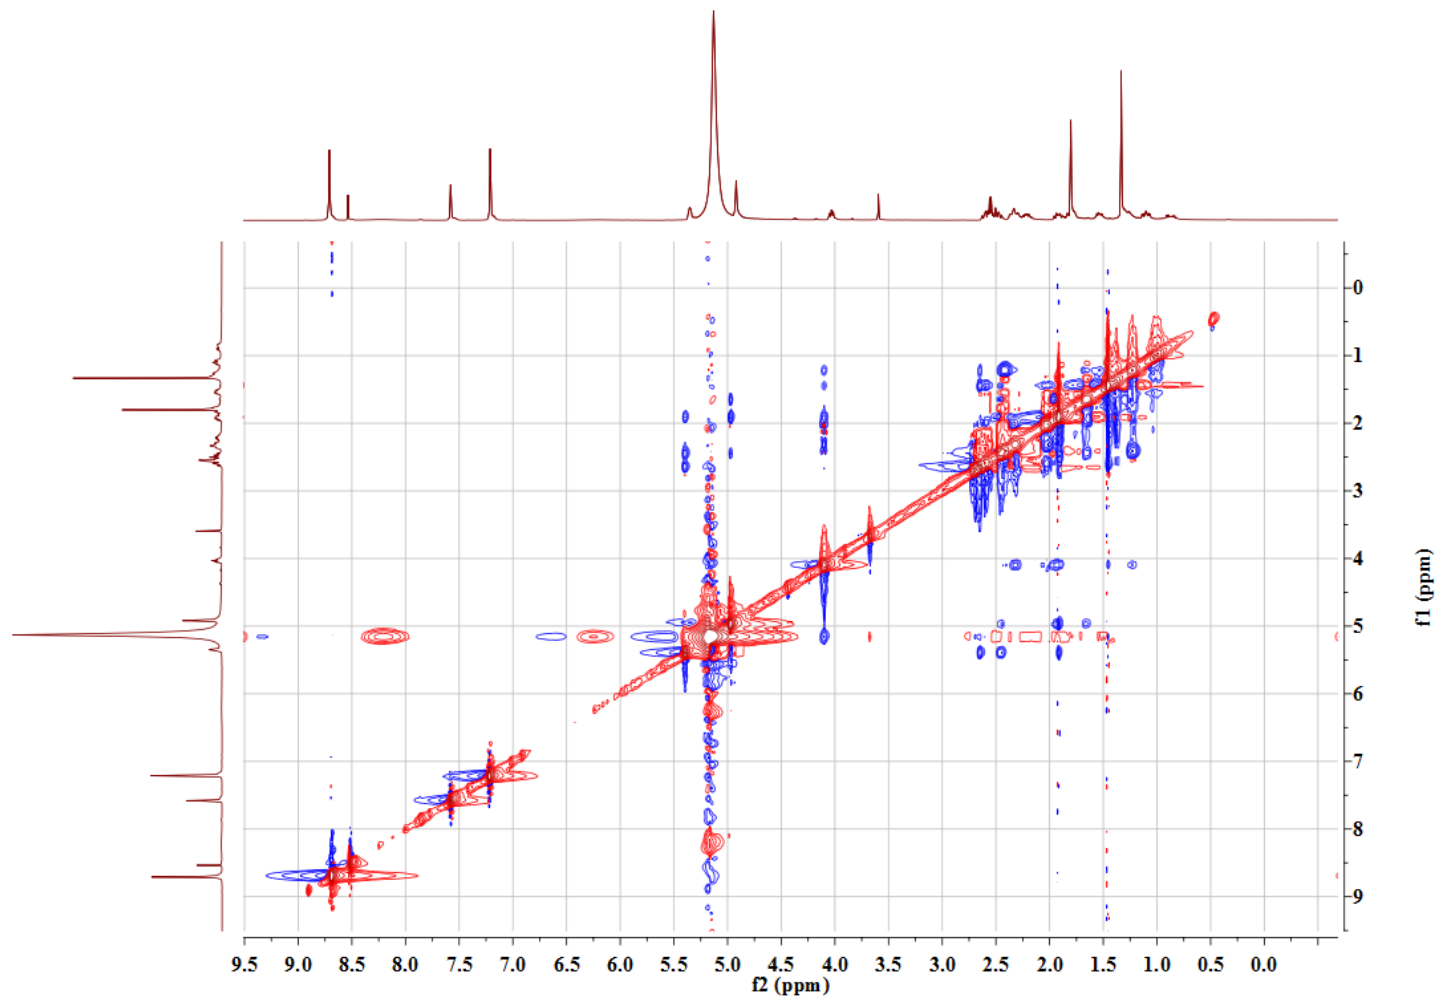



S18 <sup>1</sup>H NMR Spectrum of **3** in CDCl<sub>3</sub>

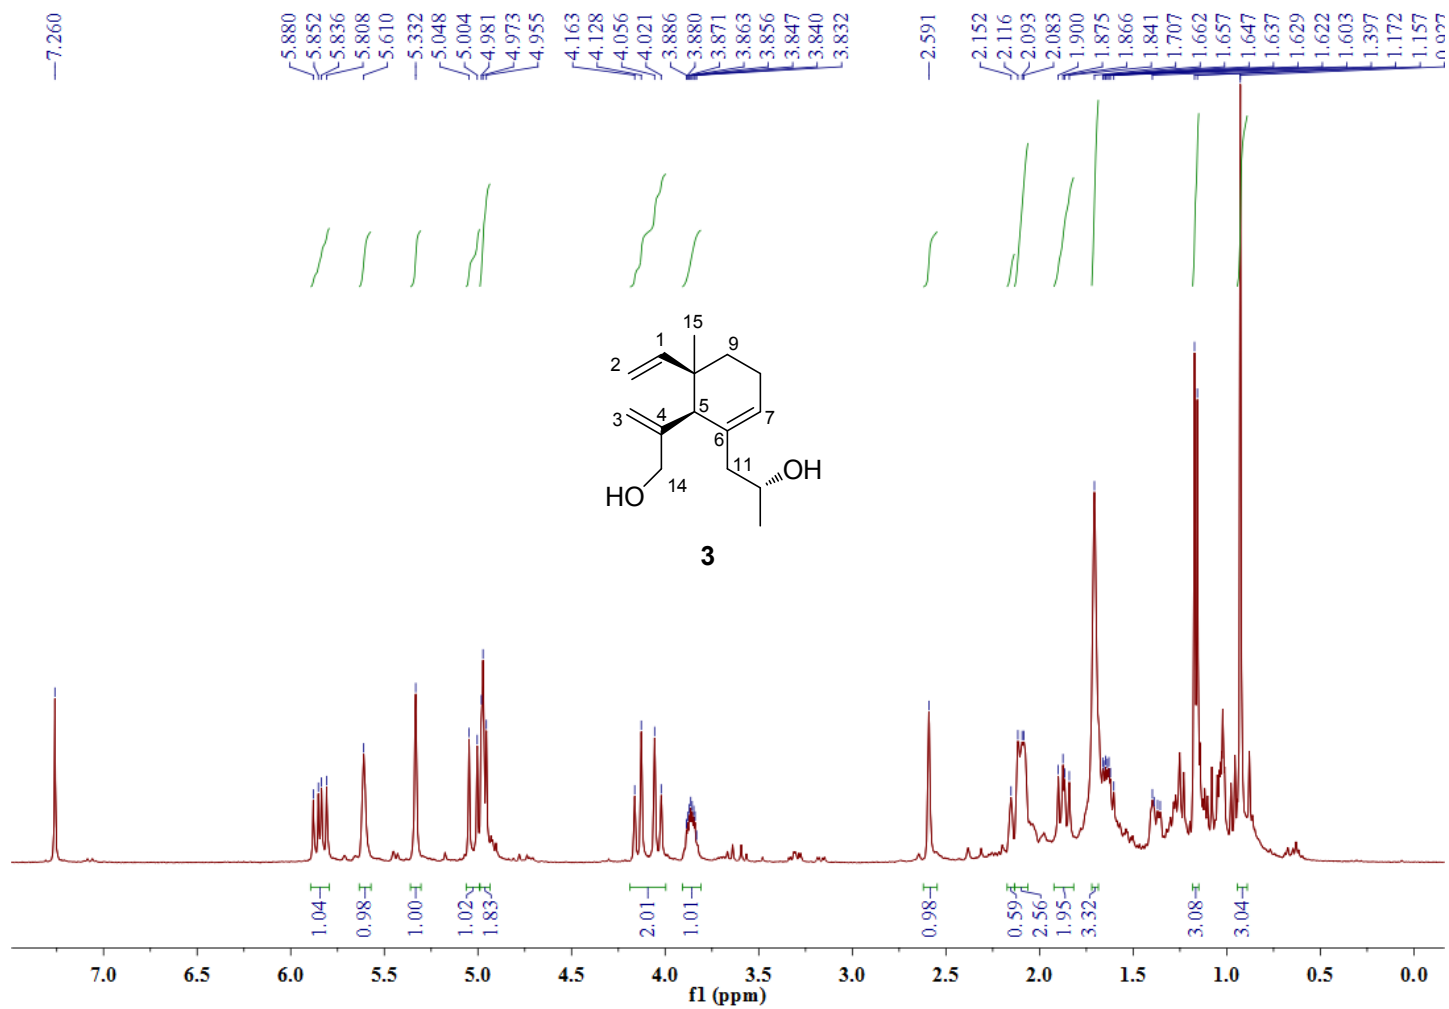

**S19**  $^{13}\text{C}$  NMR Spectra of **3** in  $\text{CDCl}_3$

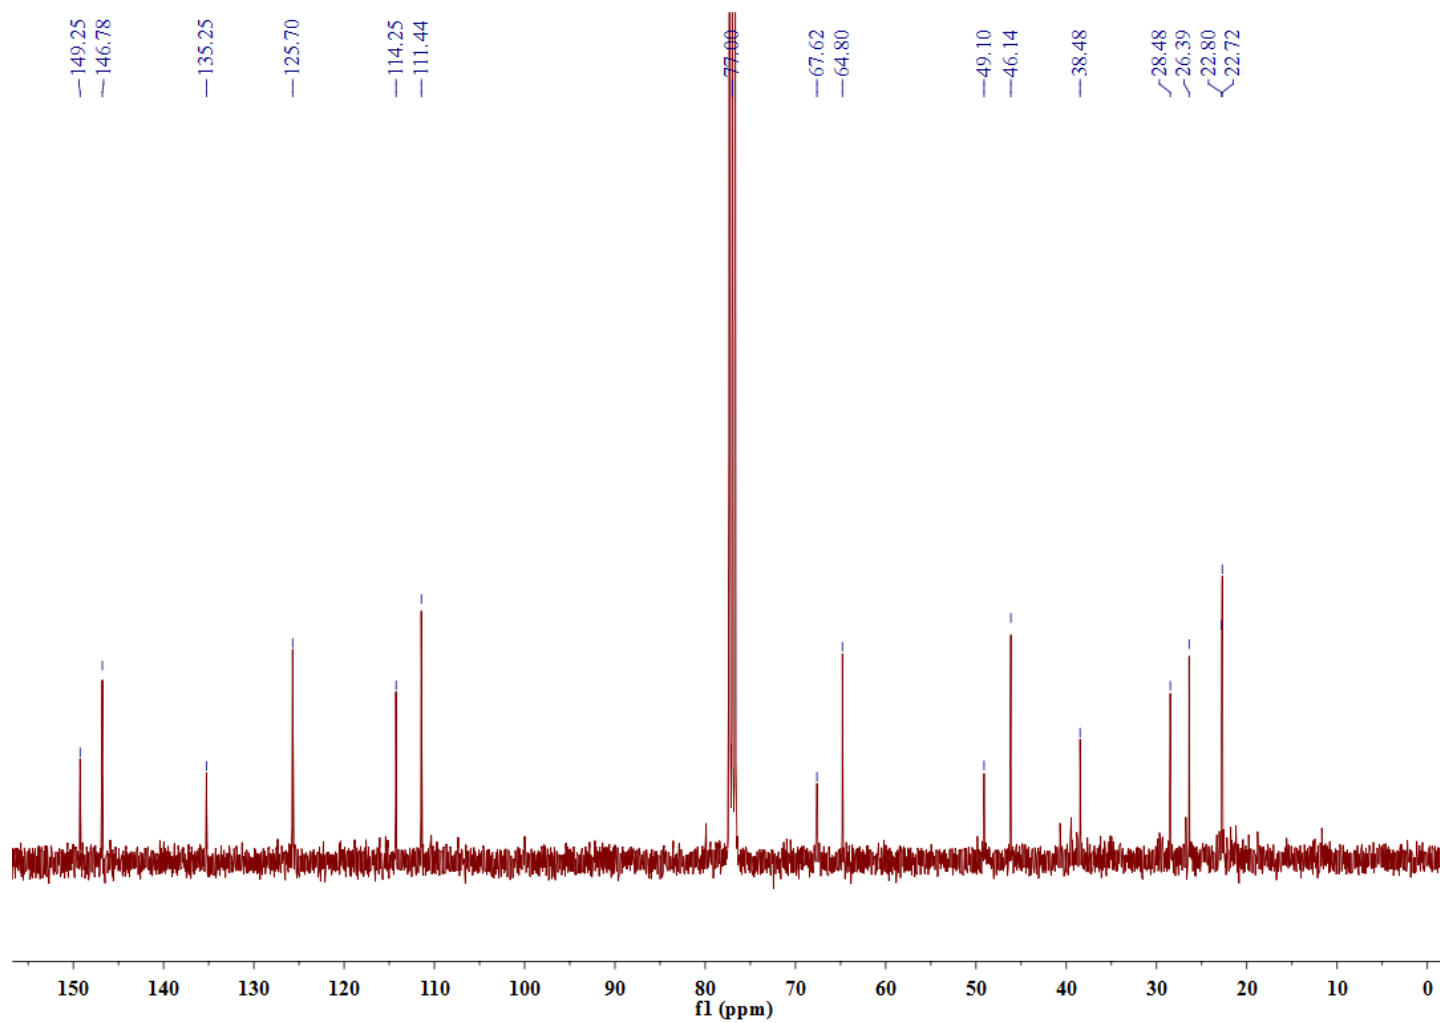

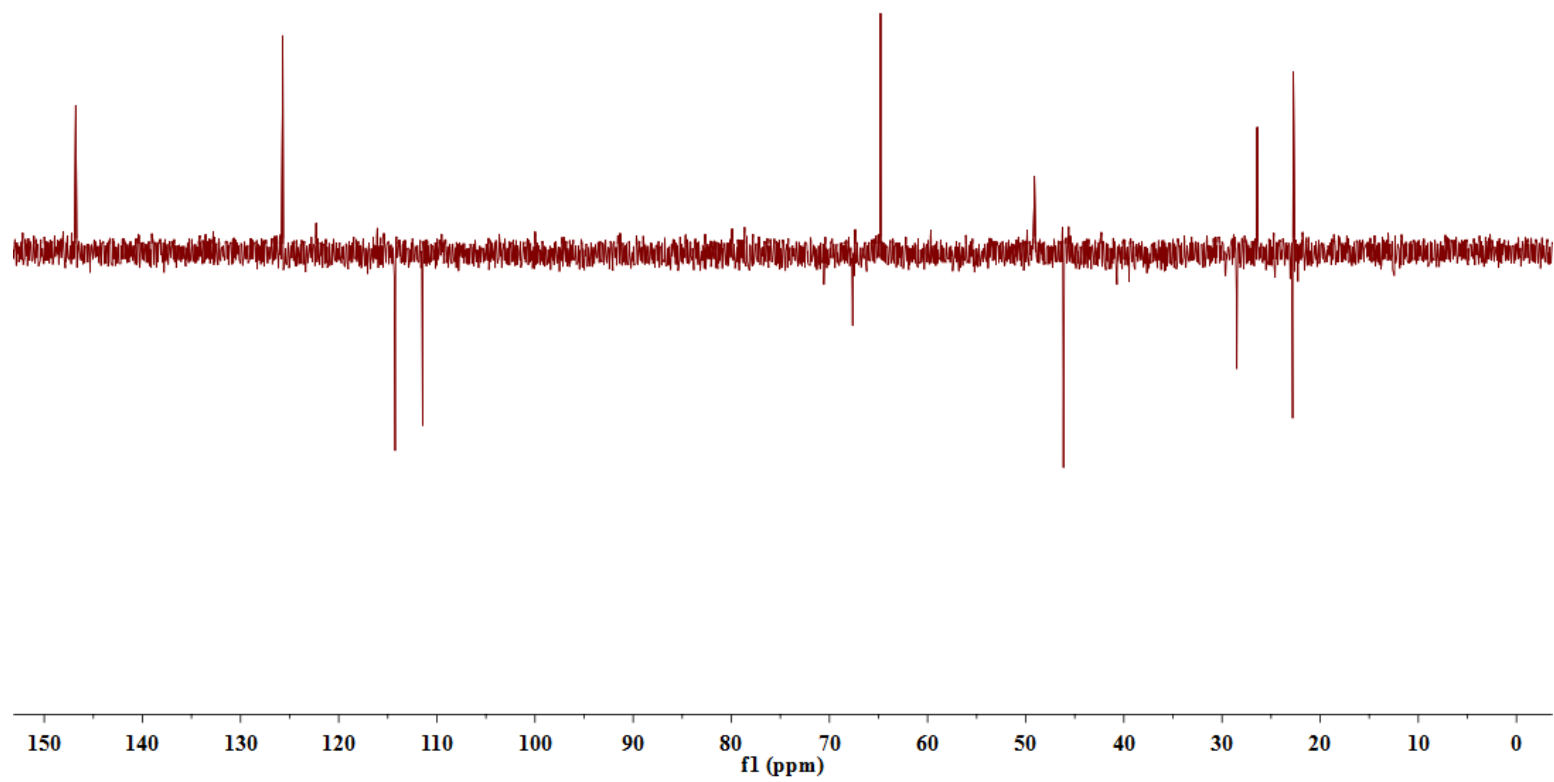

S20  $^1\text{H}$ - $^1\text{H}$  COSY Spectrum of **3** in  $\text{CDCl}_3$

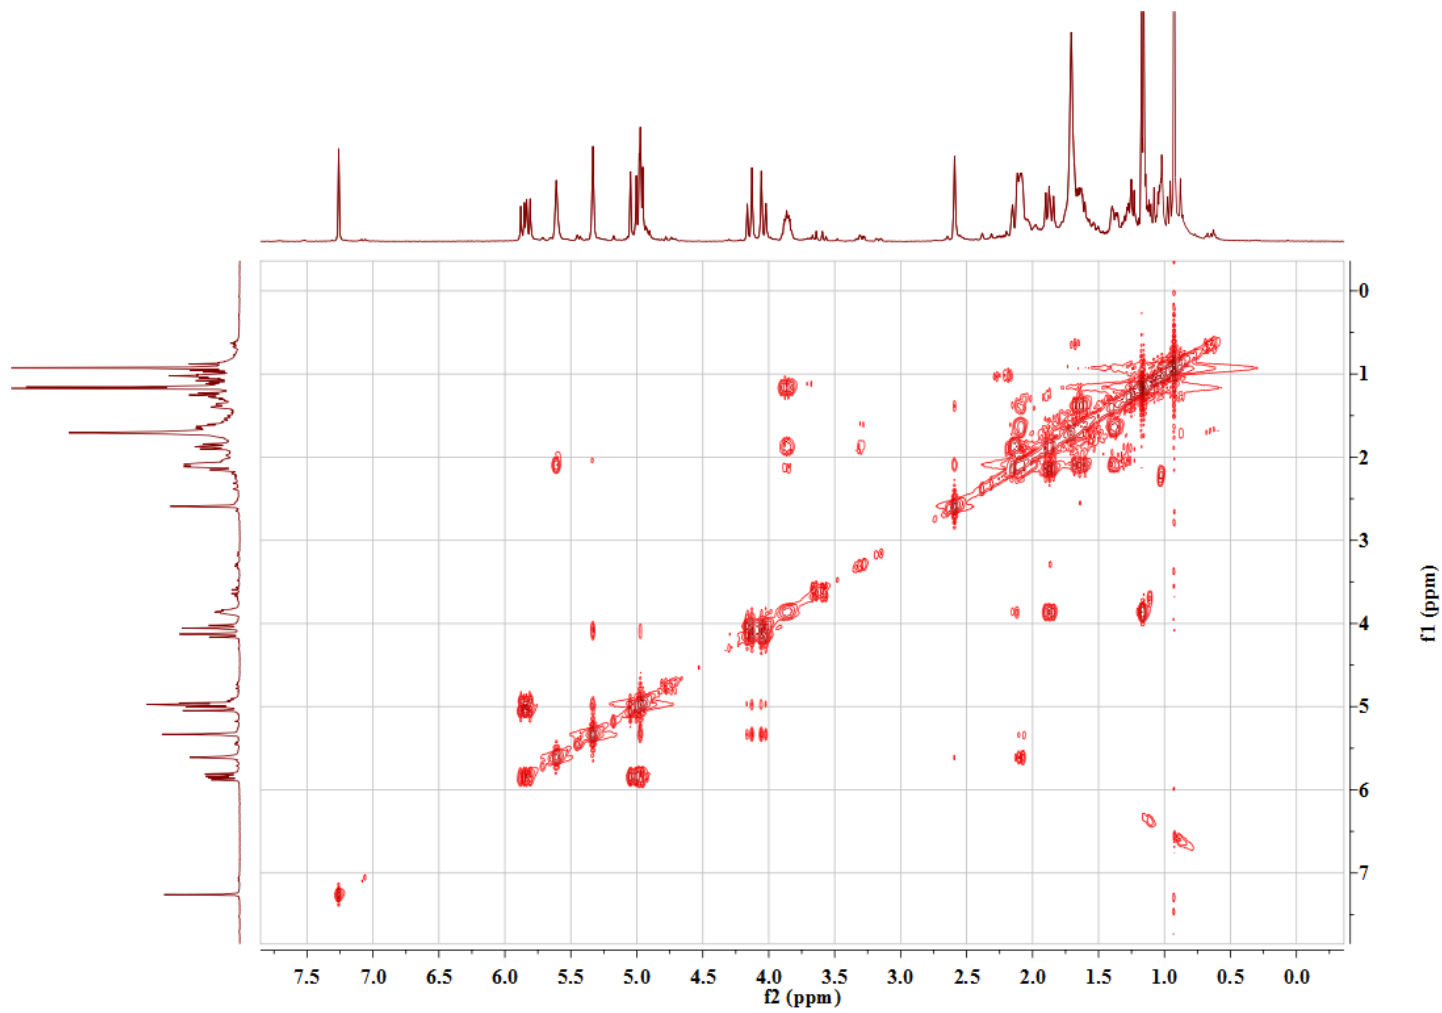

S21 HSQC Spectrum of **3** in CDCl<sub>3</sub>

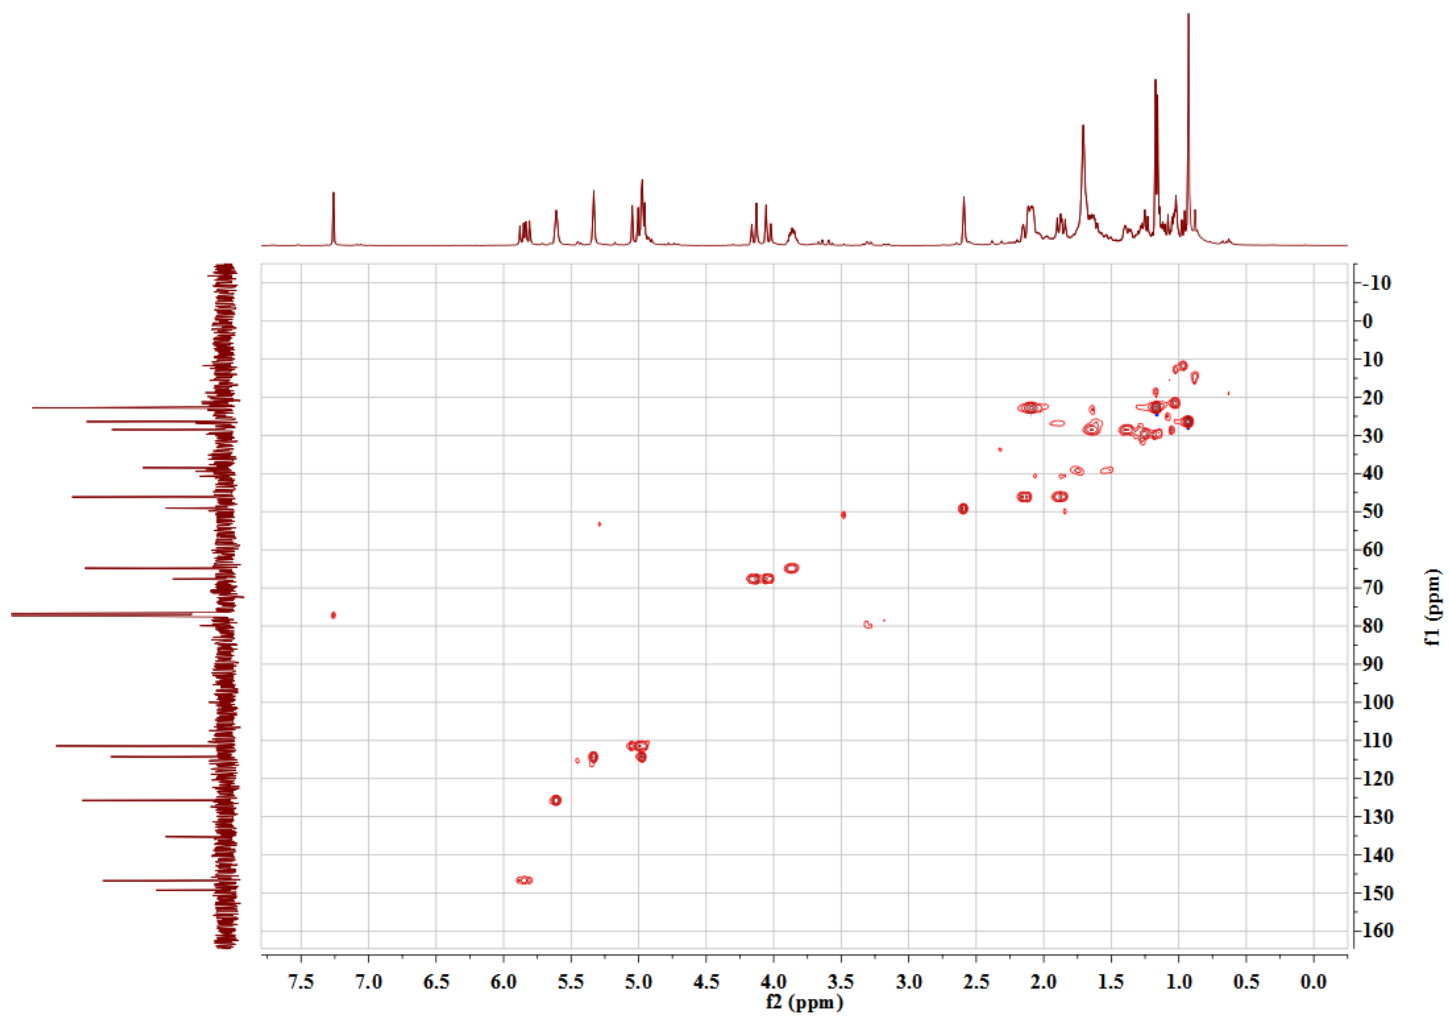

S22 HMBC Spectrum of **3** in CDCl<sub>3</sub>

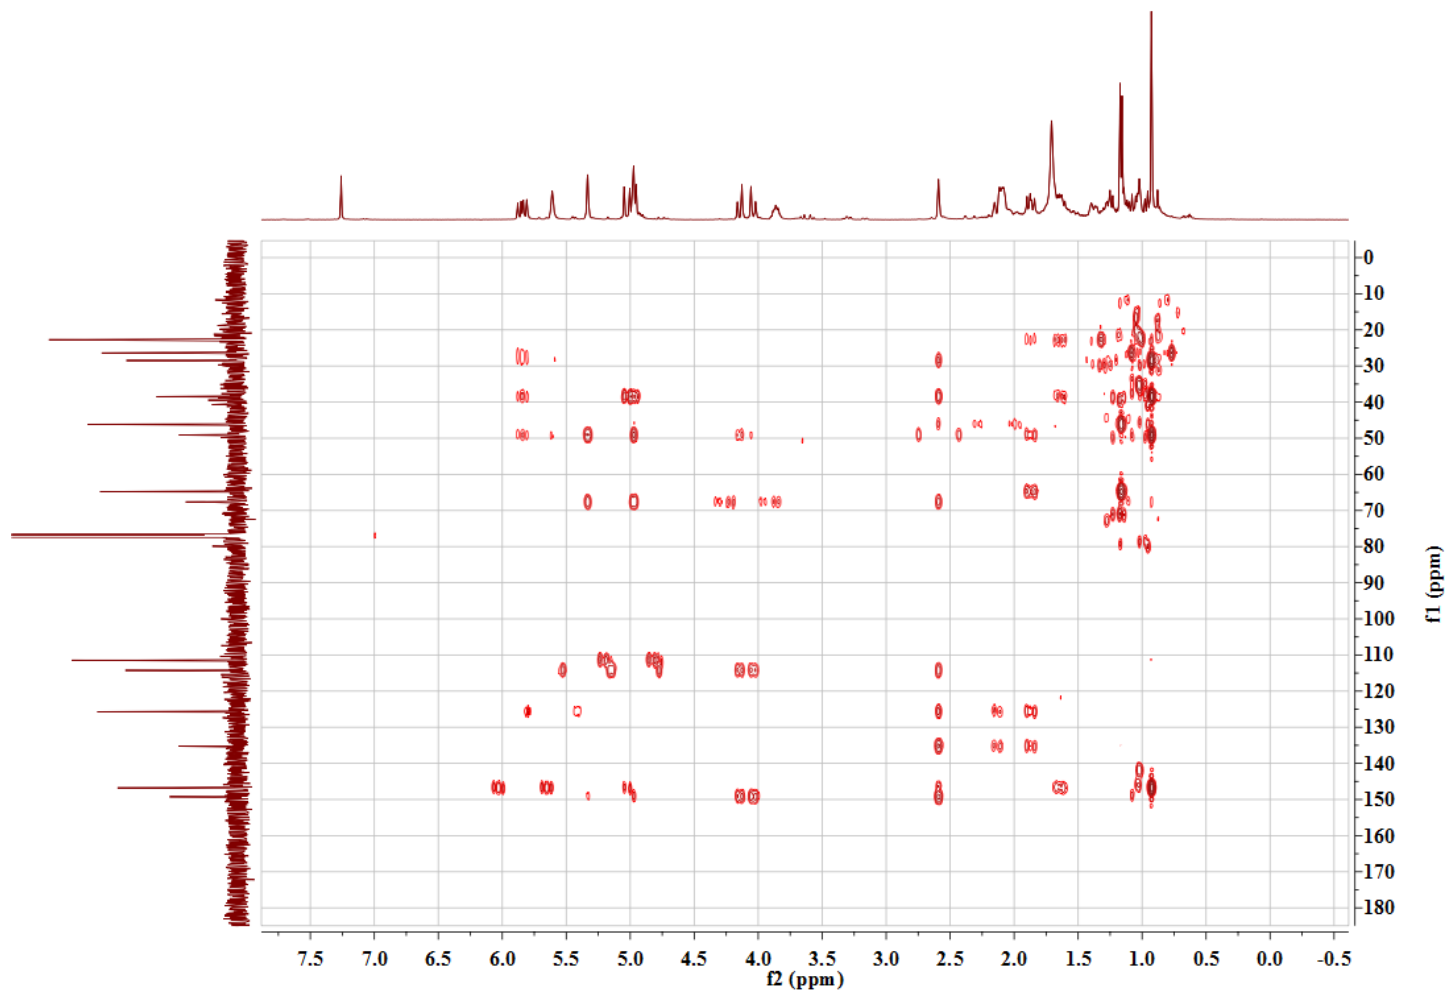

S23 NOESY Spectrum of **3** in CDCl<sub>3</sub>

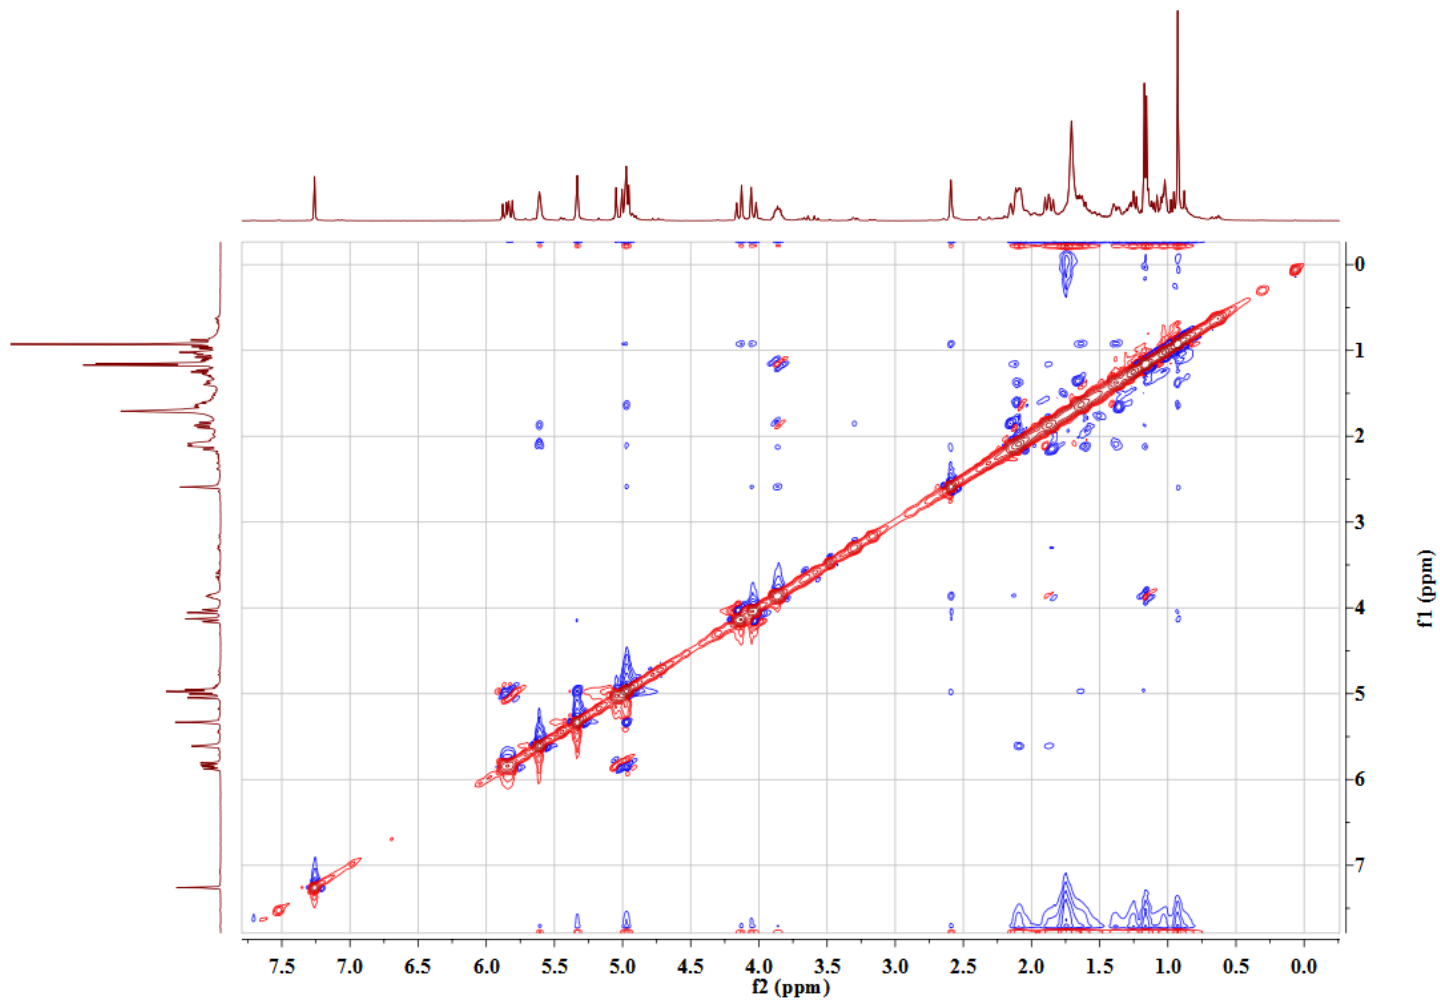

S24 <sup>1</sup>H NMR Spectrum of **4** in CDCl<sub>3</sub>

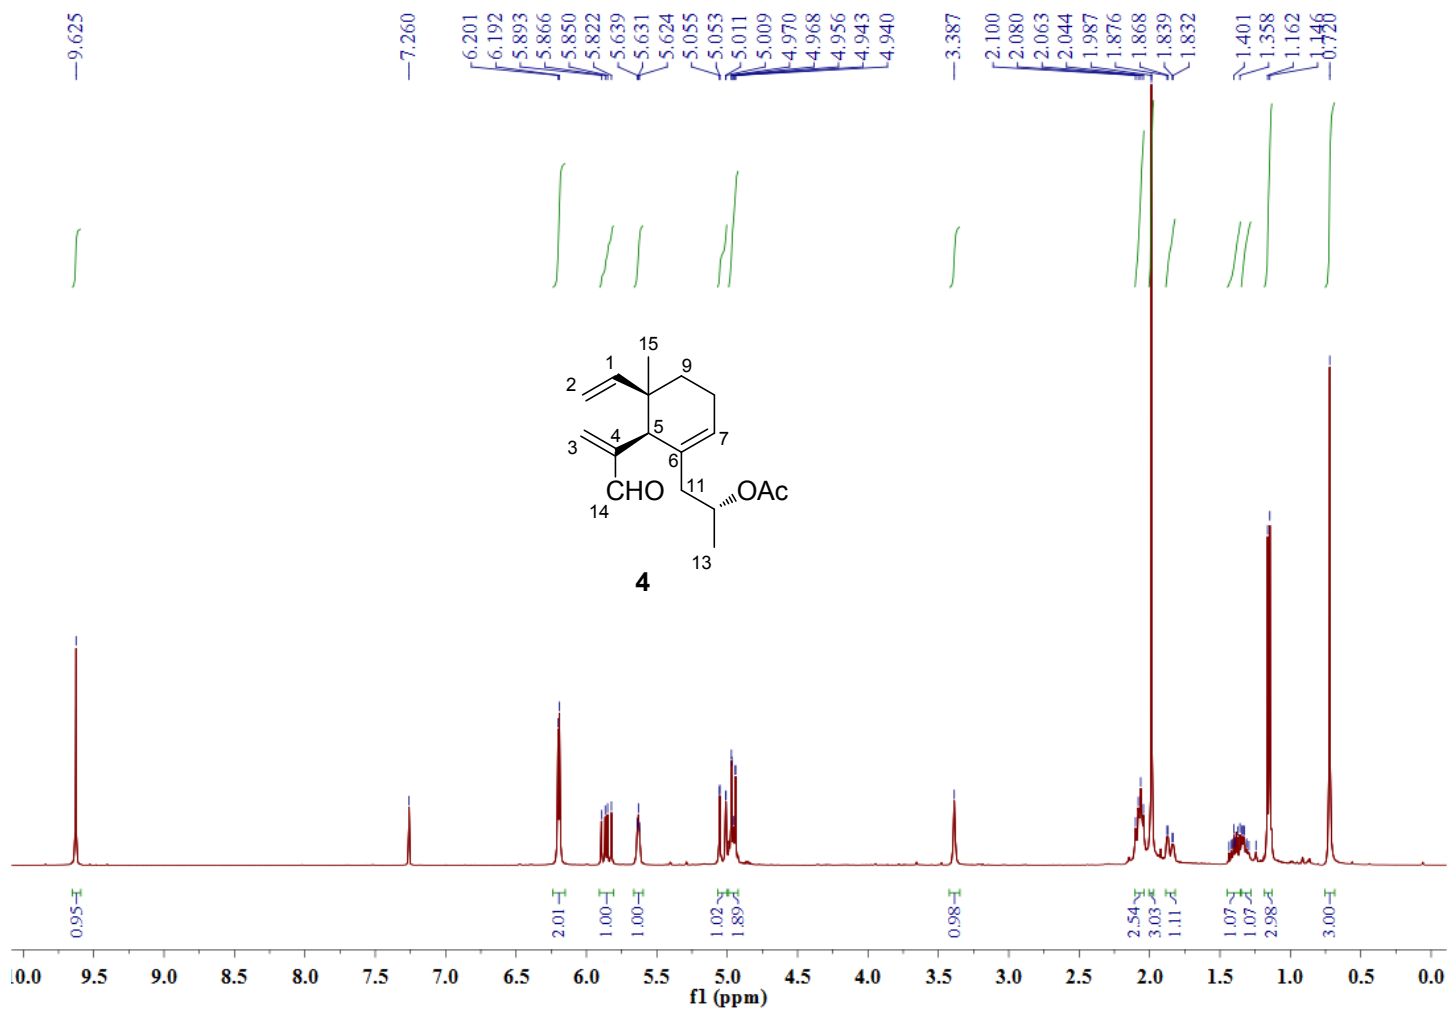



S25  $^{13}\text{C}$  NMR Spectra of **4** in  $\text{CDCl}_3$

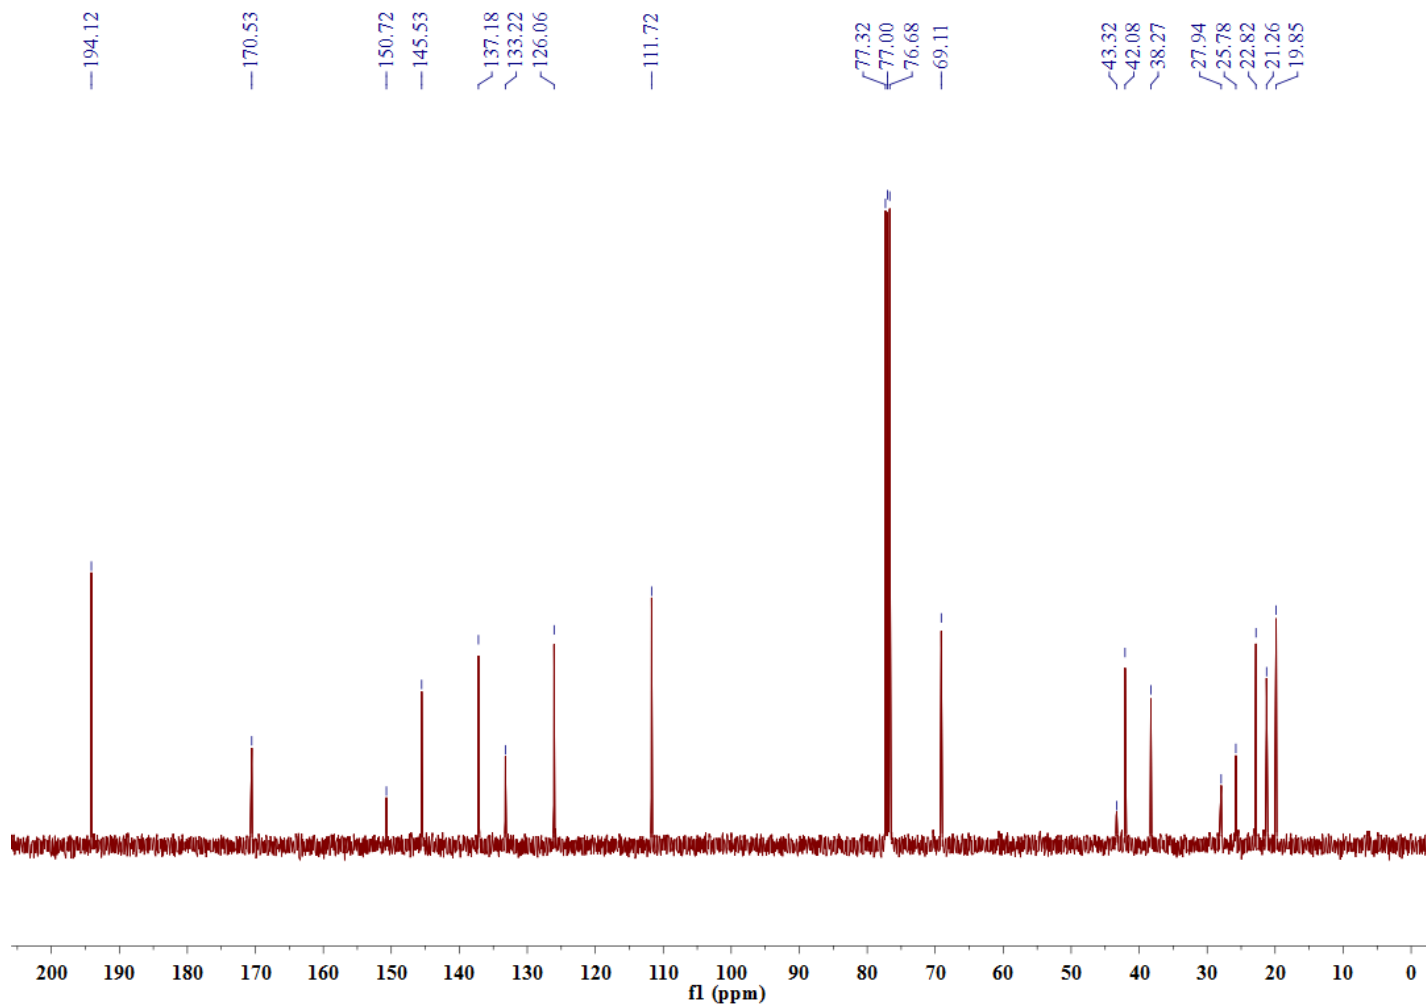

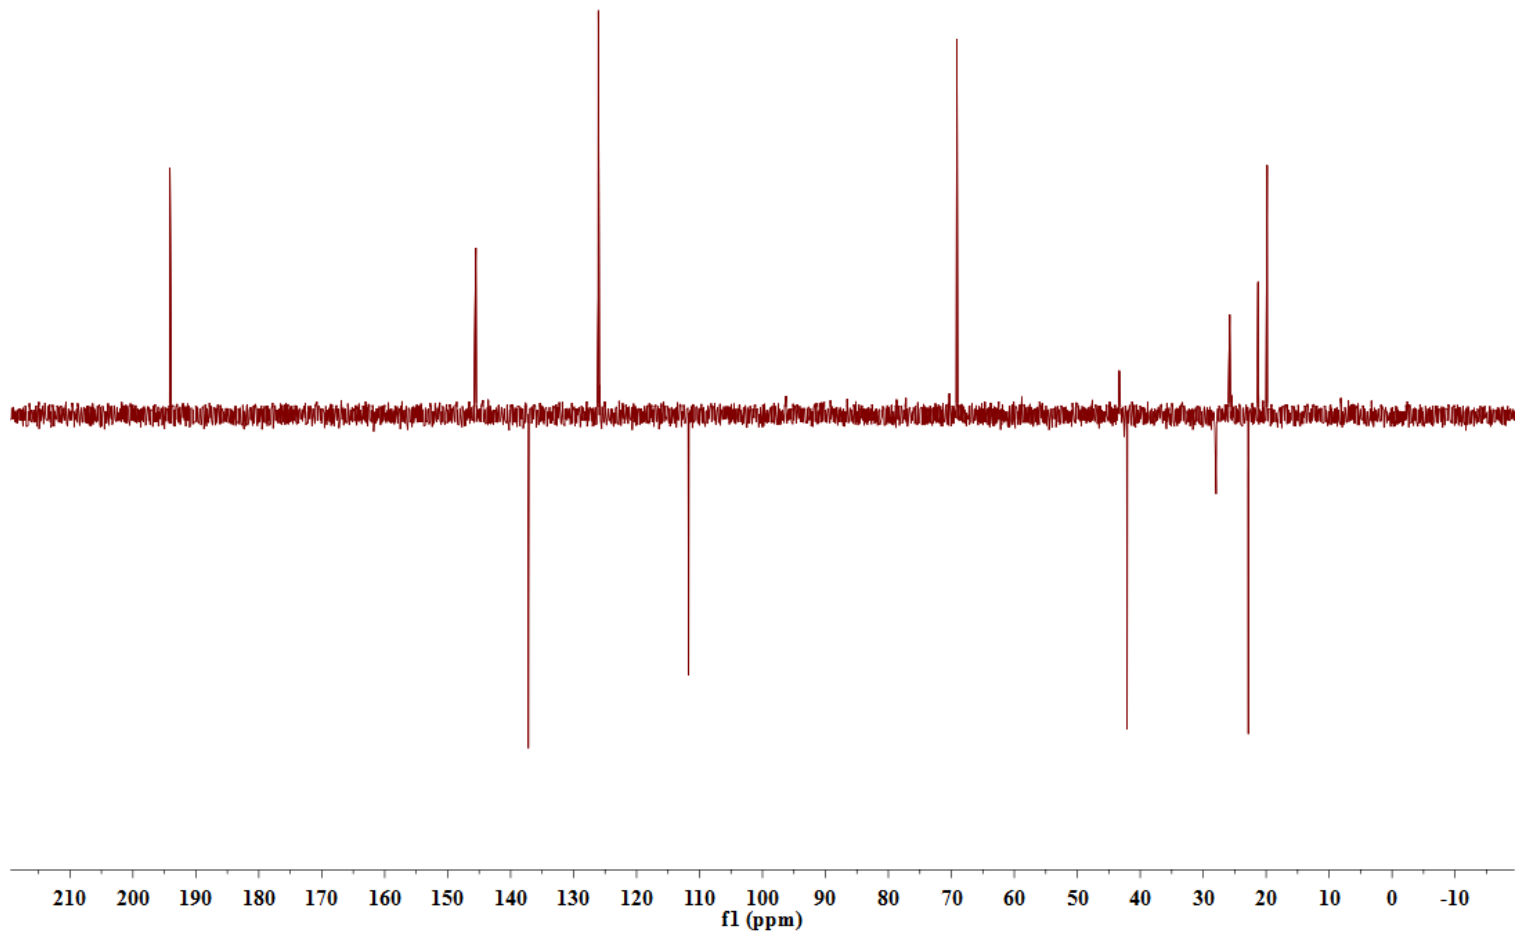

S26  $^1\text{H}$ - $^1\text{H}$  COSY Spectrum of **4** in  $\text{CDCl}_3$

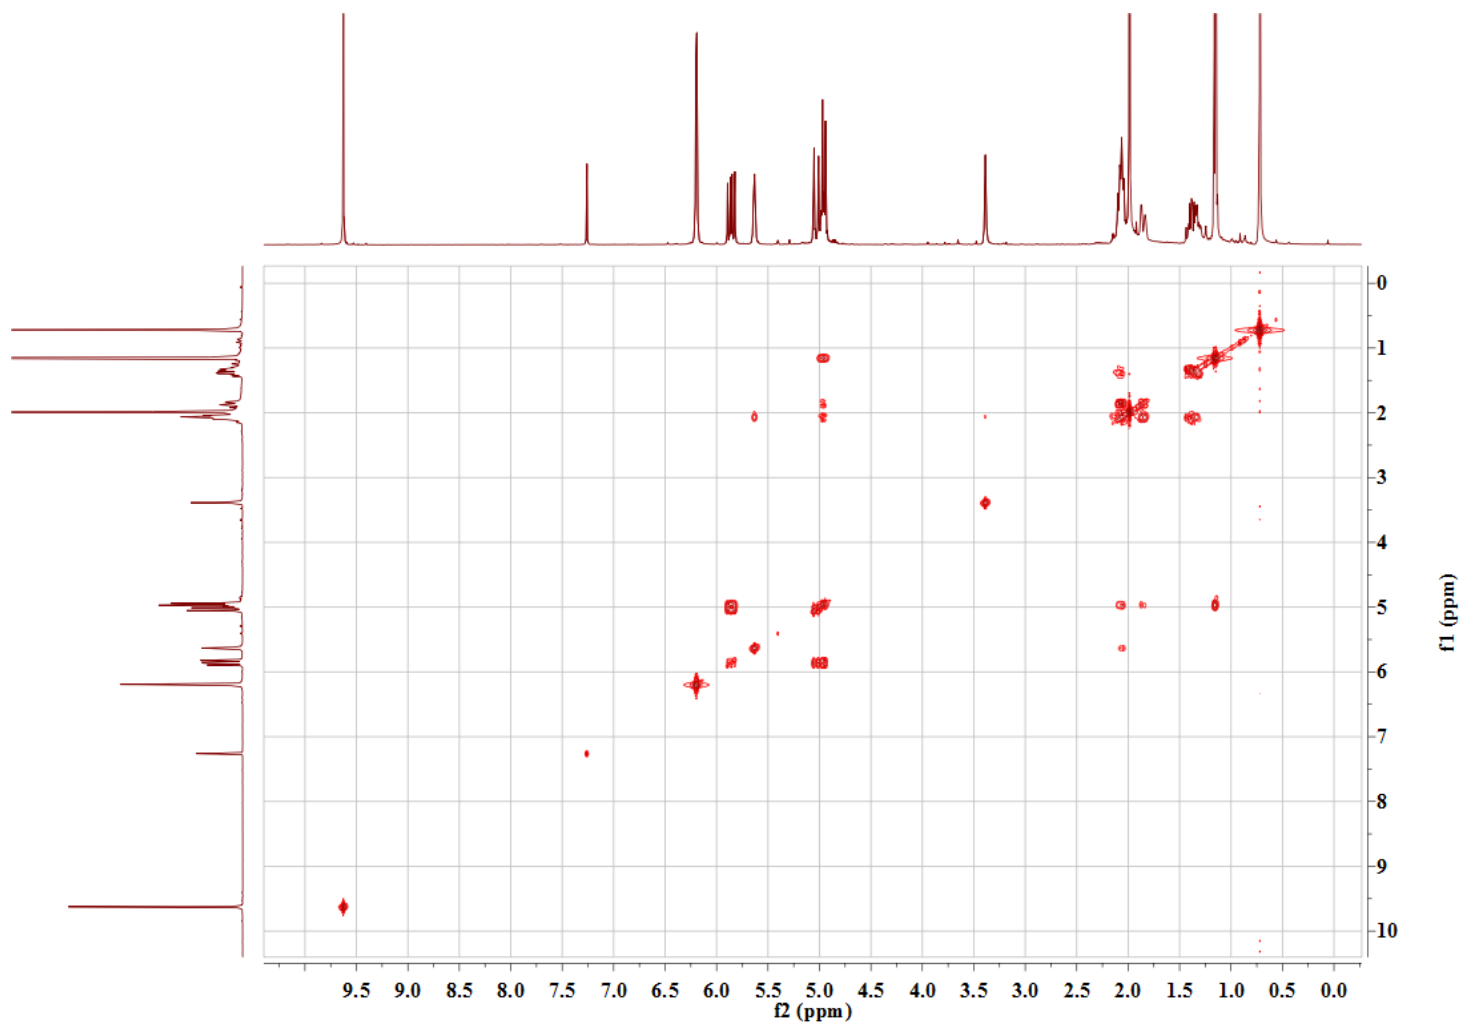

S27 HSQC Spectrum of 4 in CDCl<sub>3</sub>

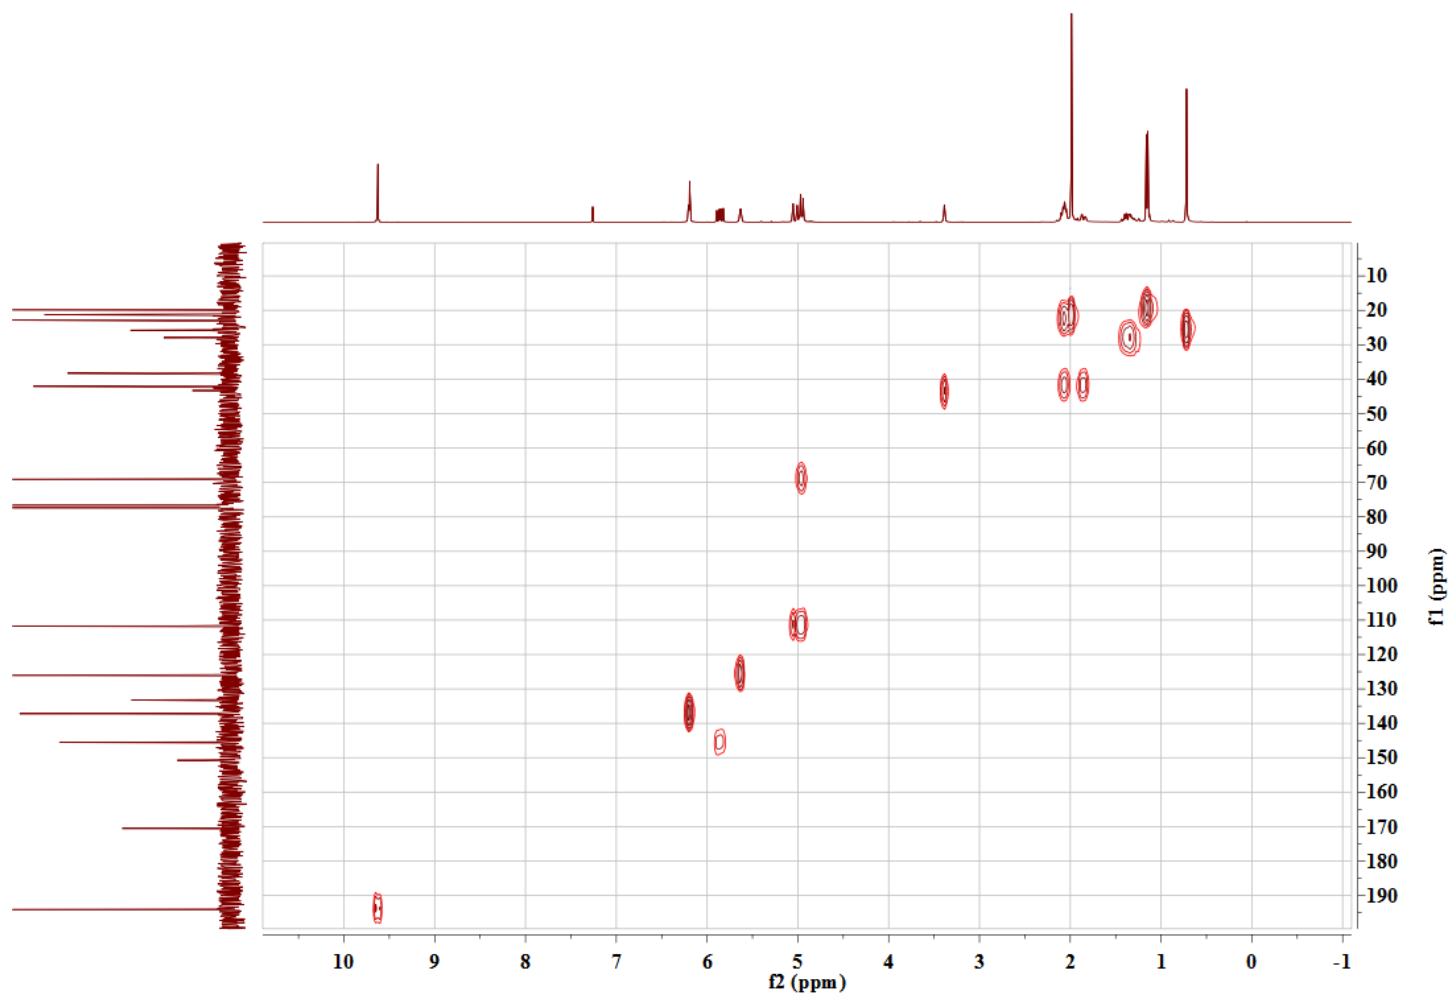

S28 HMBC Spectrum of **4** in CDCl<sub>3</sub>

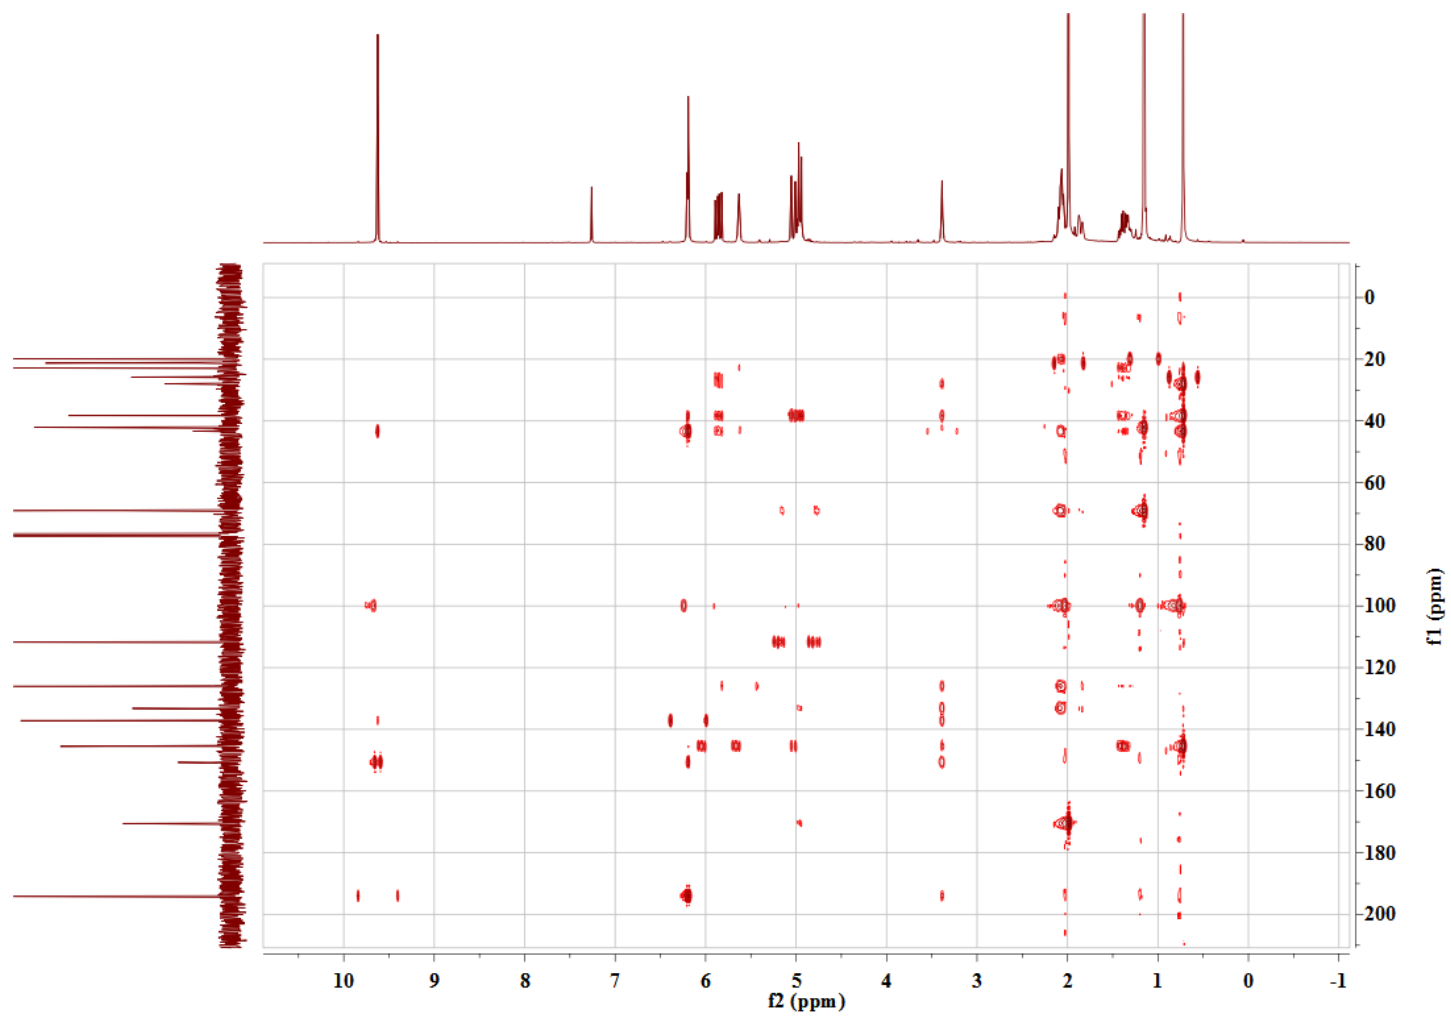

S29 NOESY Spectrum of 4 in CDCl<sub>3</sub>

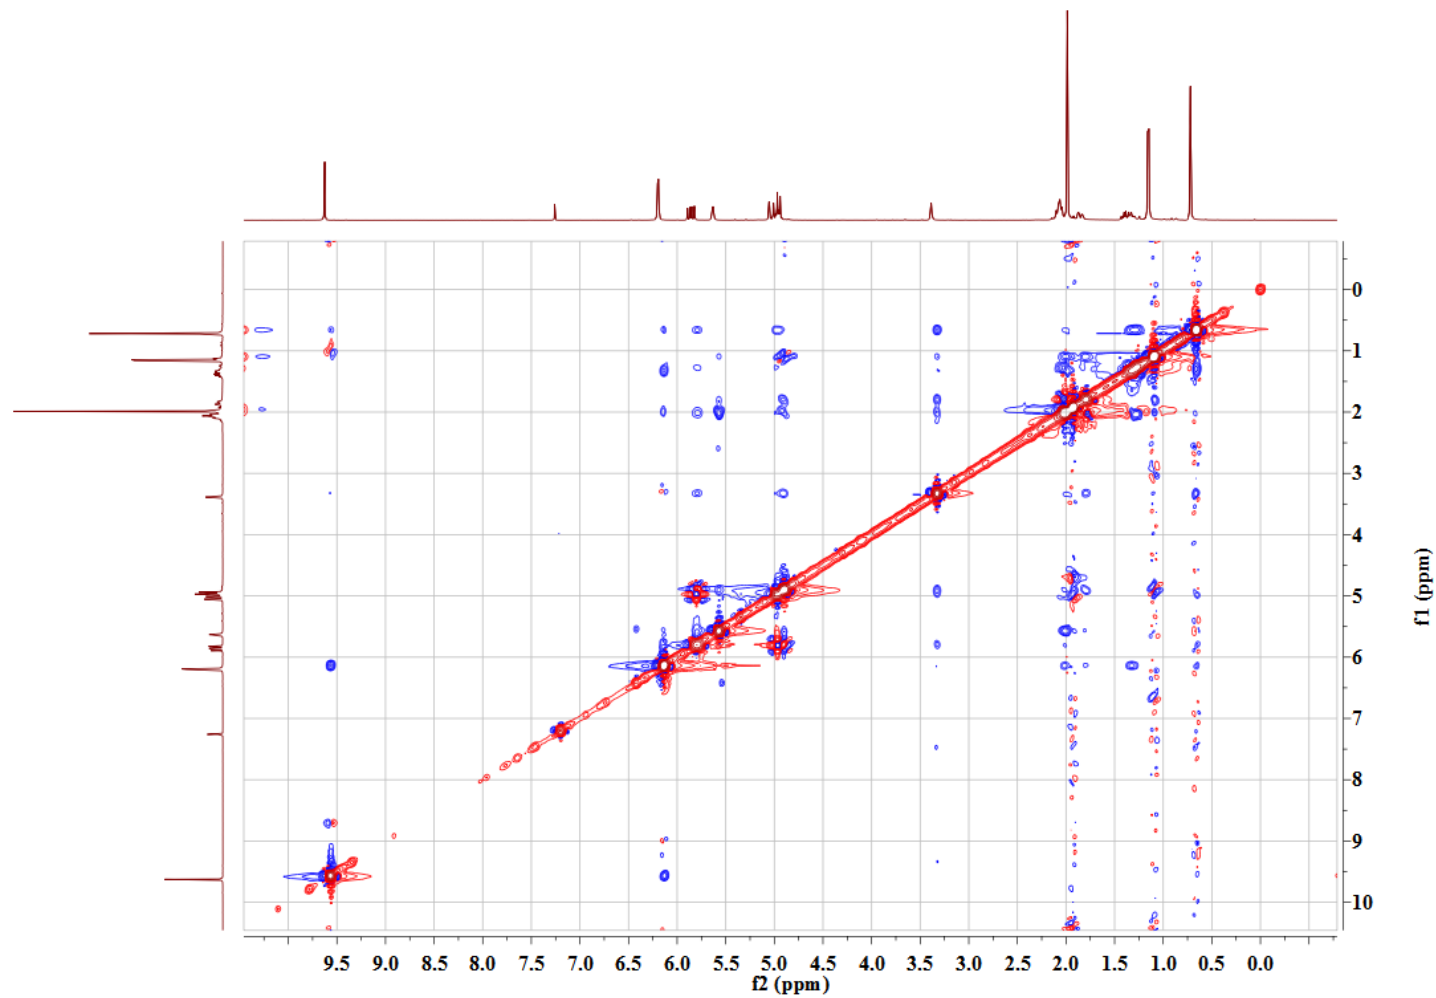

S30  $^1\text{H}$  NMR Spectrum of **5** in  $\text{CDCl}_3$

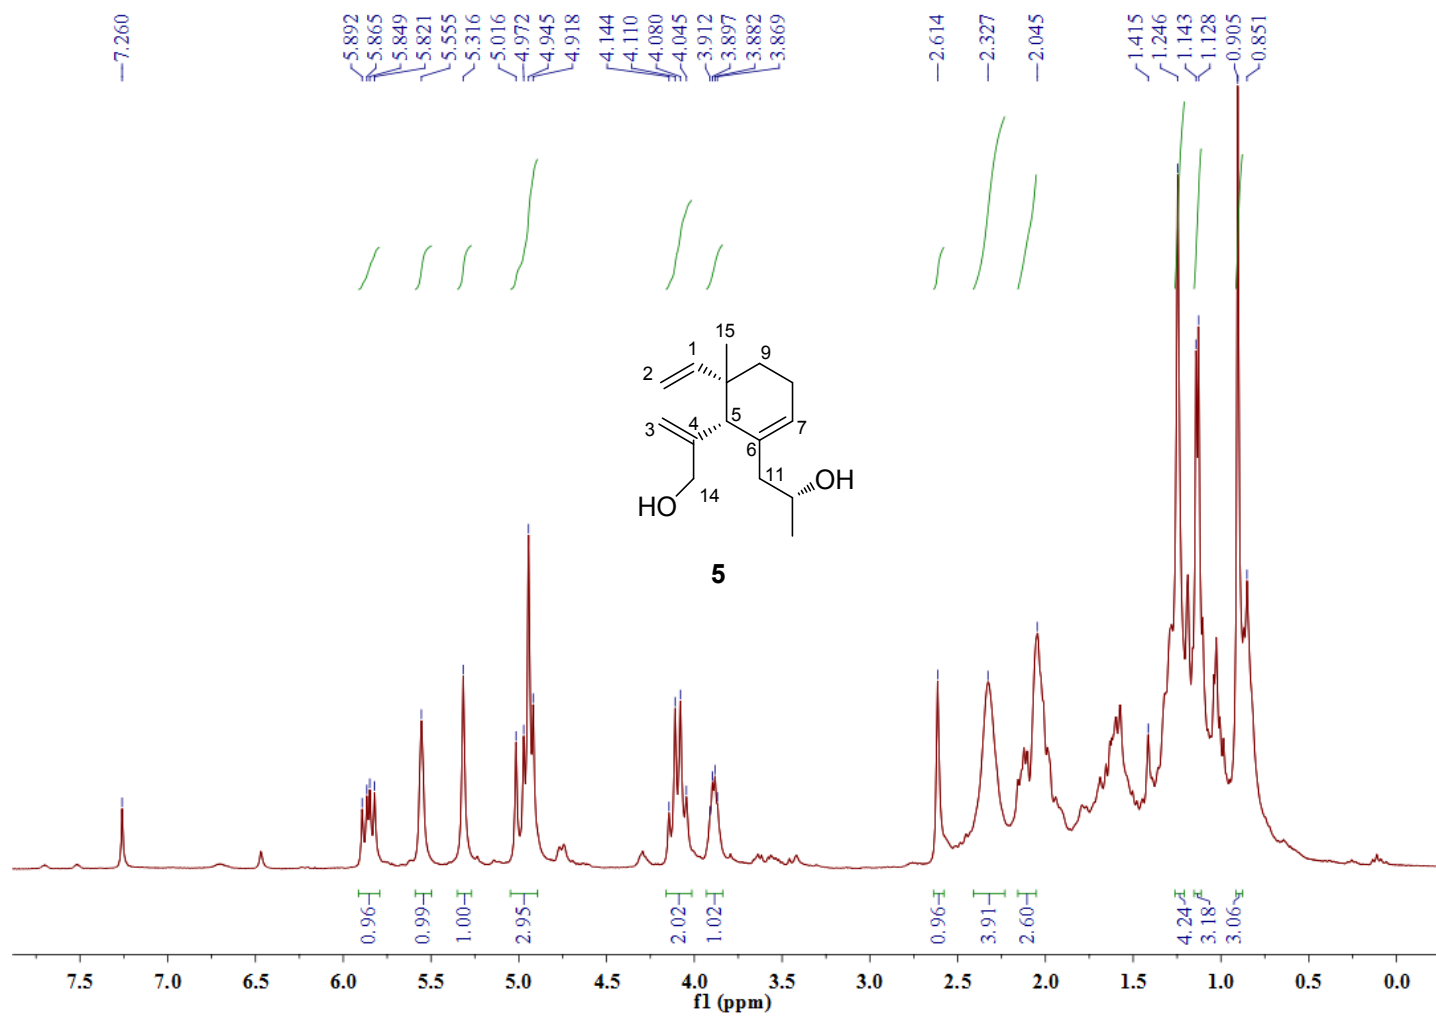

**S31**  $^{13}\text{C}$  NMR Spectra of **5** in  $\text{CDCl}_3$

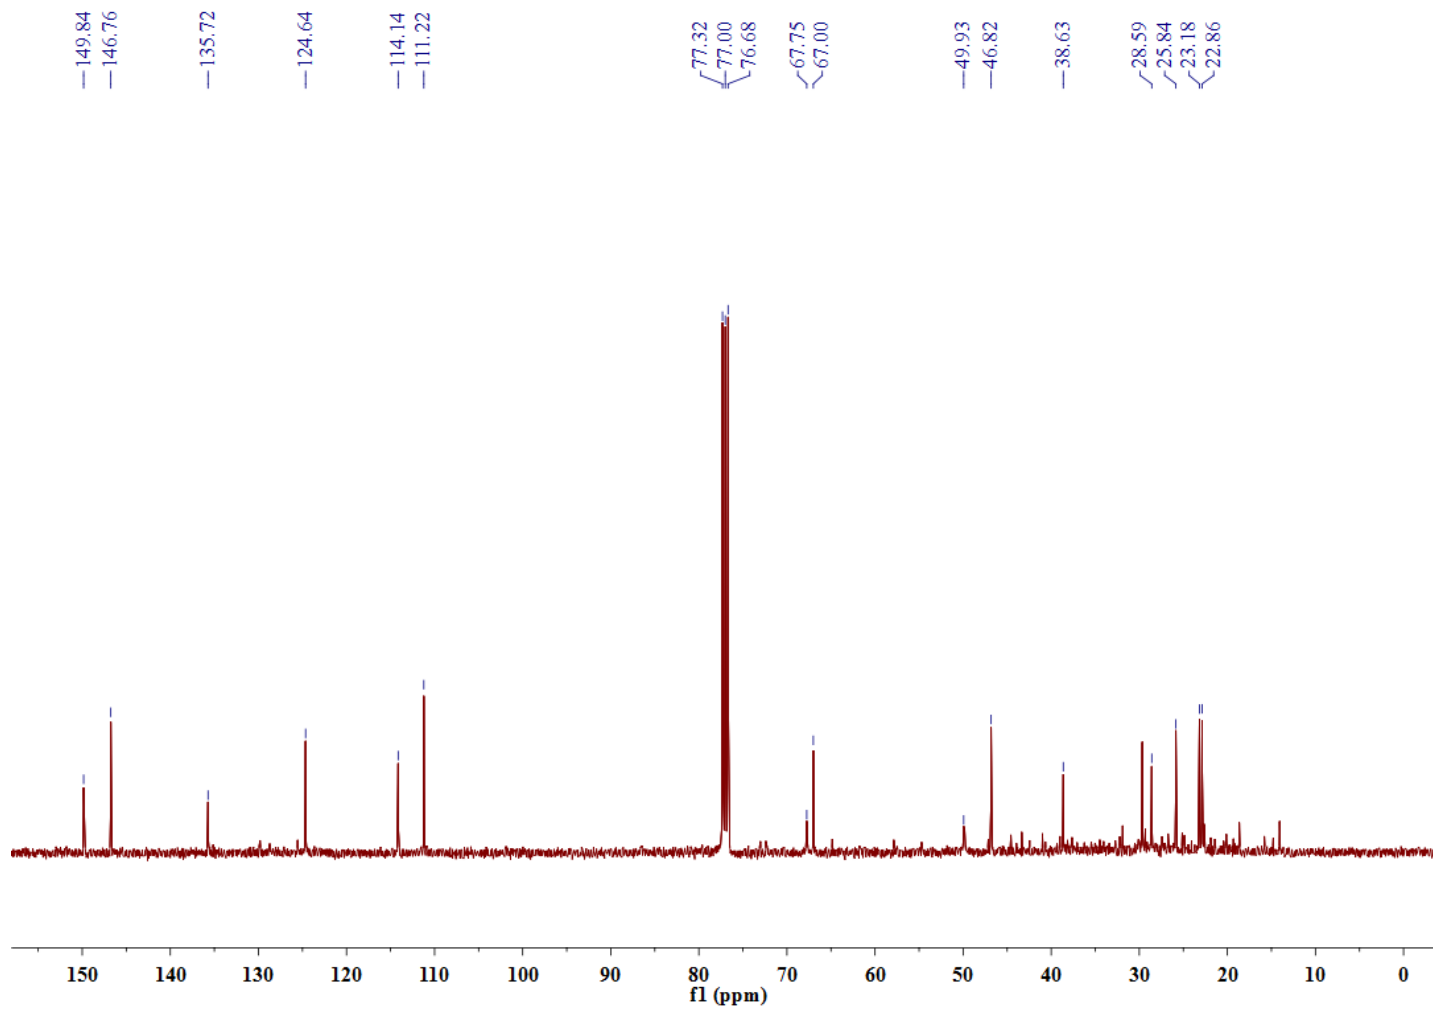



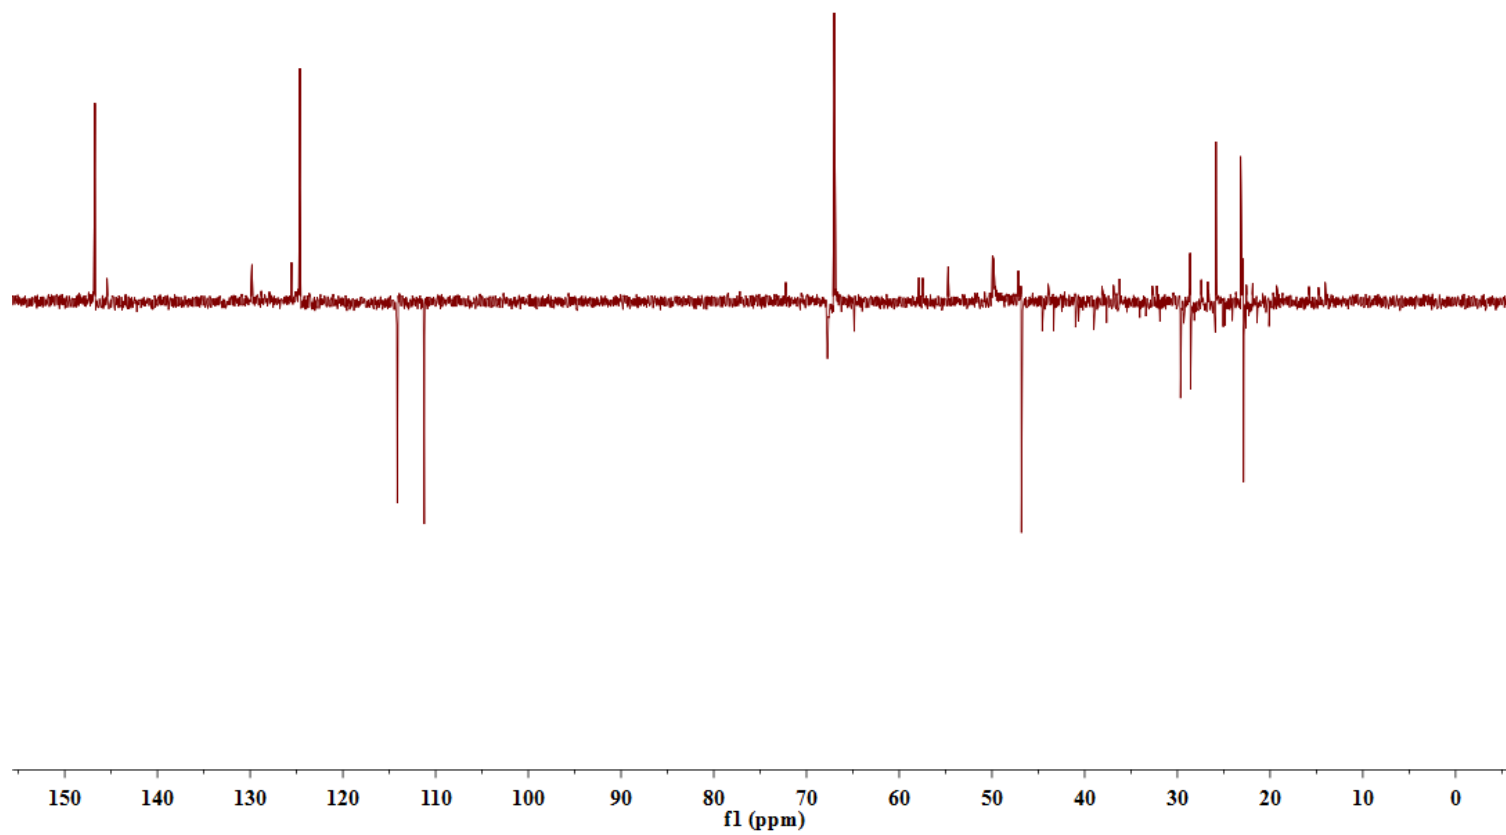

S32  $^1\text{H}$ - $^1\text{H}$  COSY Spectrum of **5** in  $\text{CDCl}_3$

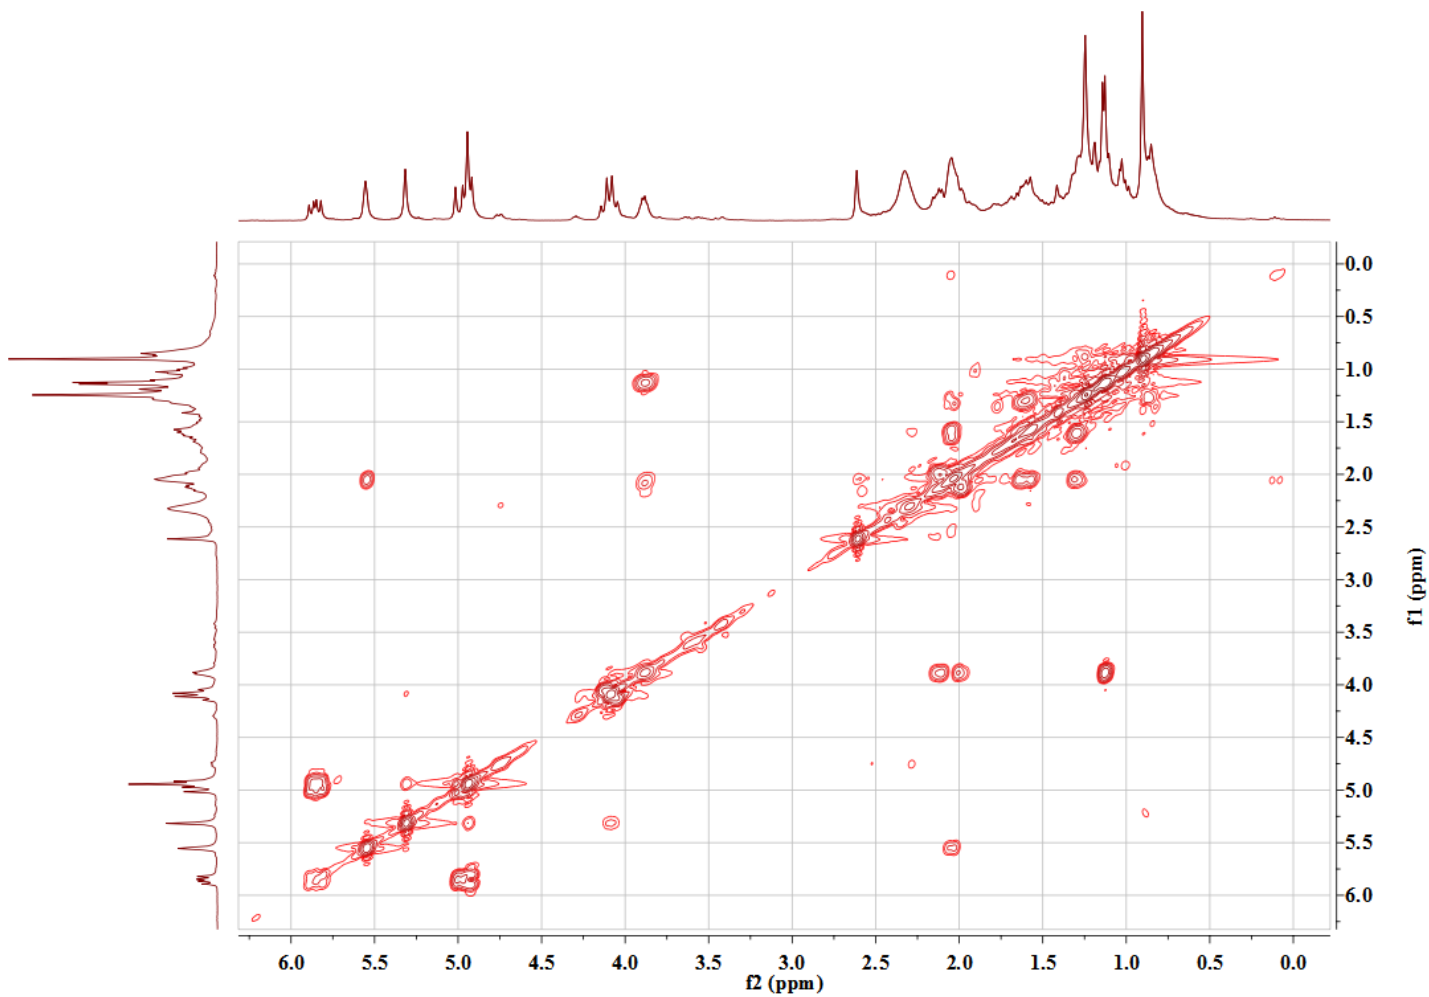

S33 HSQC Spectrum of 5 in CDCl<sub>3</sub>

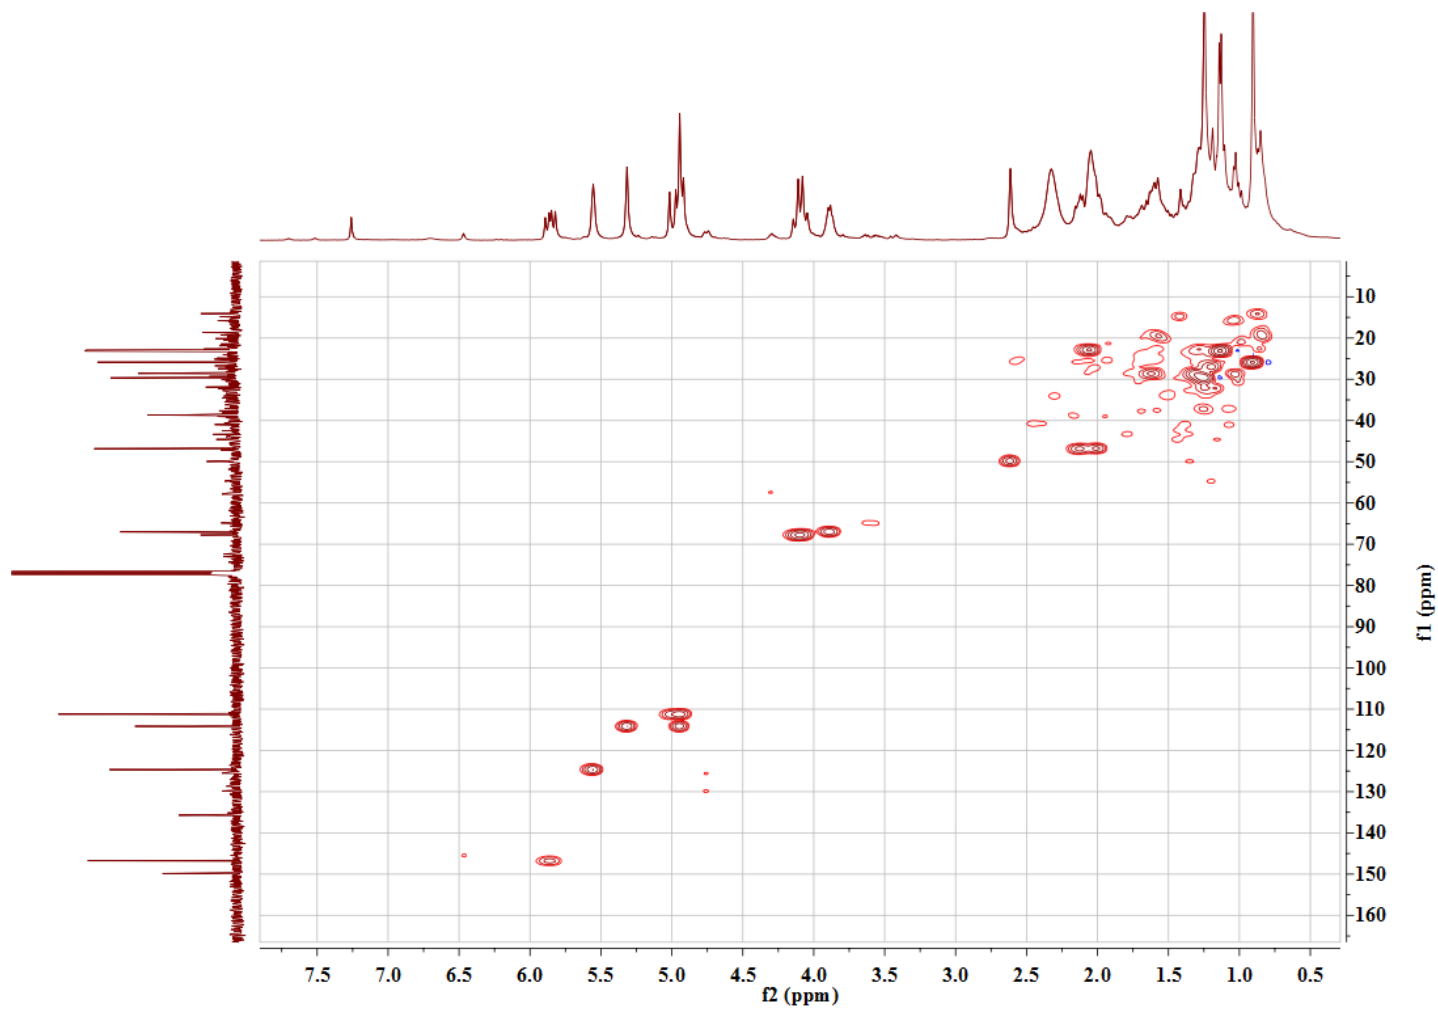

S34 HMBC Spectrum of 5 in CDCl<sub>3</sub>

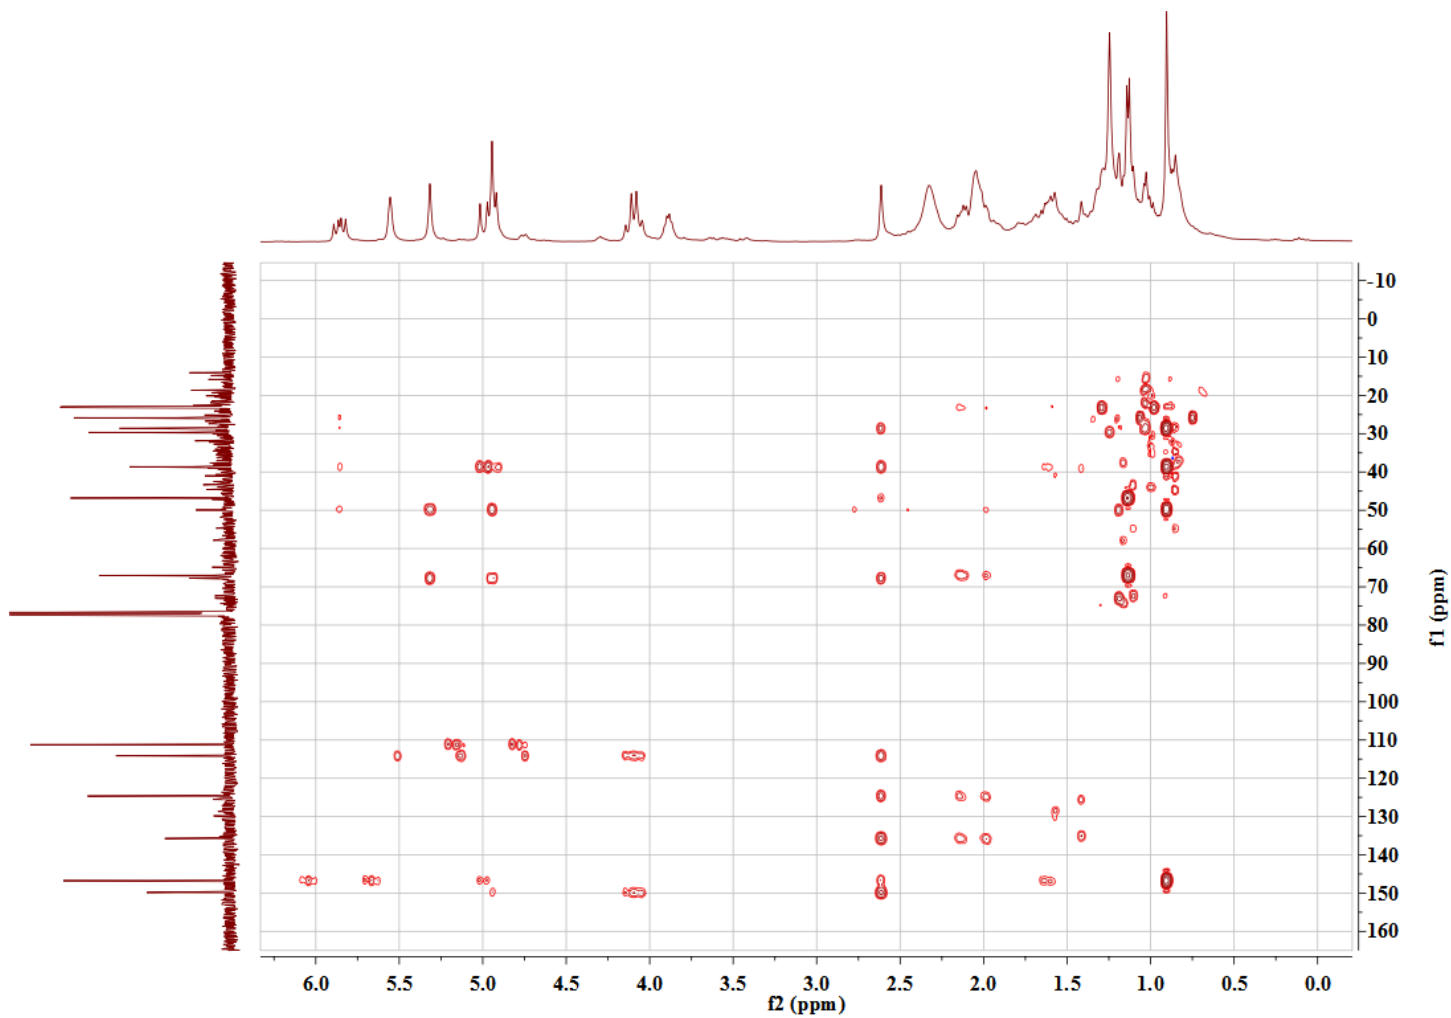

S35 NOESY Spectrum of **5** in CDCl<sub>3</sub>

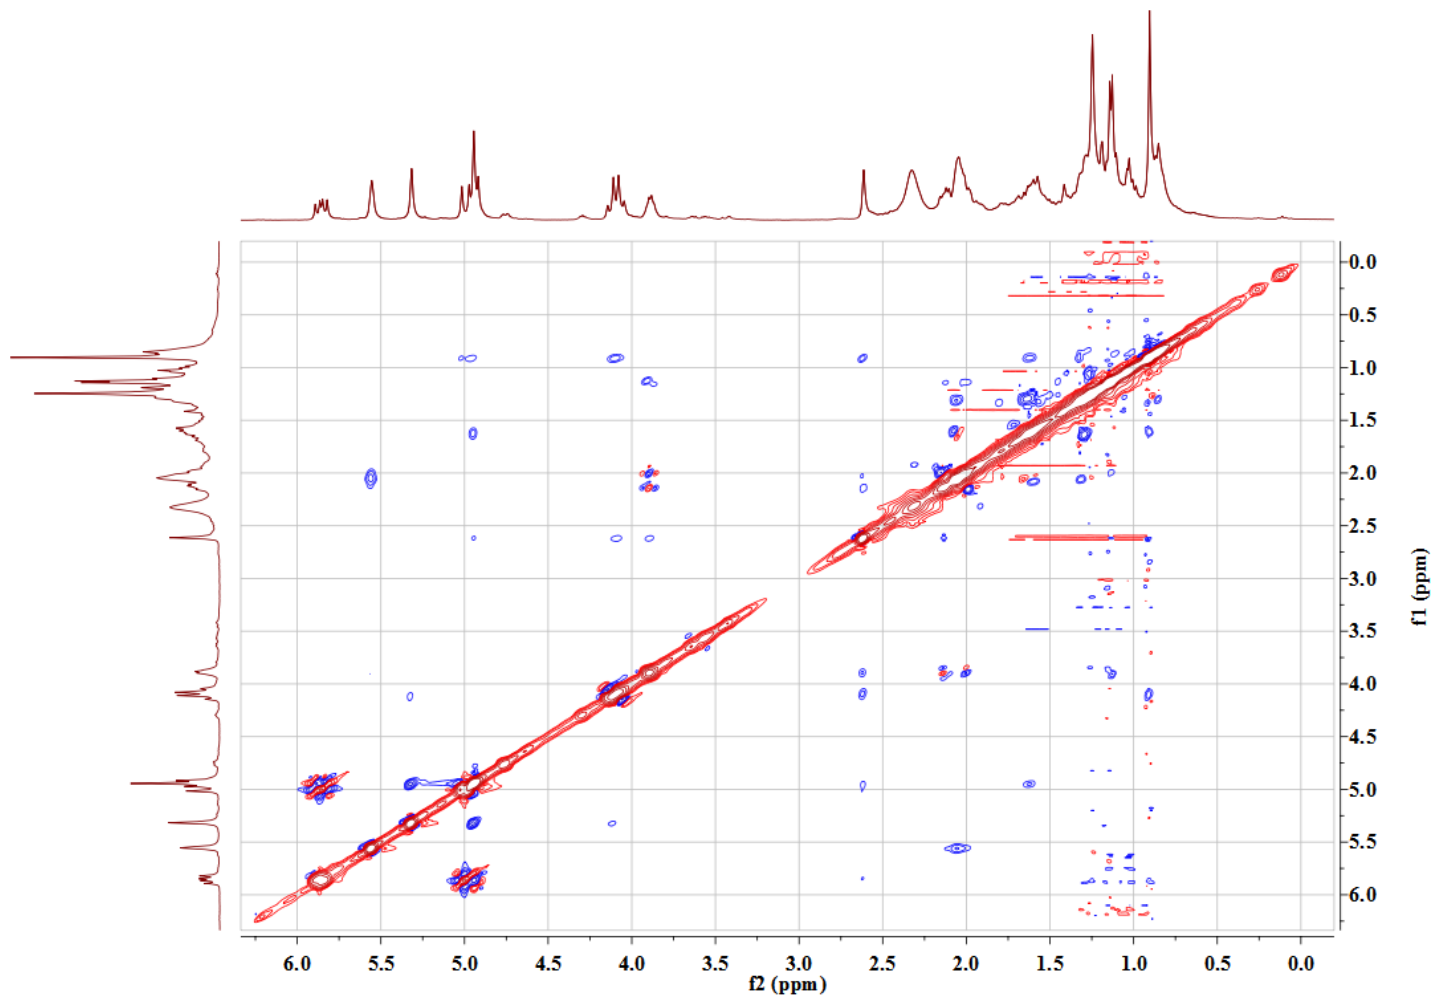

S36  $^1\text{H}$  NMR Spectrum of **6** in  $\text{CDCl}_3$

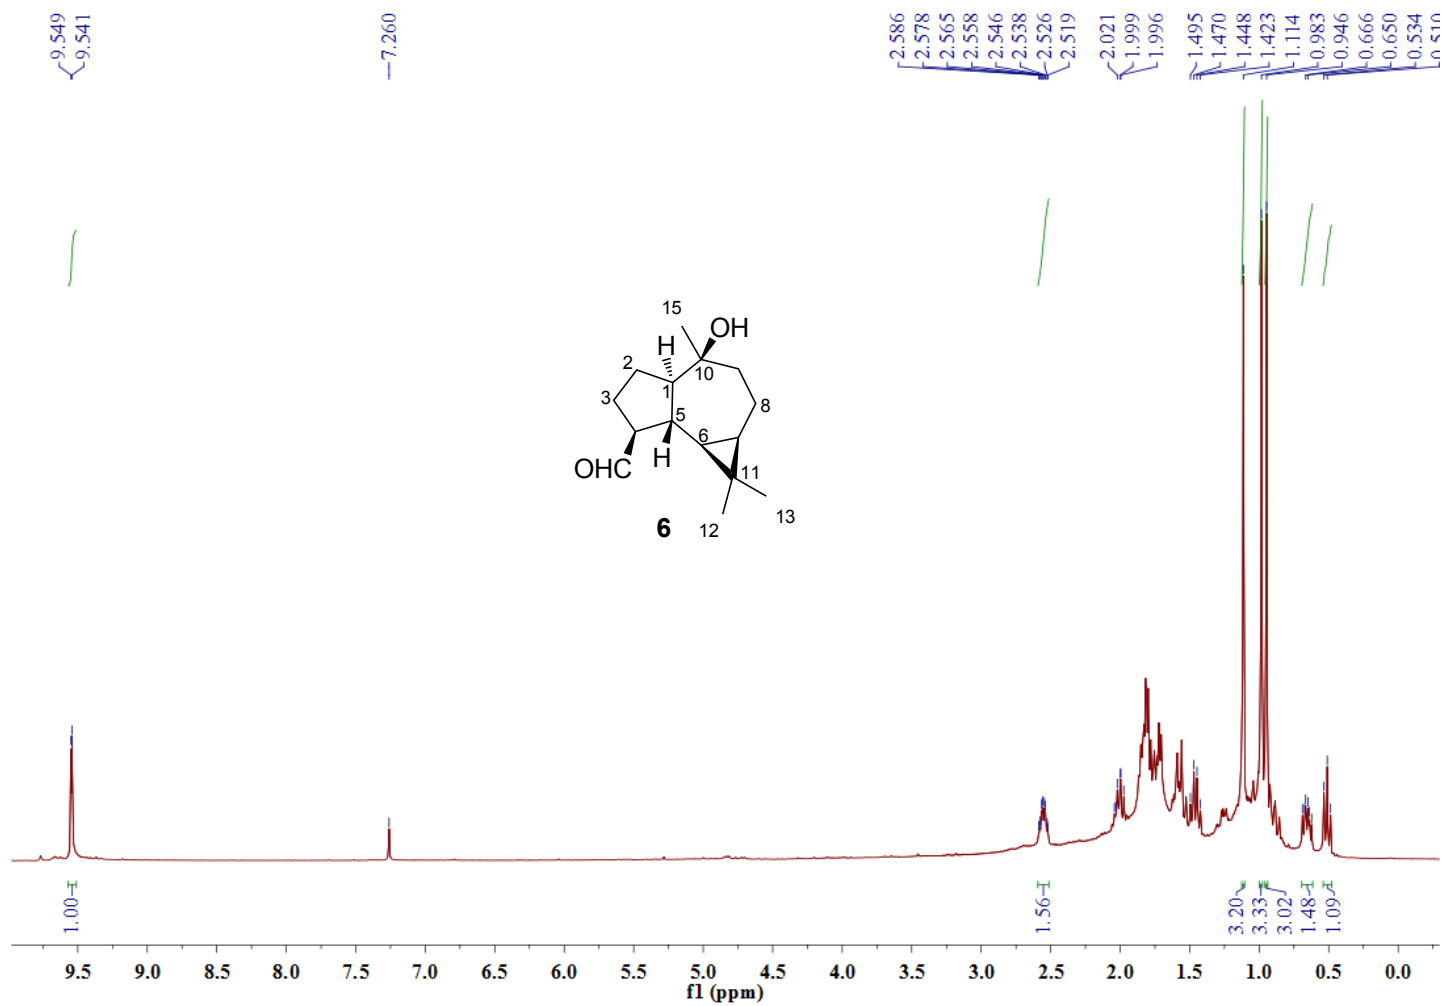

S37  $^{13}\text{C}$  NMR Spectra of **6** in  $\text{CDCl}_3$

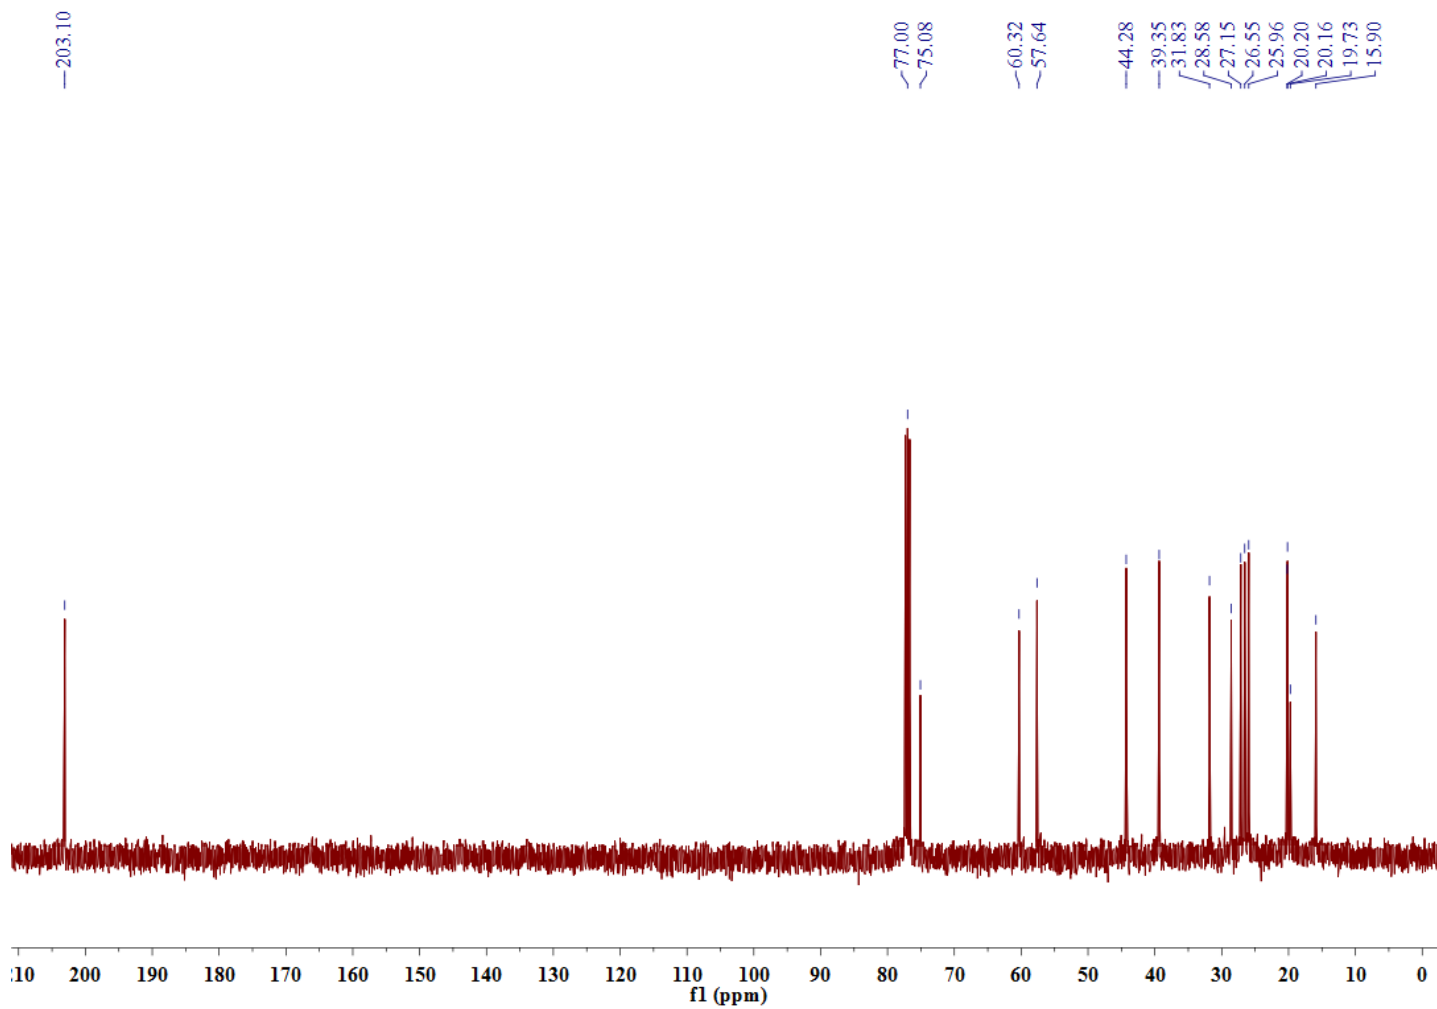

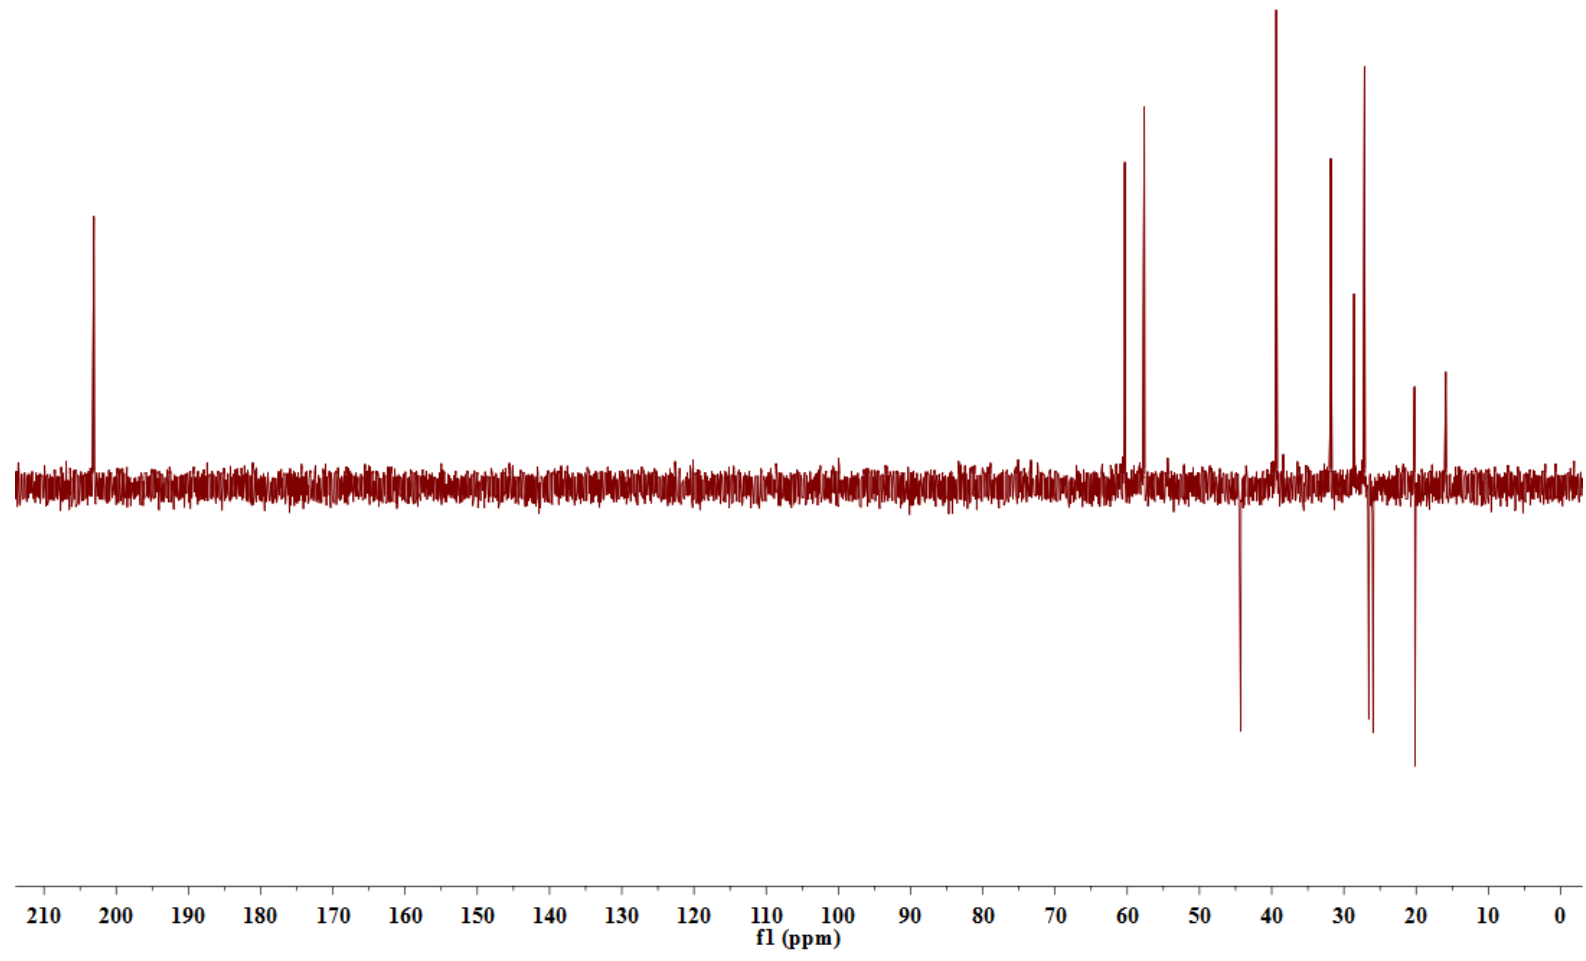



S38  $^1\text{H}$ - $^1\text{H}$  COSY Spectrum of **6** in  $\text{CDCl}_3$

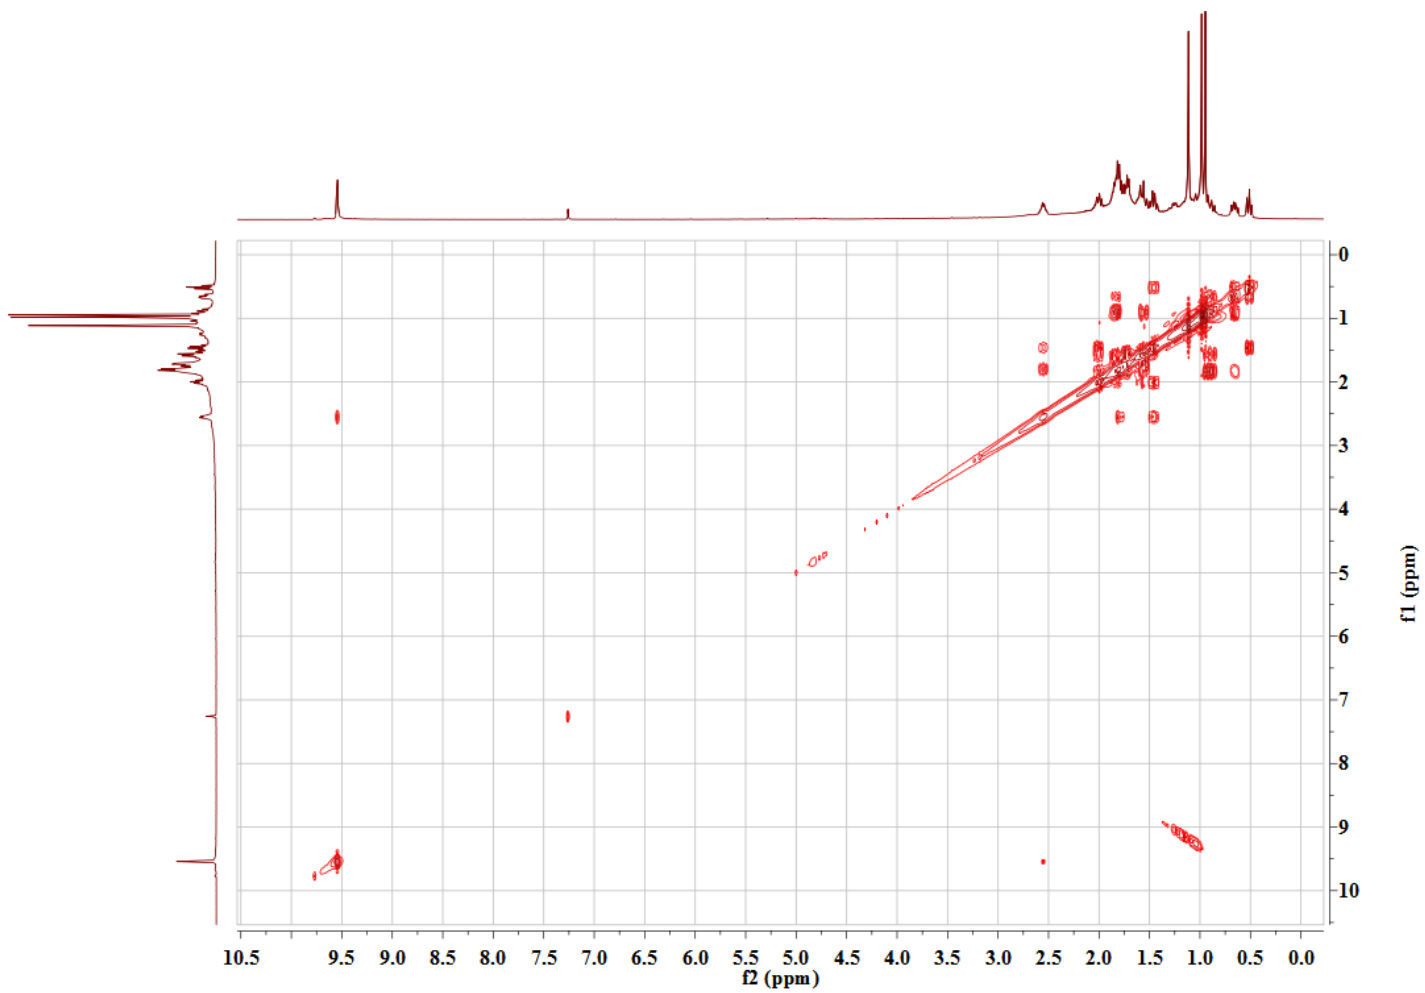

S39 HSQC Spectrum of **6** in CDCl<sub>3</sub>

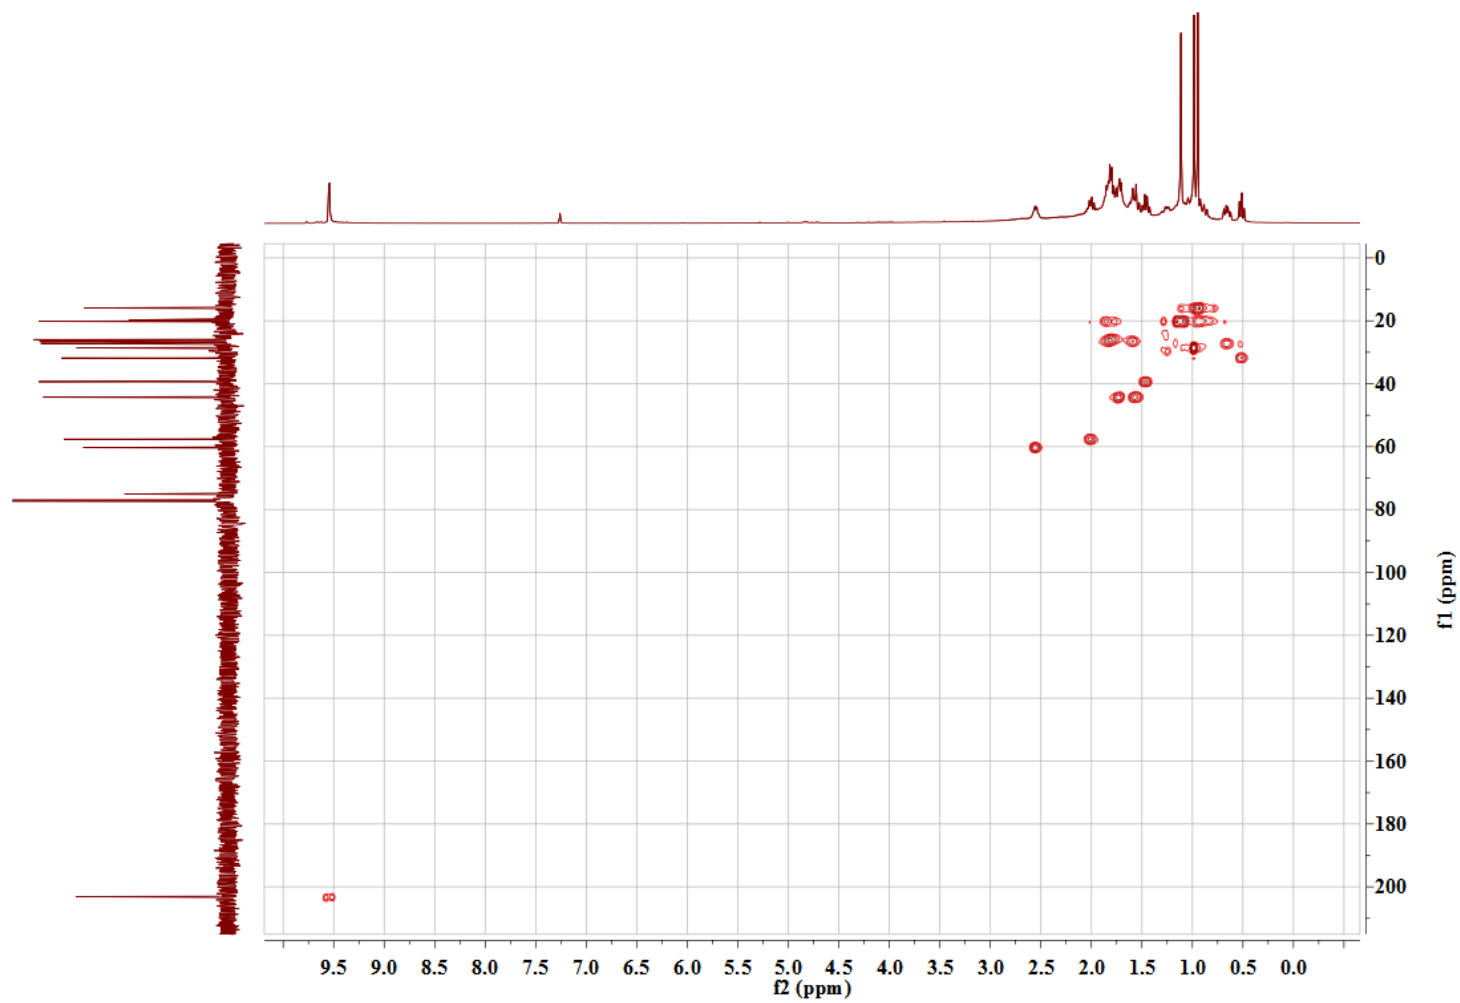

S40 HMBC Spectrum of **6** in CDCl<sub>3</sub>

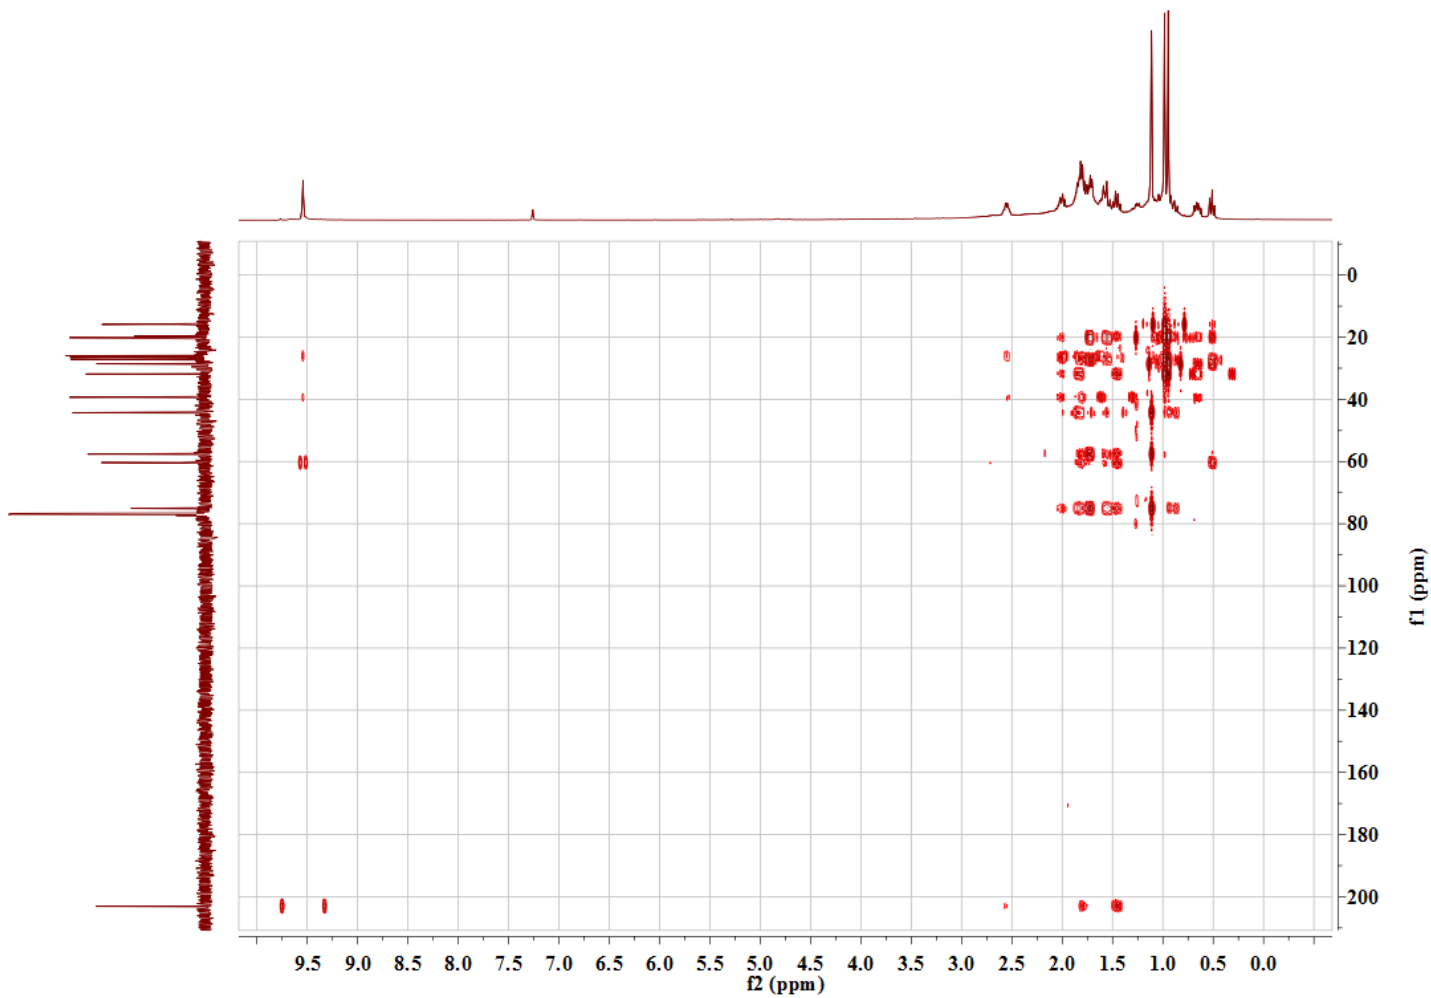

S41 NOESY Spectrum of **6** in CDCl<sub>3</sub>

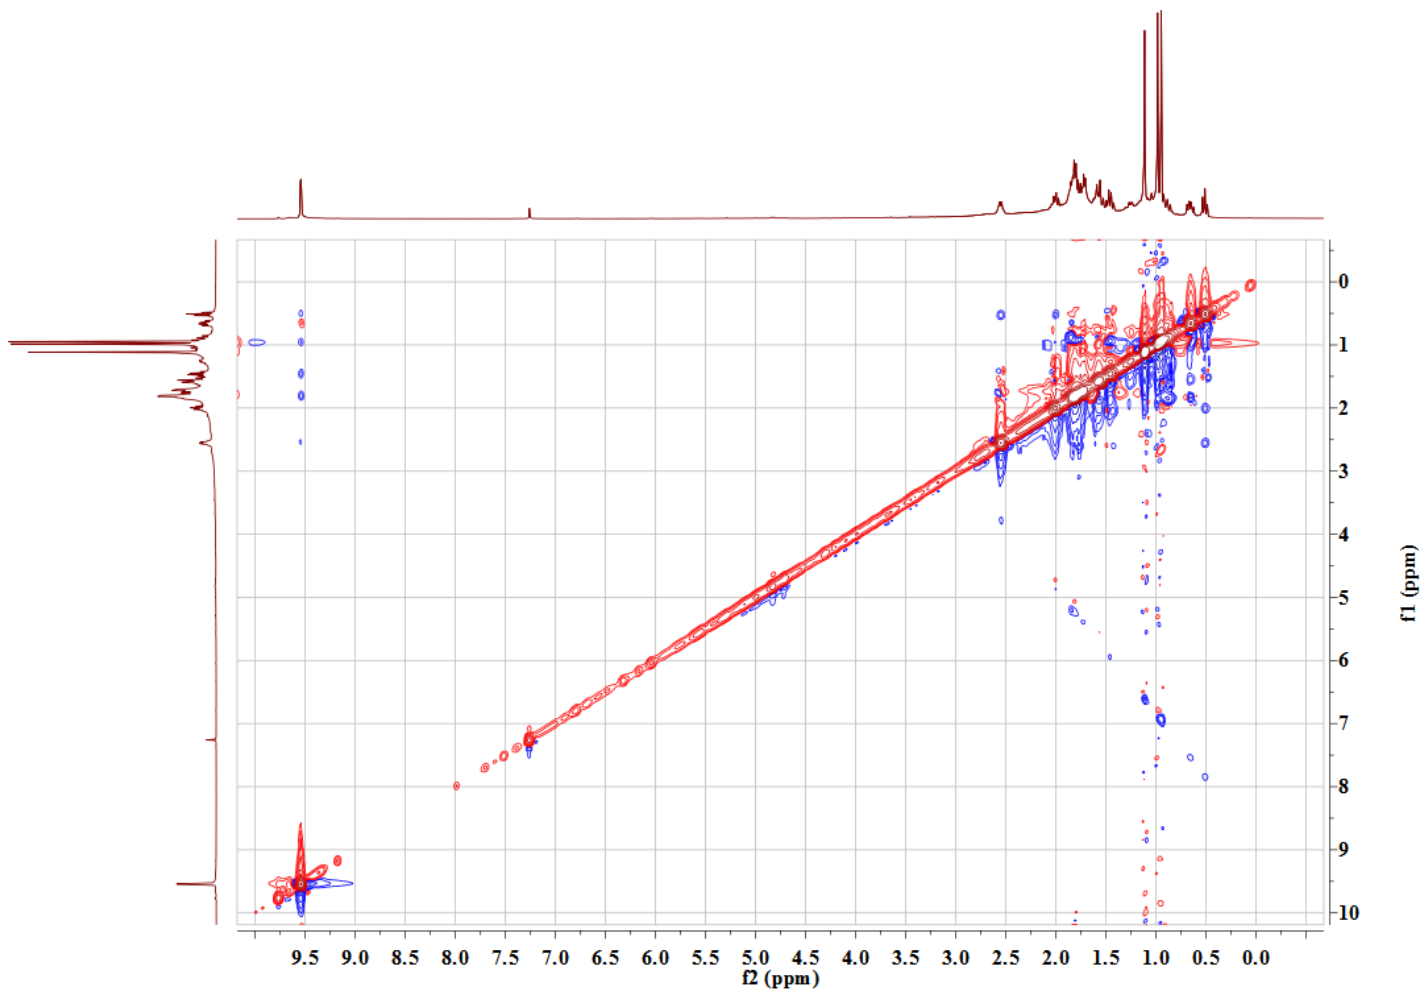

S42 <sup>1</sup>H NMR Spectrum of 7 in CDCl<sub>3</sub>

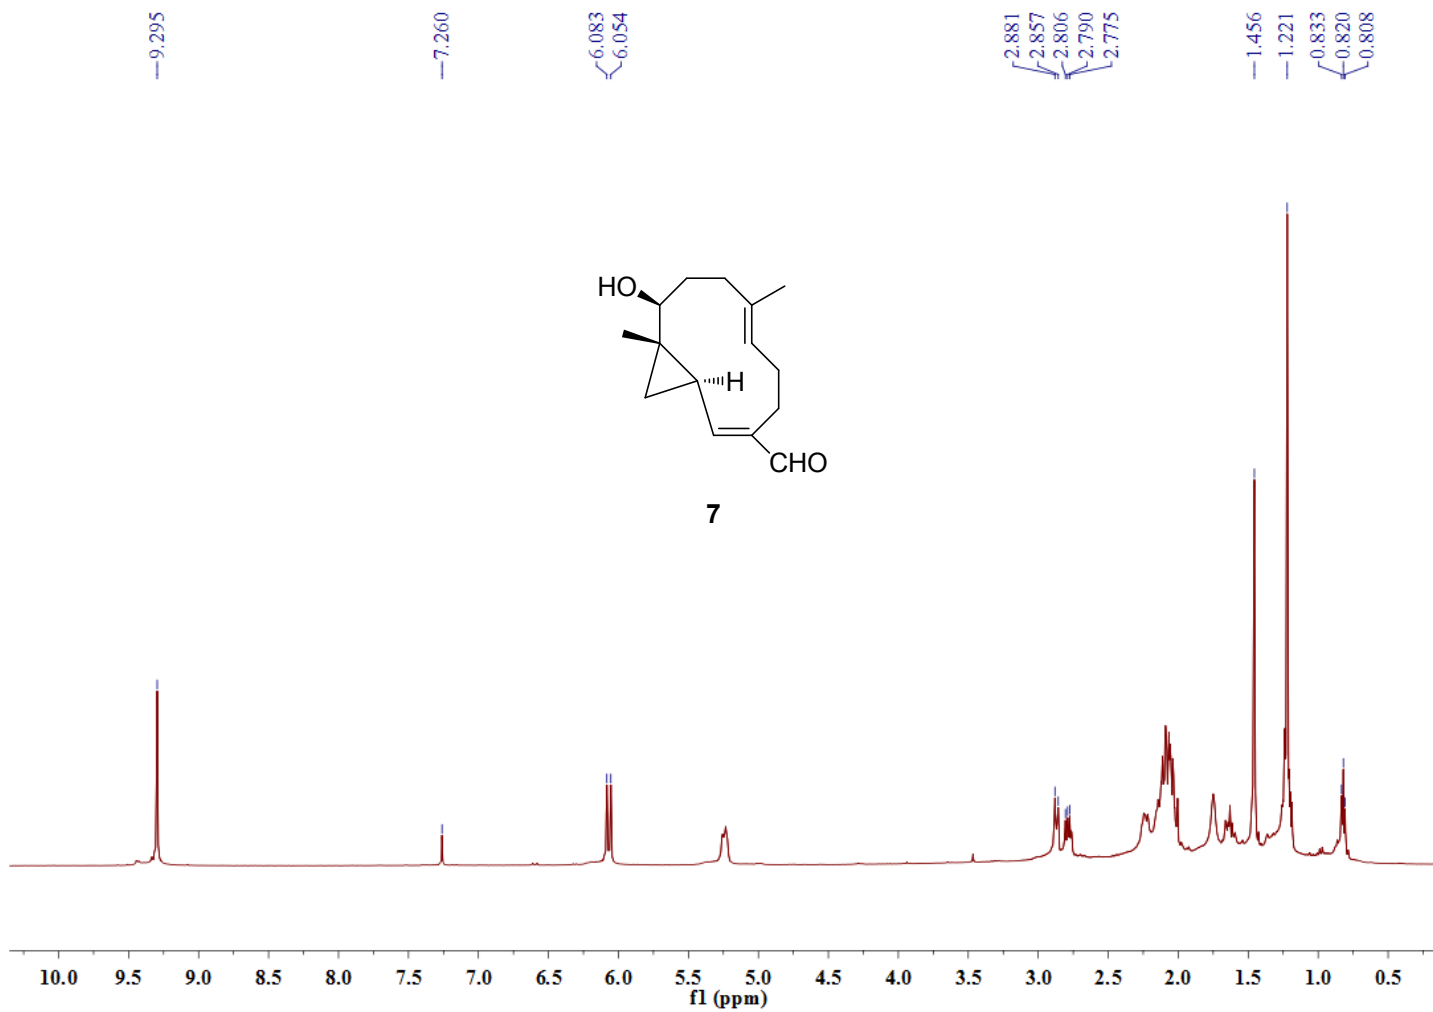

S43 <sup>1</sup>H NMR Spectrum of **8** in CDCl<sub>3</sub>

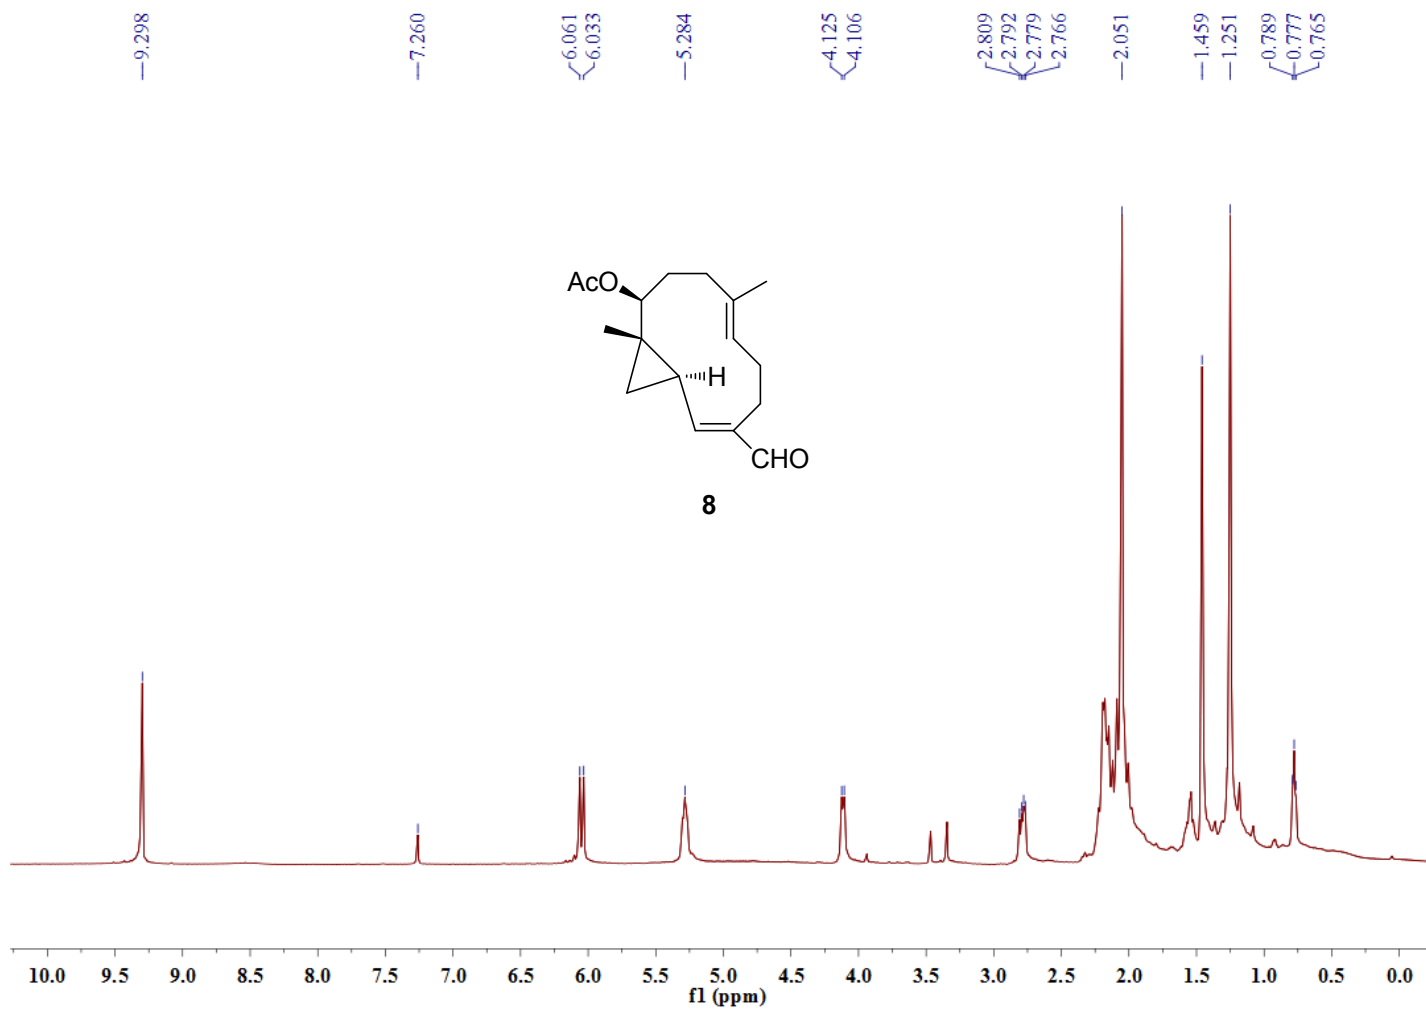

S44  $^1\text{H}$  NMR Spectrum of **9** in  $\text{CDCl}_3$

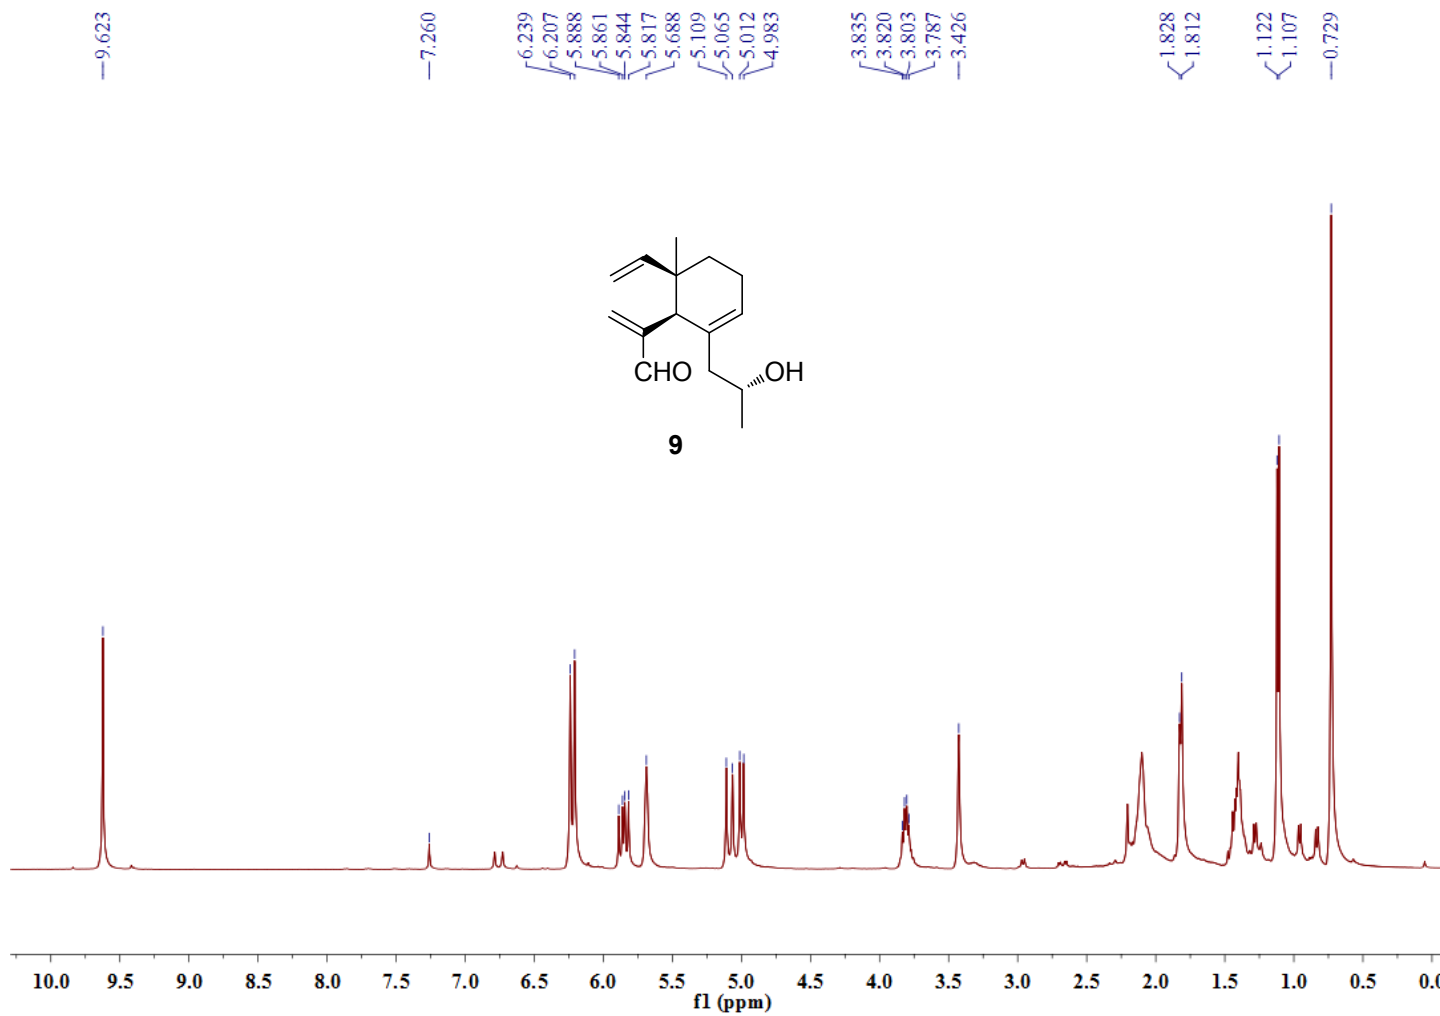

S45  $^1\text{H}$  NMR Spectrum of **10** in  $\text{CDCl}_3$

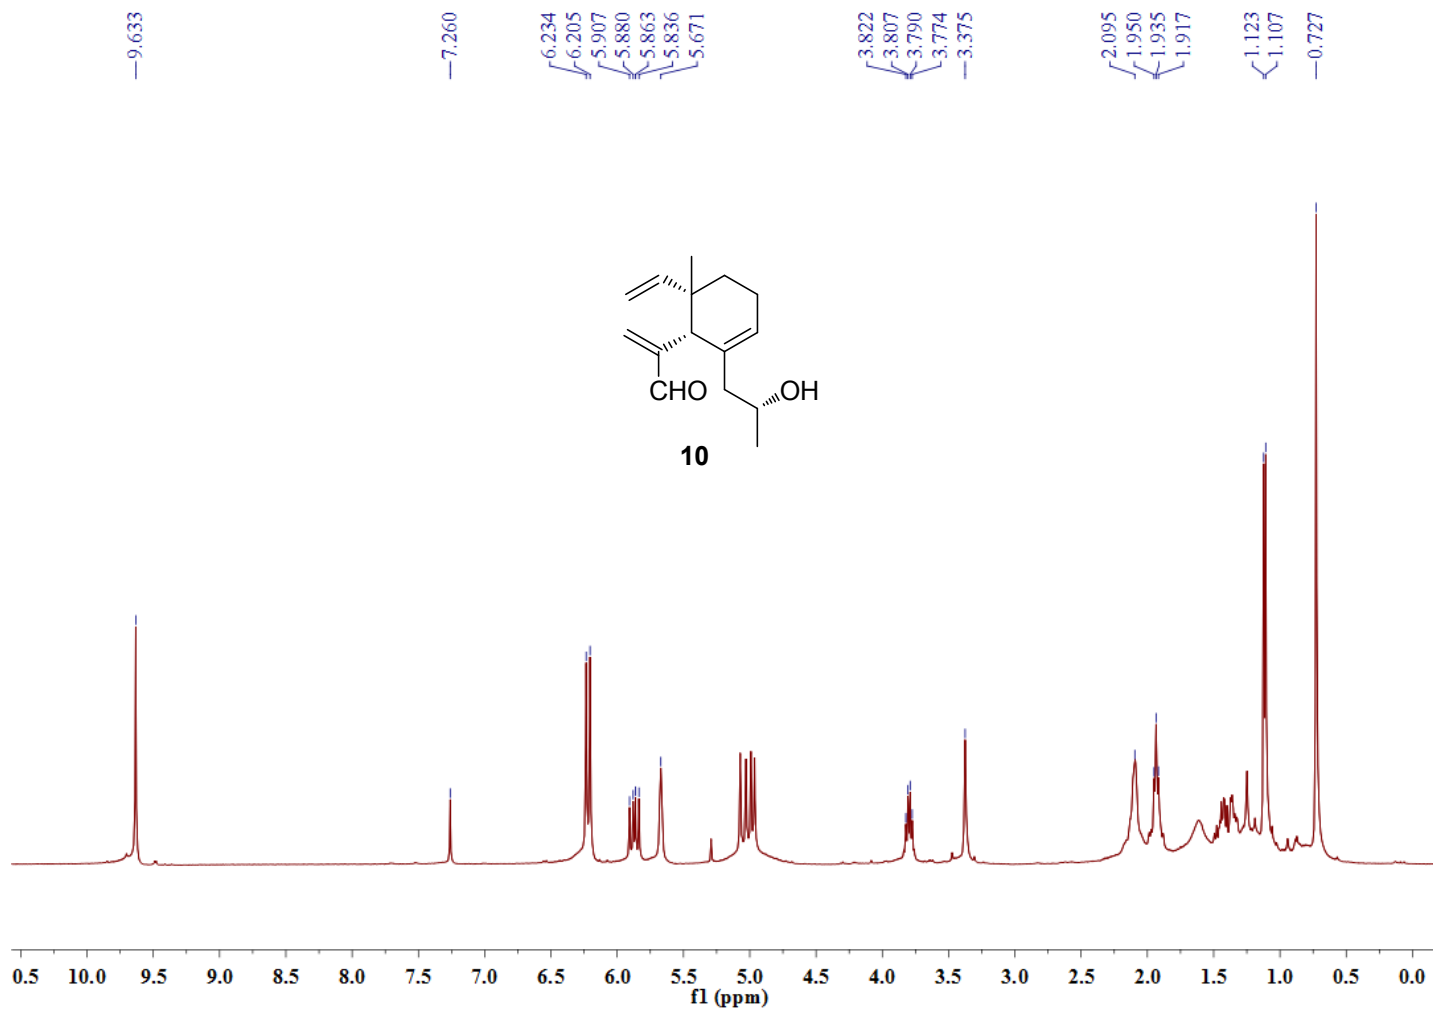



S46  $^1\text{H}$  NMR Spectrum of **11** in  $\text{CDCl}_3$

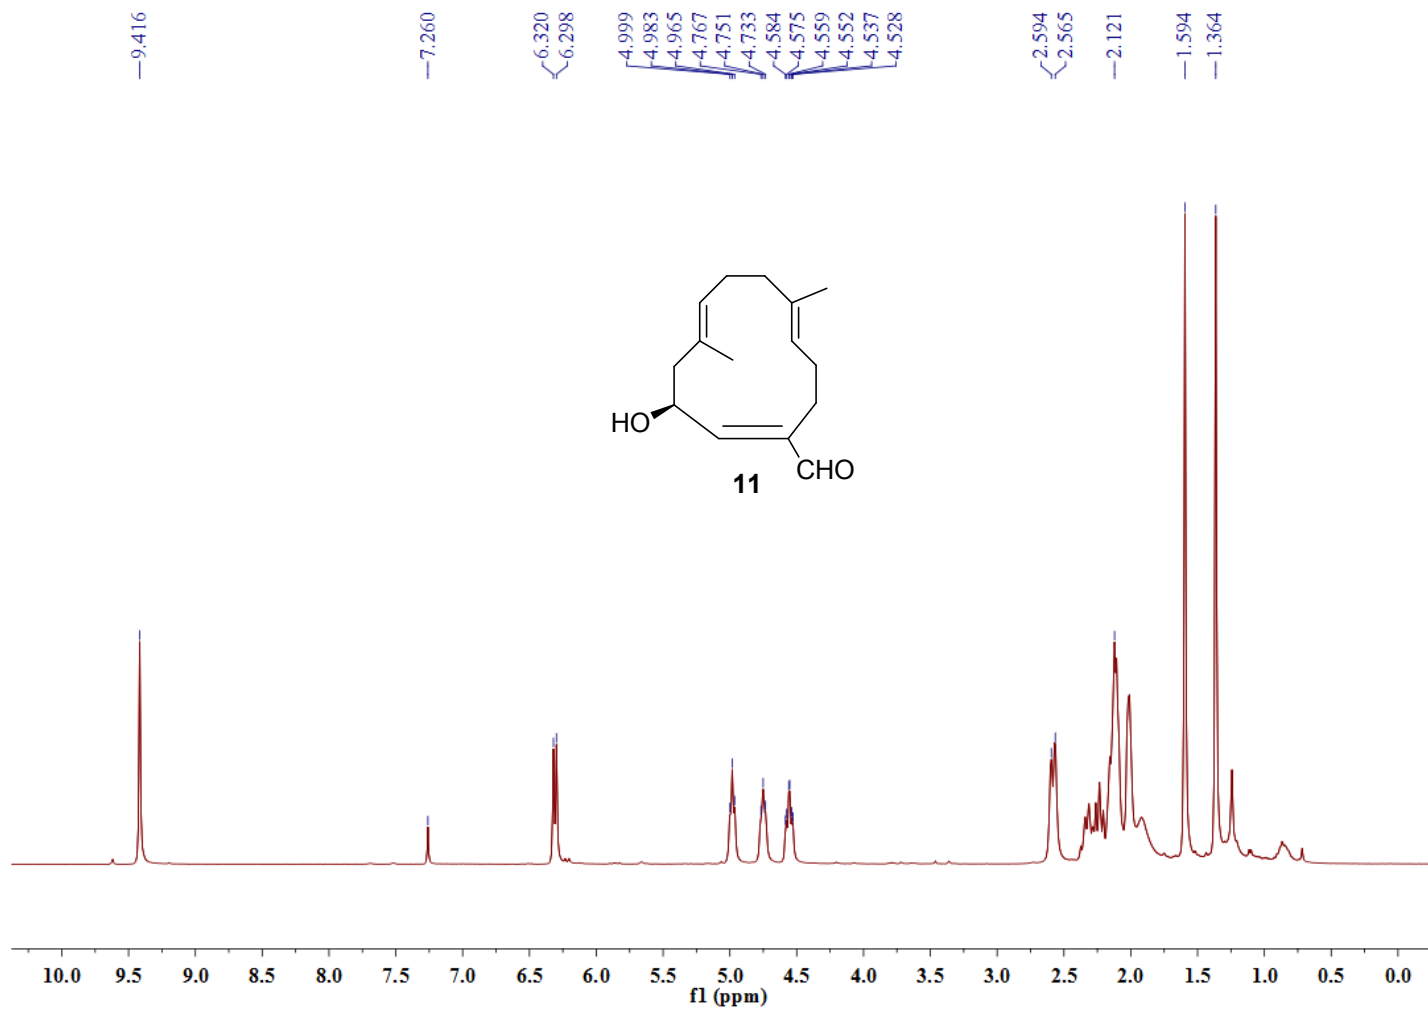

S47  $^1\text{H}$  NMR Spectrum of **12** in  $\text{CDCl}_3$

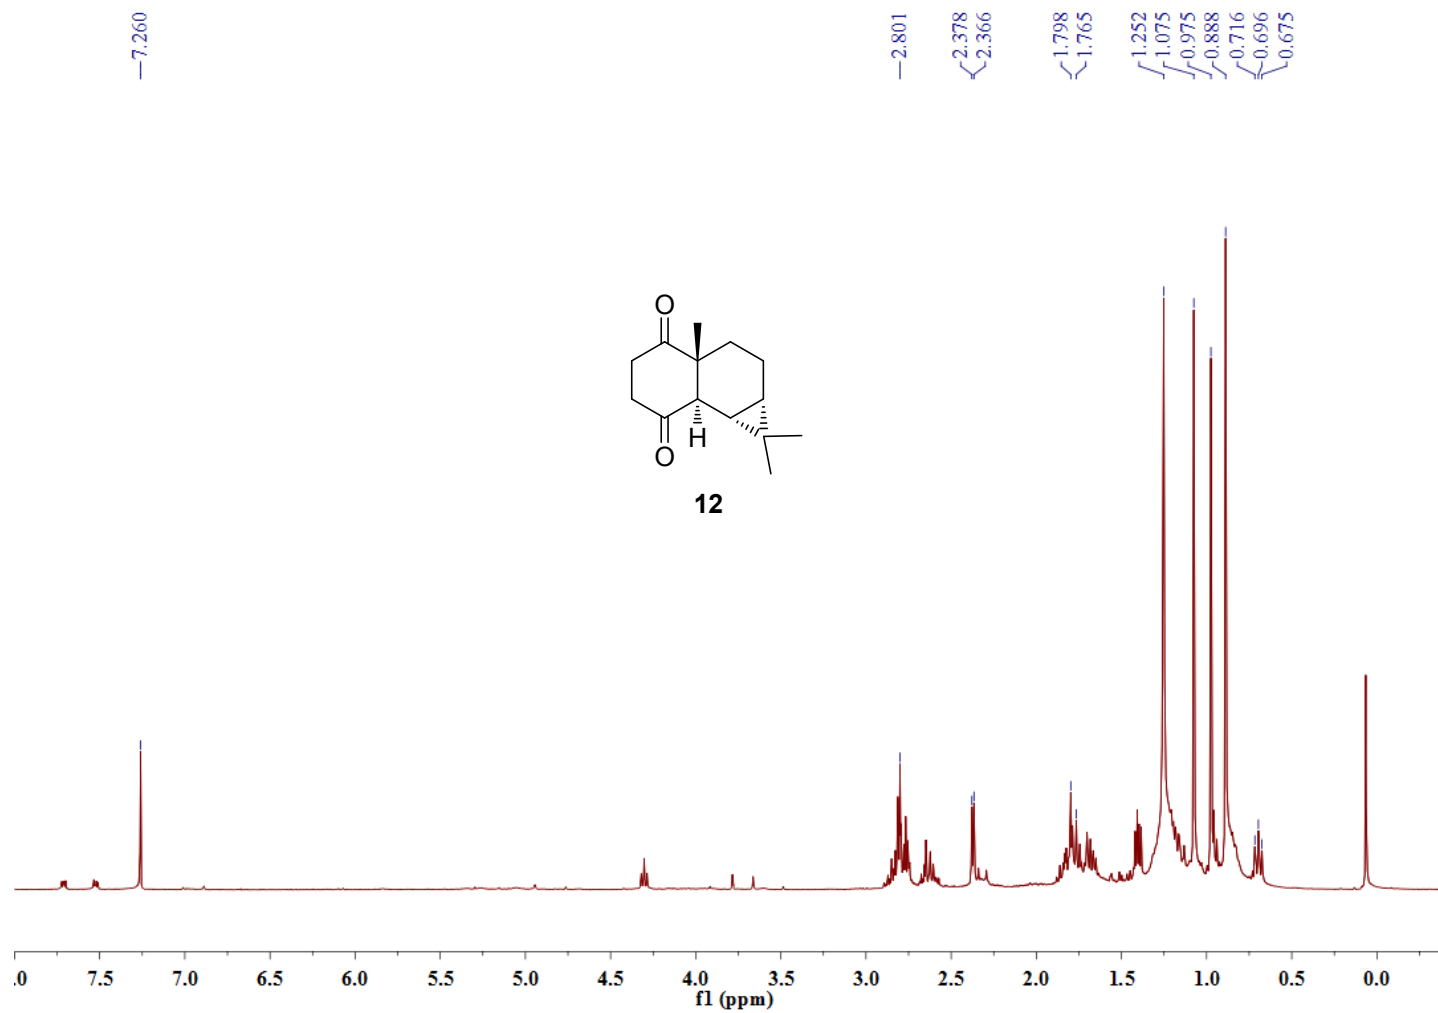

S48  $^1\text{H}$  NMR Spectrum of **13** in  $\text{CDCl}_3$

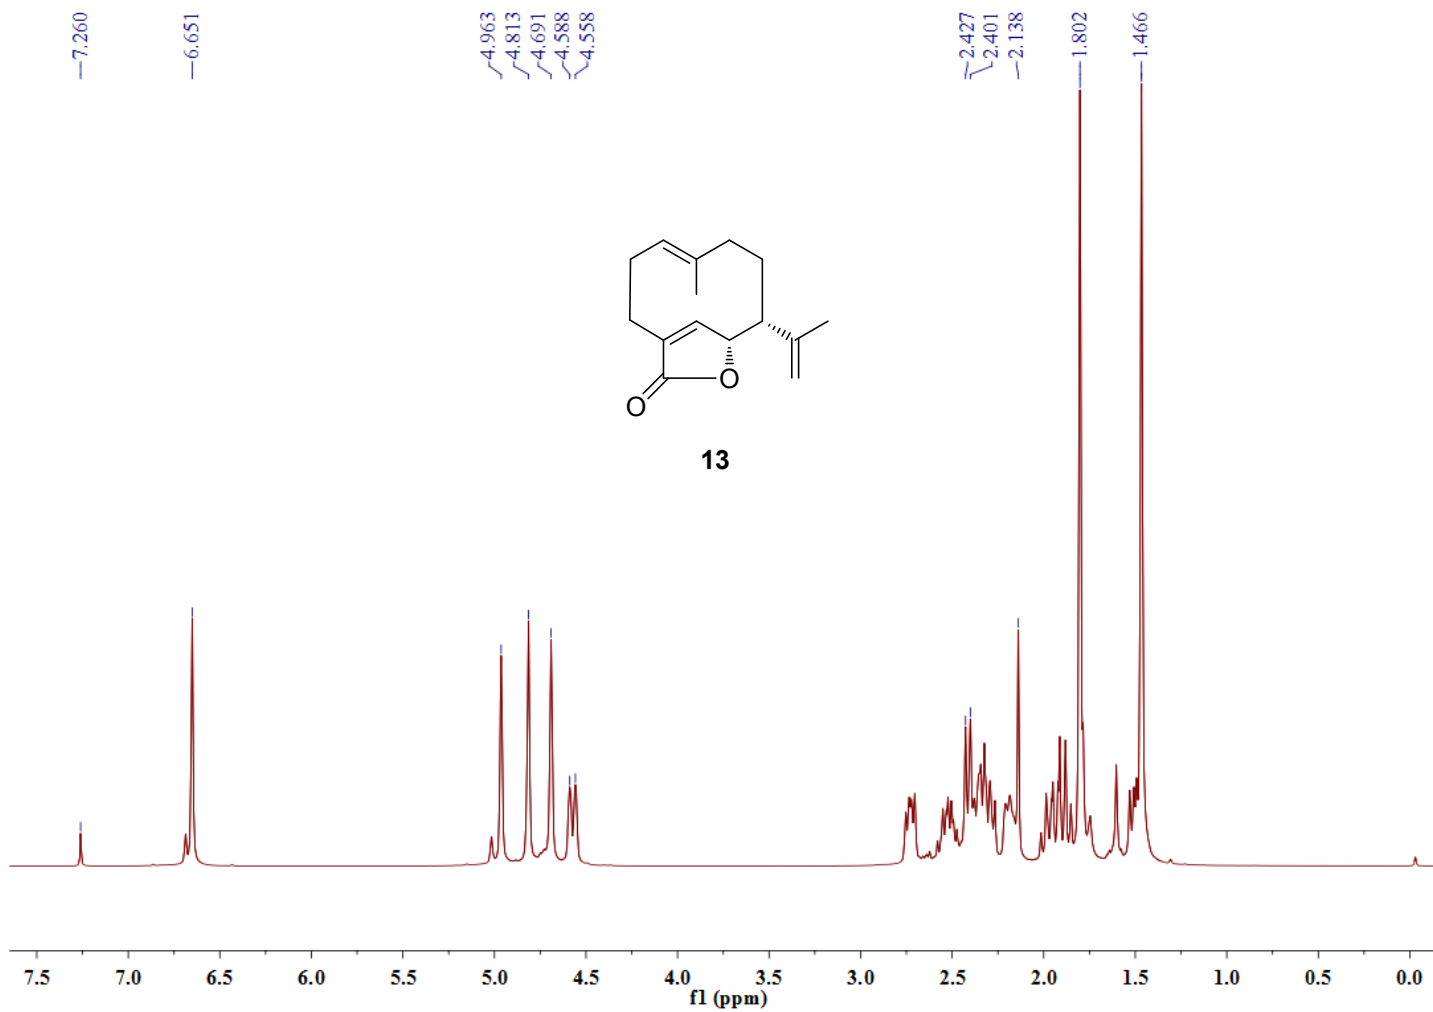

S49 <sup>1</sup>H NMR Spectrum of **14** in CDCl<sub>3</sub>

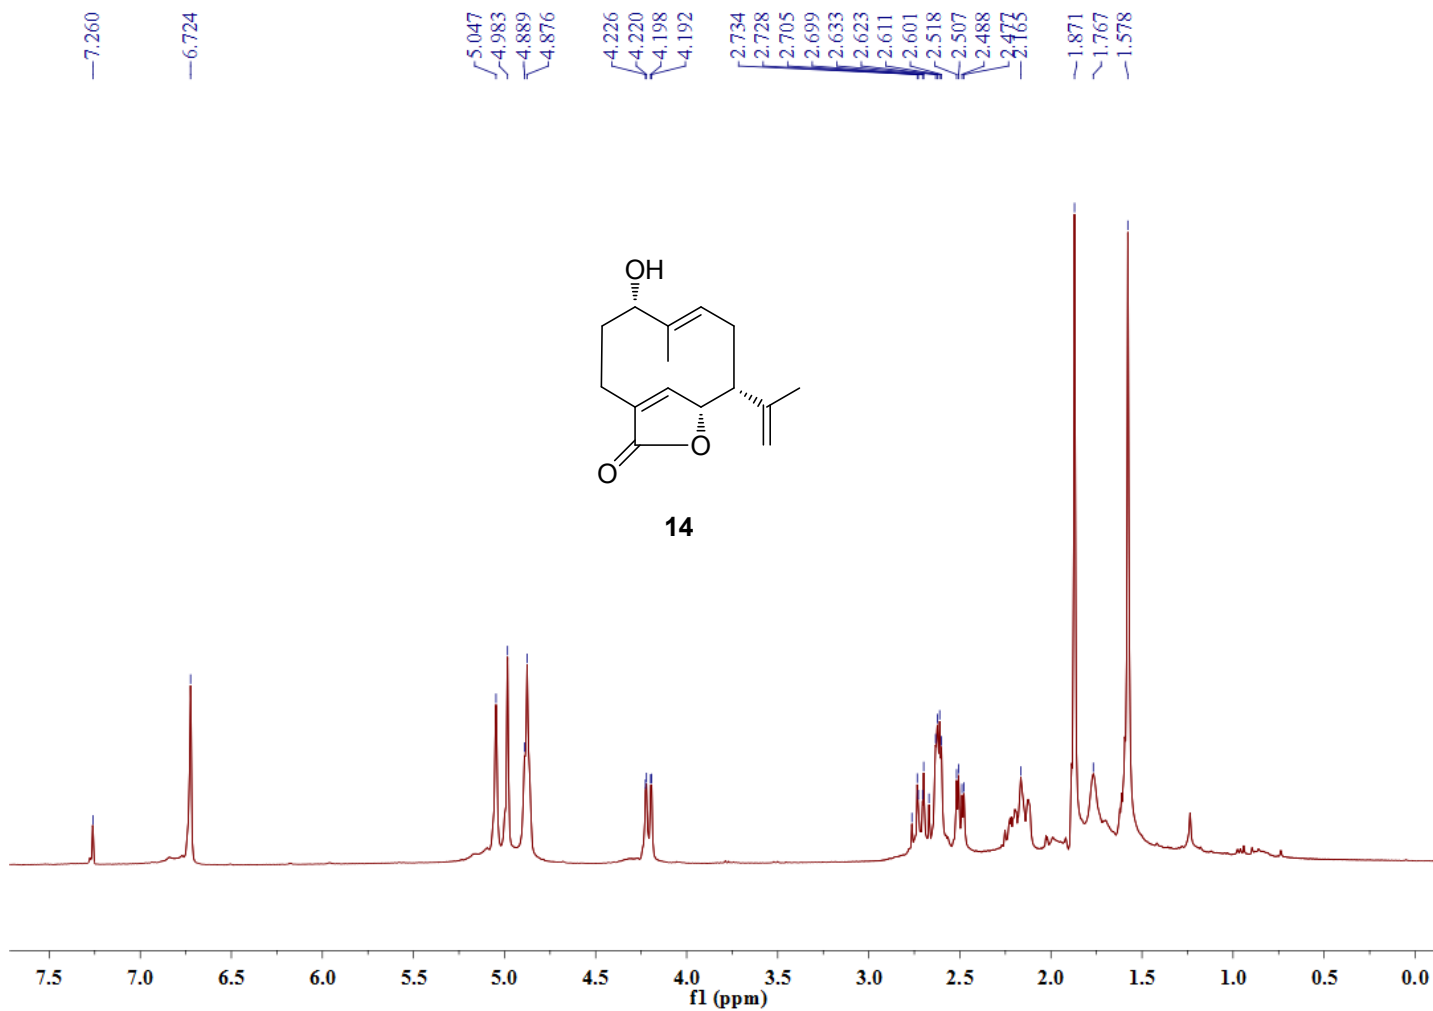

S50 <sup>1</sup>H NMR Spectrum of **15** in CDCl<sub>3</sub>

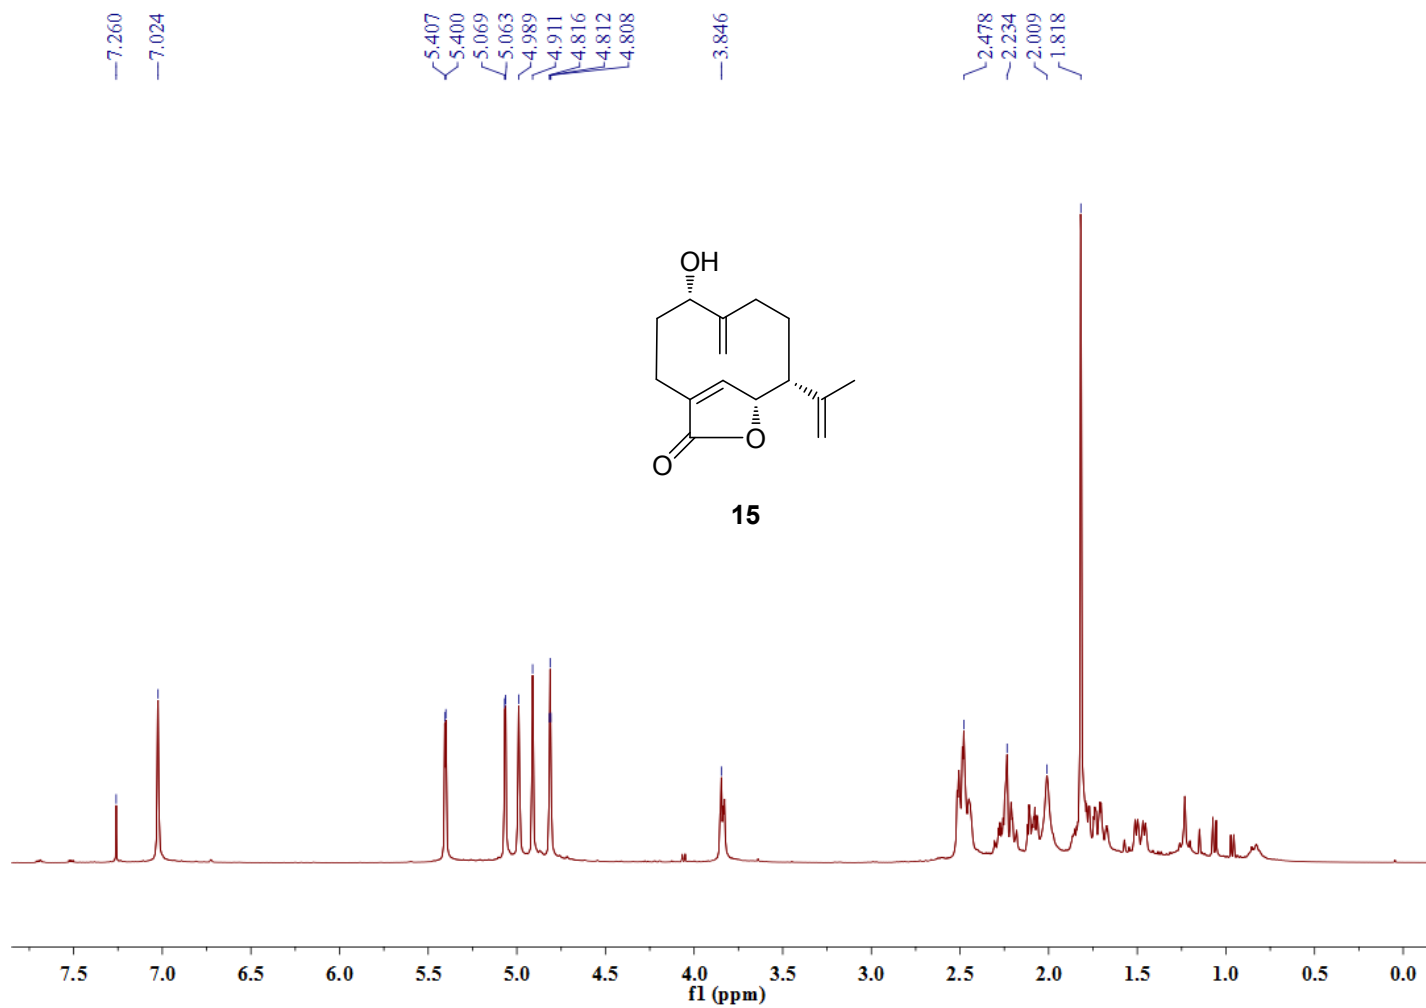

S51  $^1\text{H}$  NMR Spectrum of **16** in  $\text{CDCl}_3$

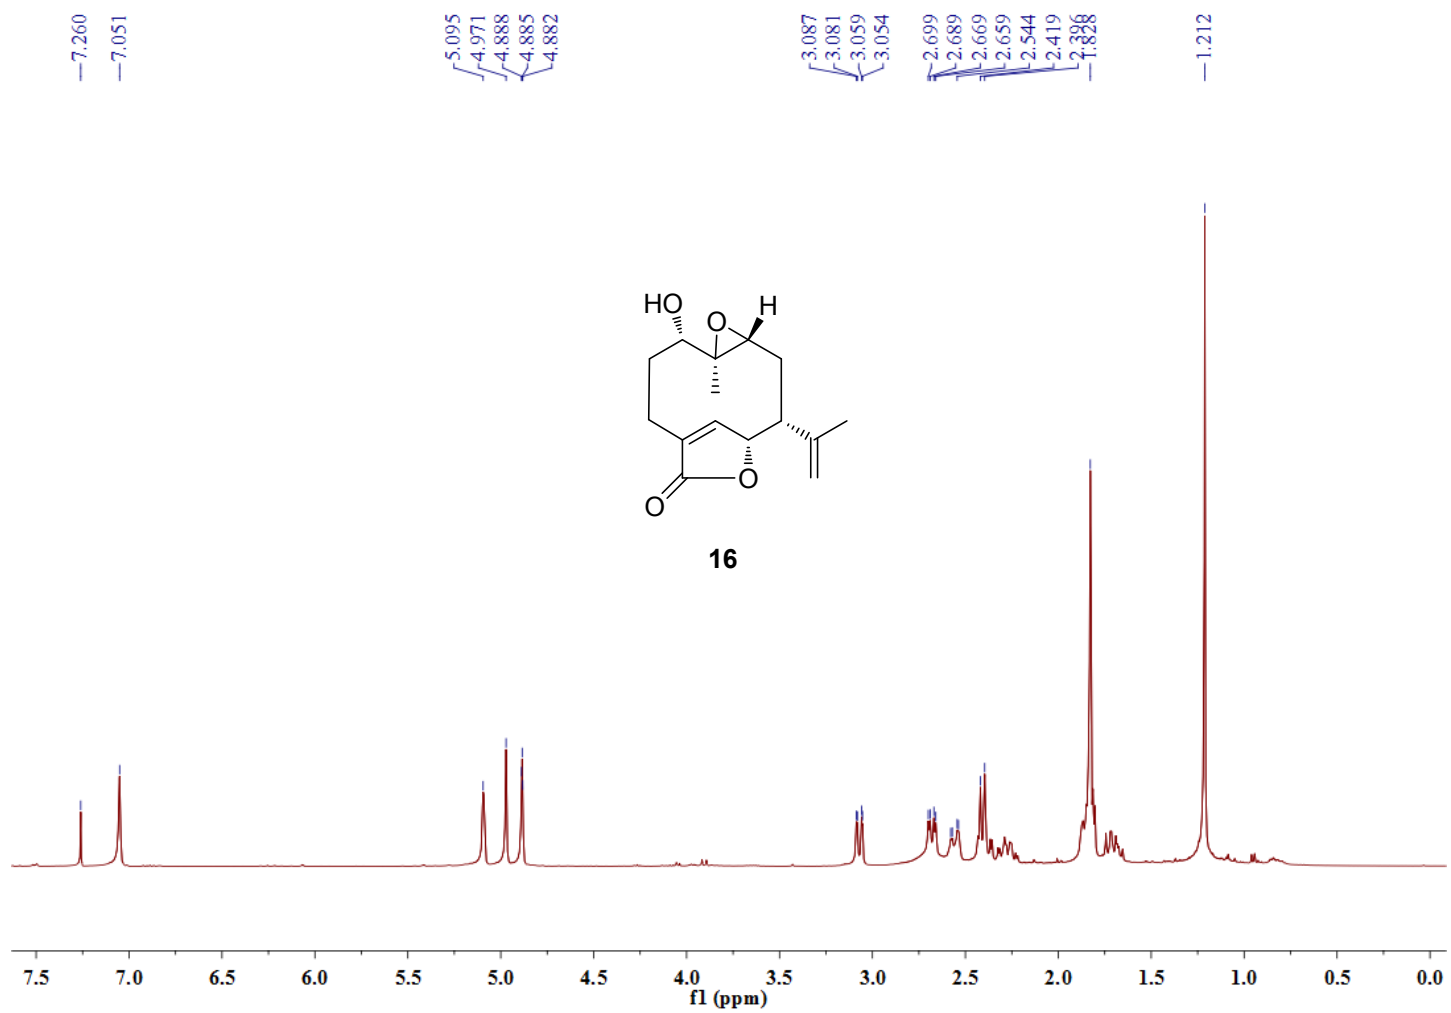

S52  $^1\text{H}$  NMR Spectrum of **17** in  $\text{CDCl}_3$

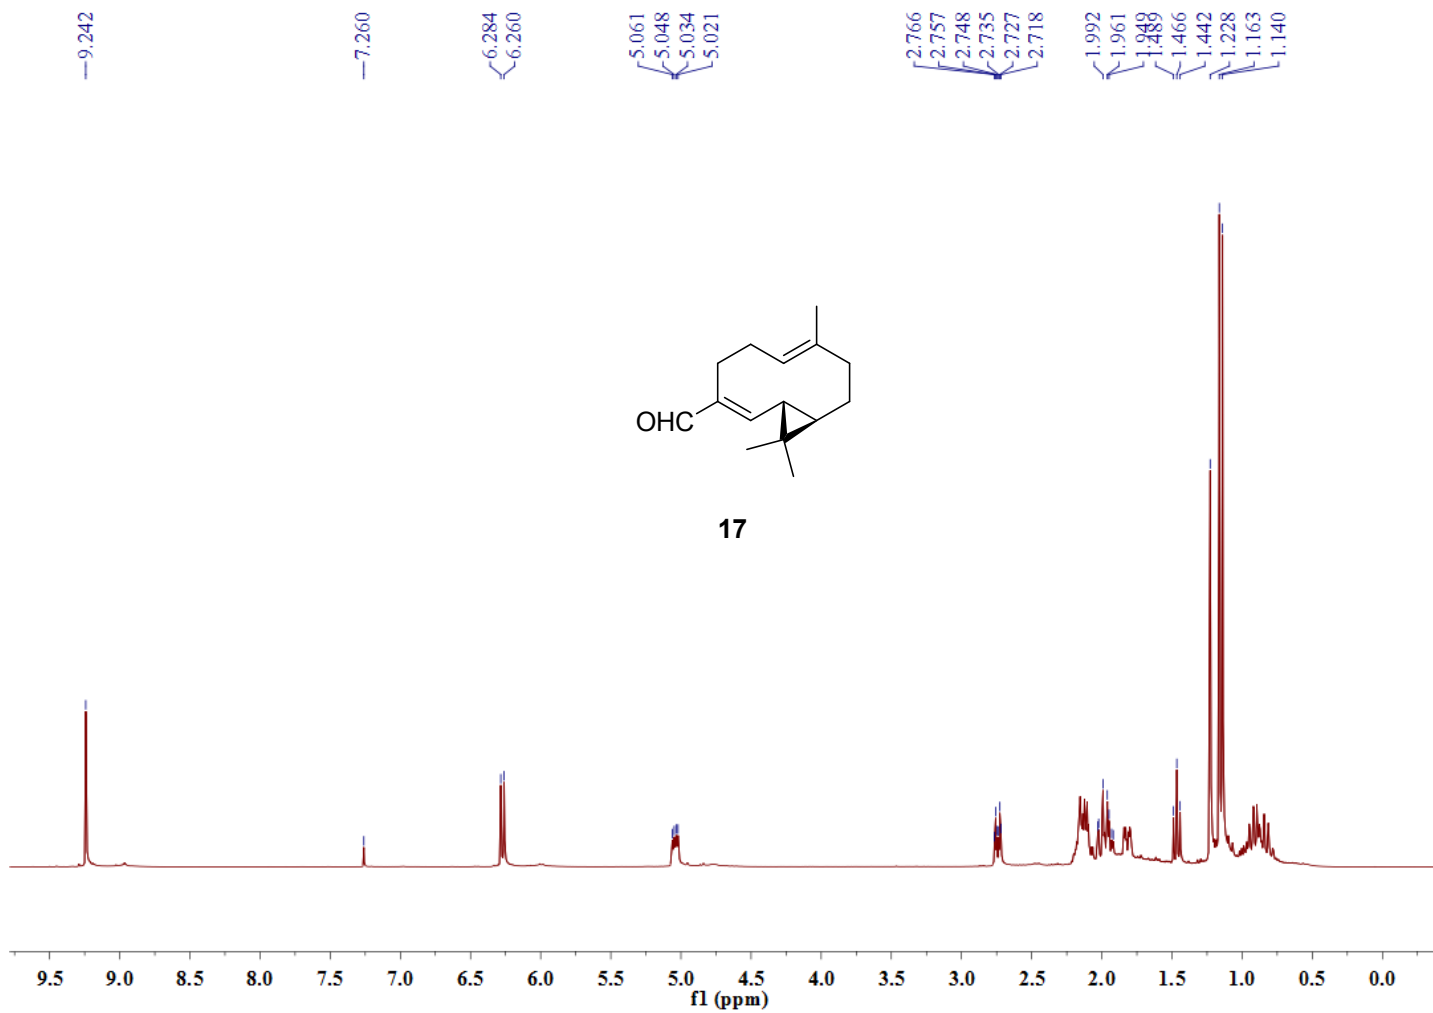

S53 <sup>1</sup>H NMR Spectrum of **18** in CDCl<sub>3</sub>

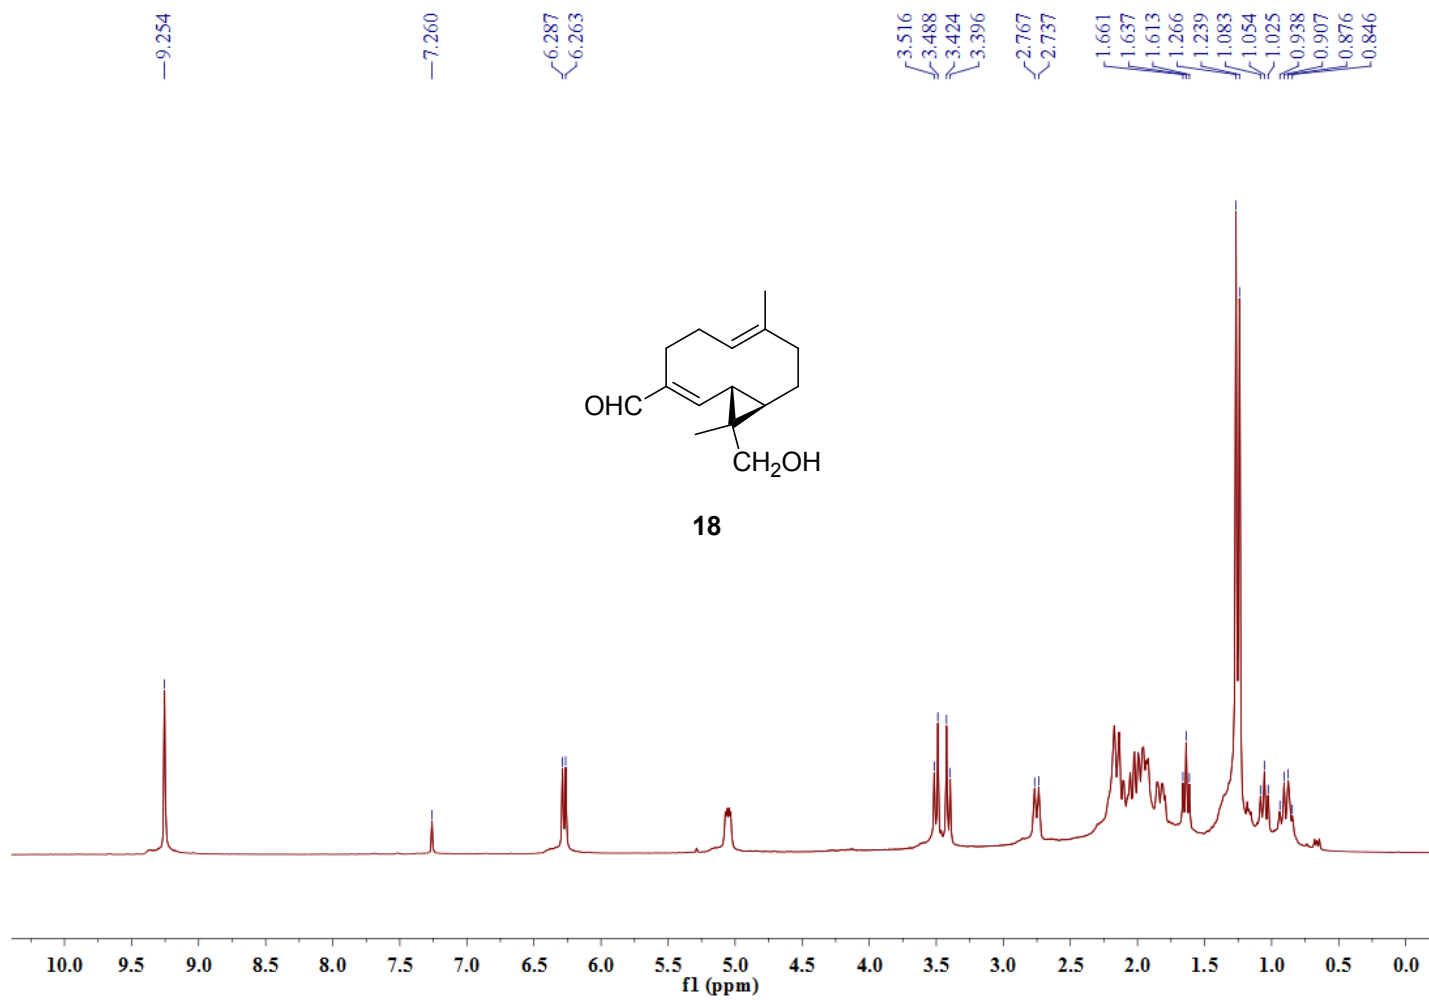



S54  $^1\text{H}$  NMR Spectrum of **19** in  $\text{CDCl}_3$

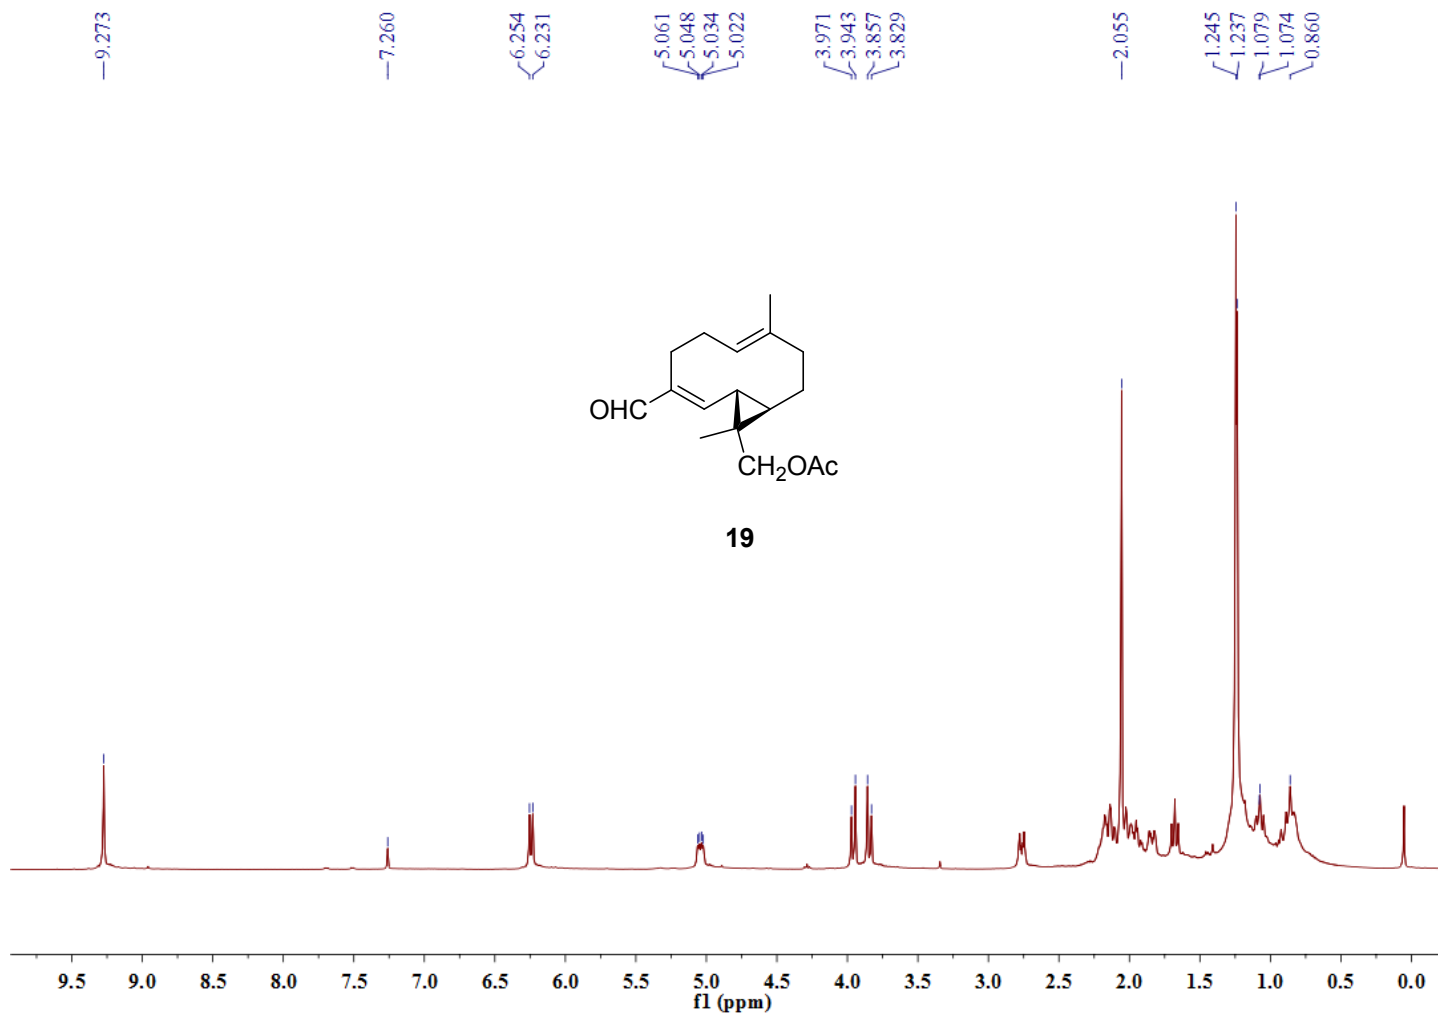

S55  $^1\text{H}$  NMR Spectrum of **20** in  $\text{CDCl}_3$

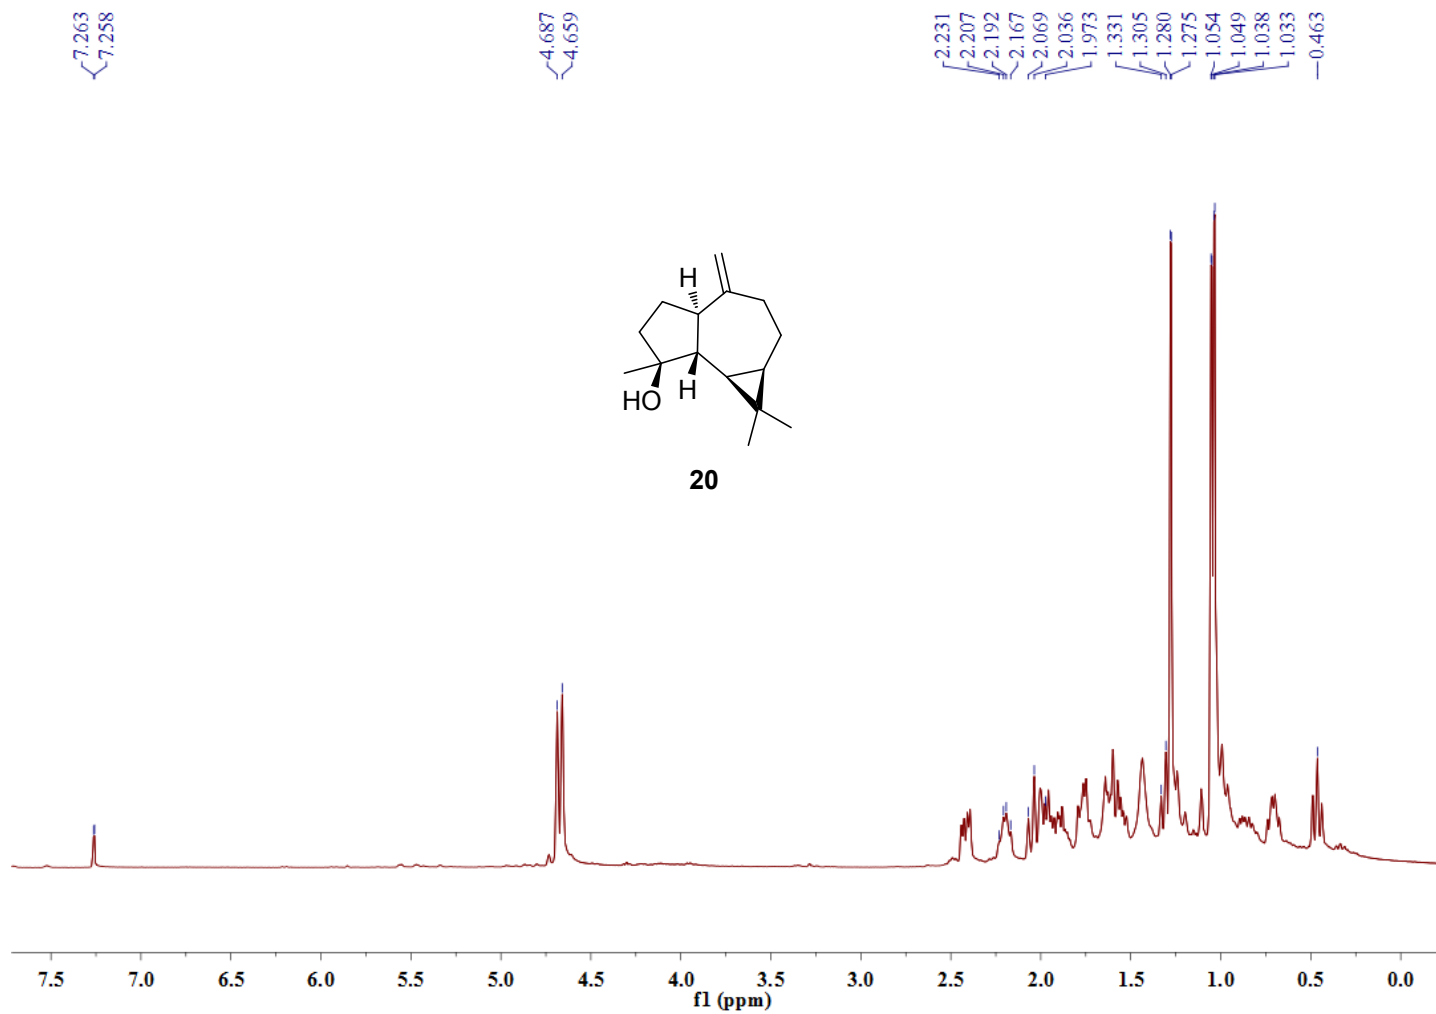

S56 <sup>1</sup>H NMR Spectrum of **21** in CDCl<sub>3</sub>

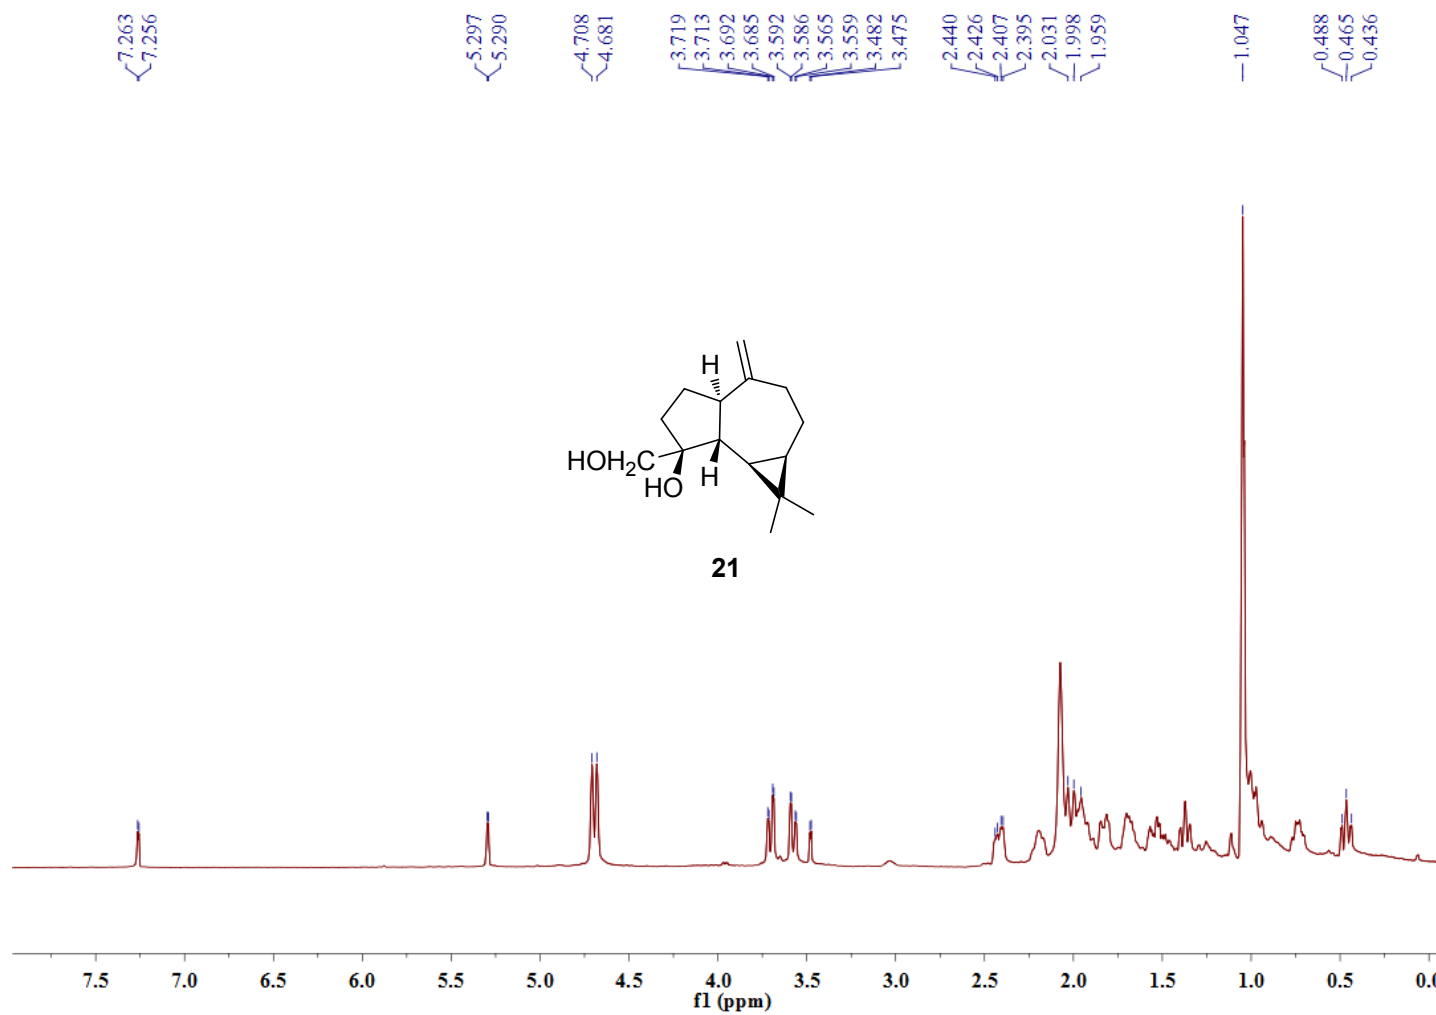

S57 <sup>1</sup>H NMR Spectrum of **22** in CDCl<sub>3</sub>

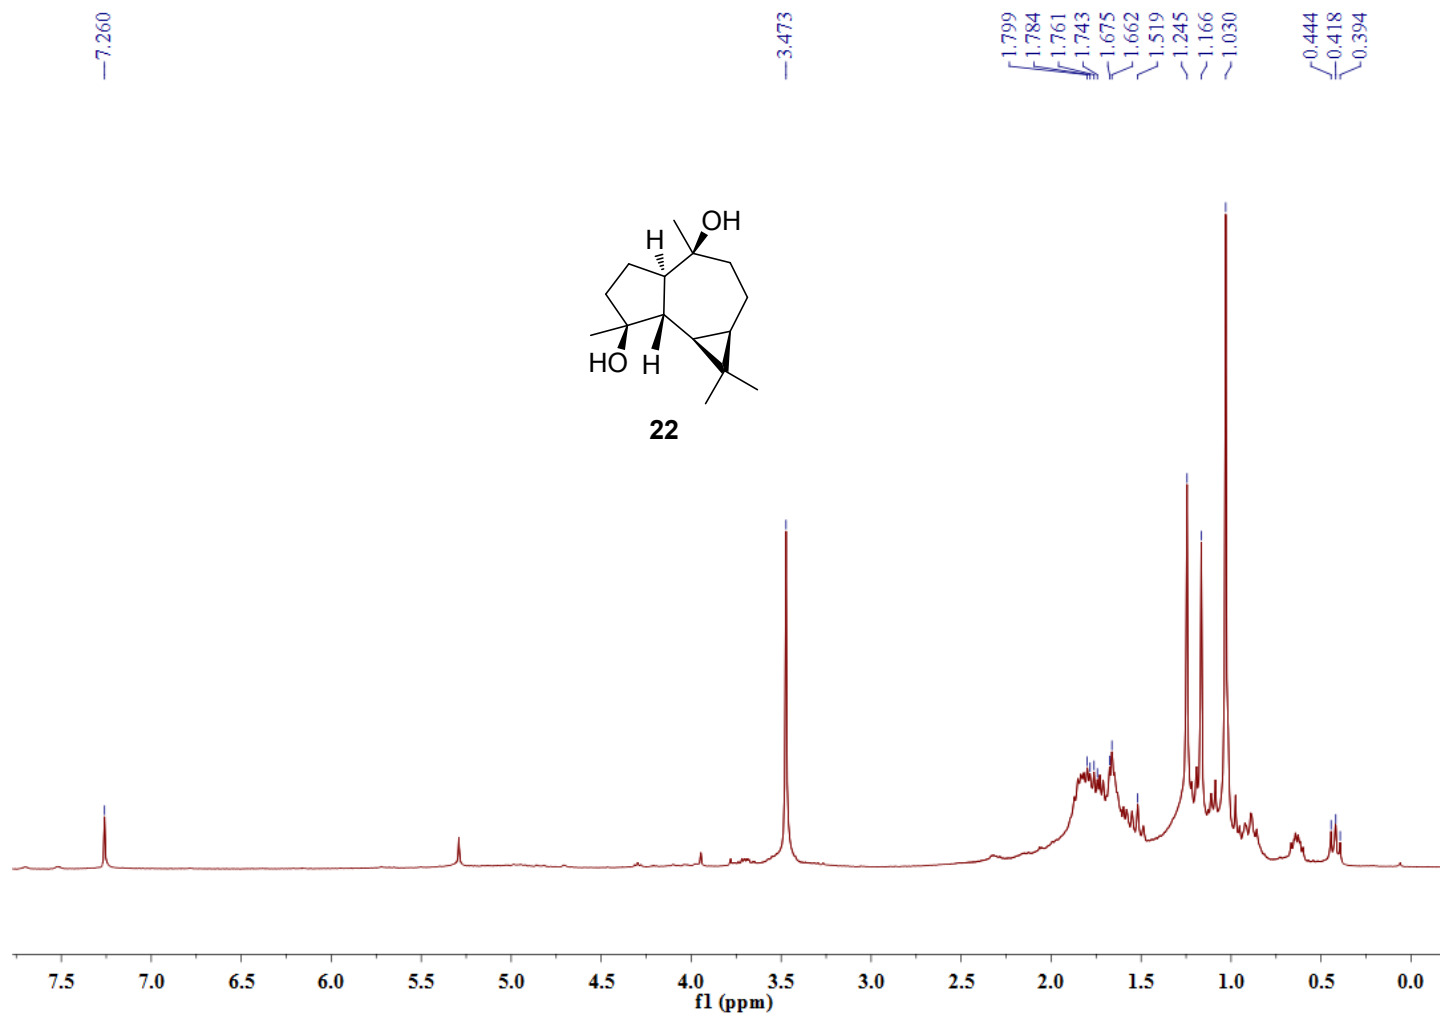

S58  $^1\text{H}$  NMR Spectrum of **23** in  $\text{CDCl}_3$

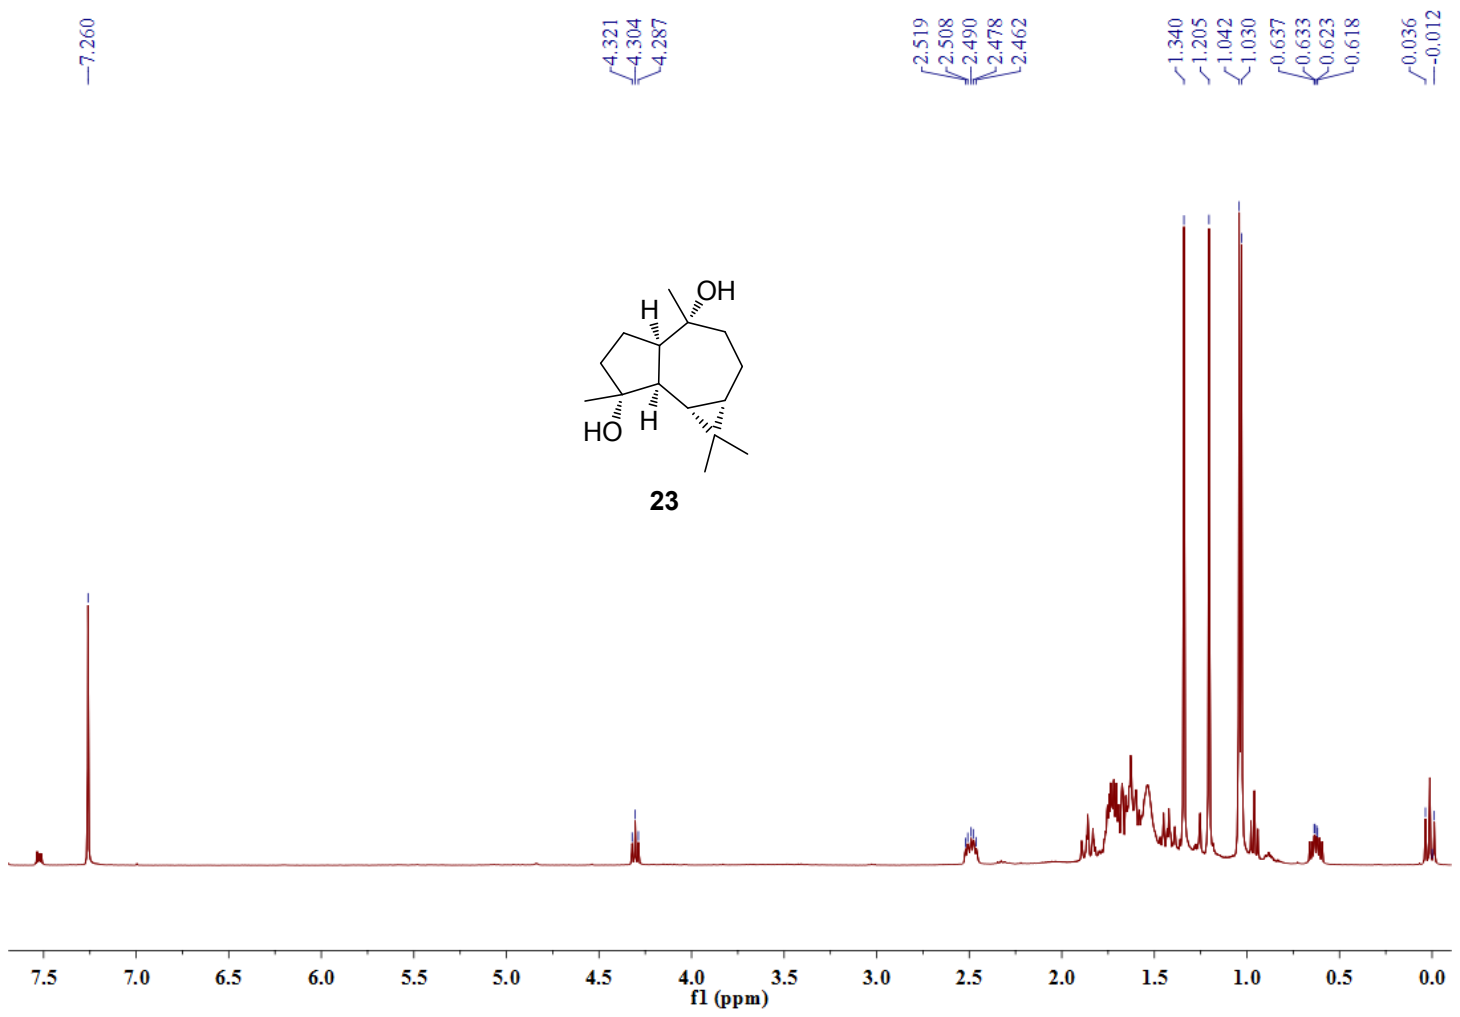

S59  $^1\text{H}$  NMR Spectrum of **24** in  $\text{CDCl}_3$

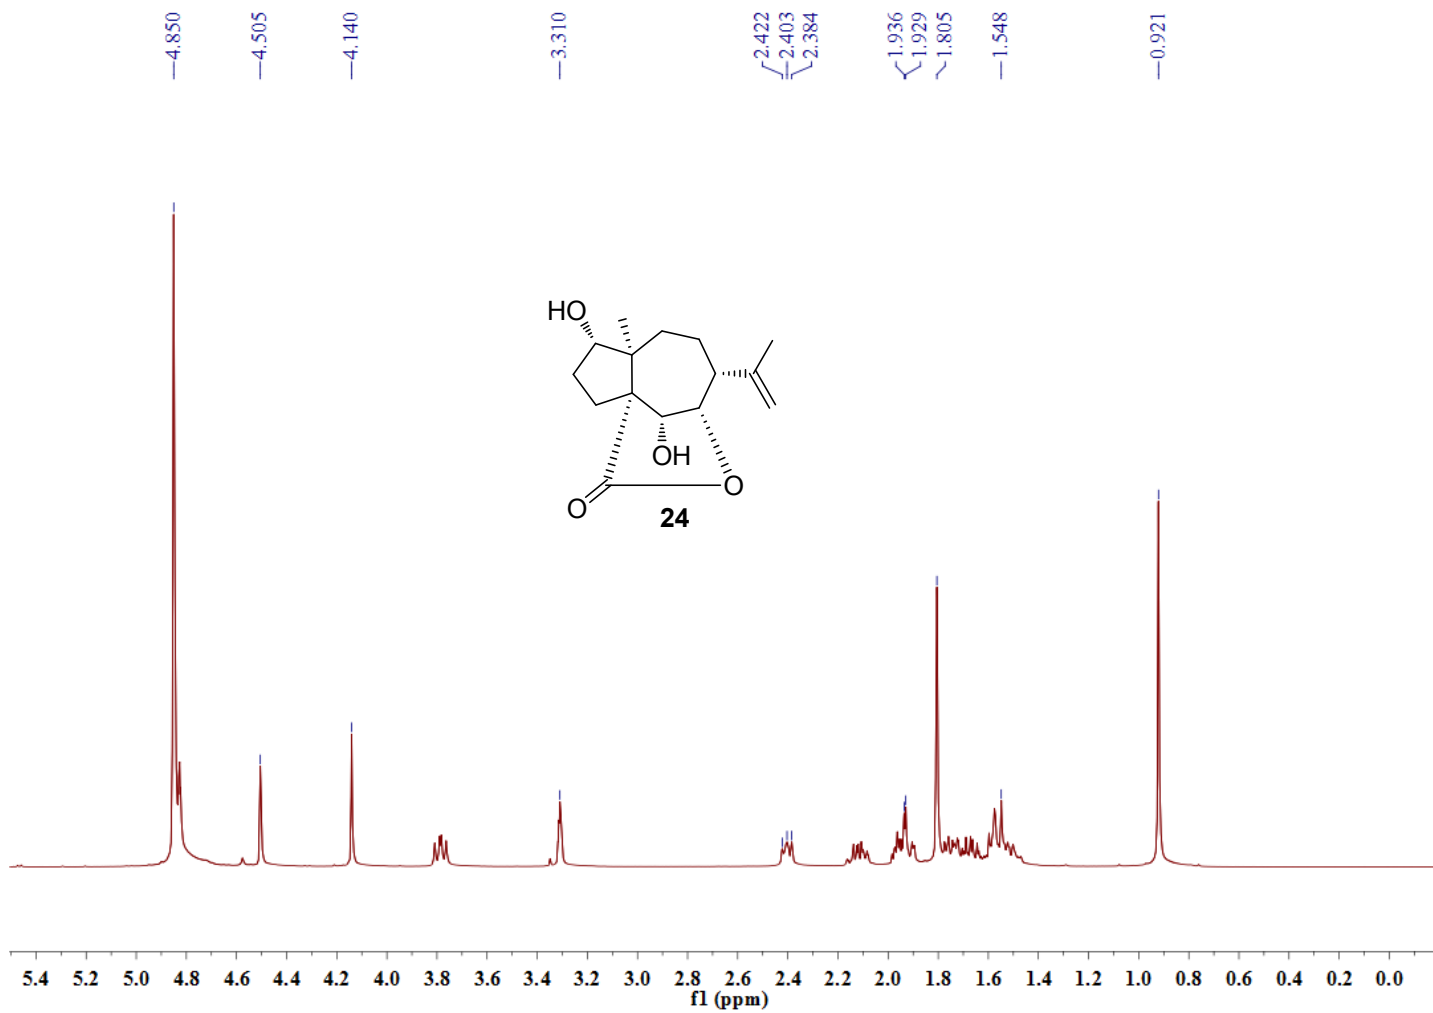

S60  $^1\text{H}$  NMR Spectrum of **25** in  $\text{CDCl}_3$

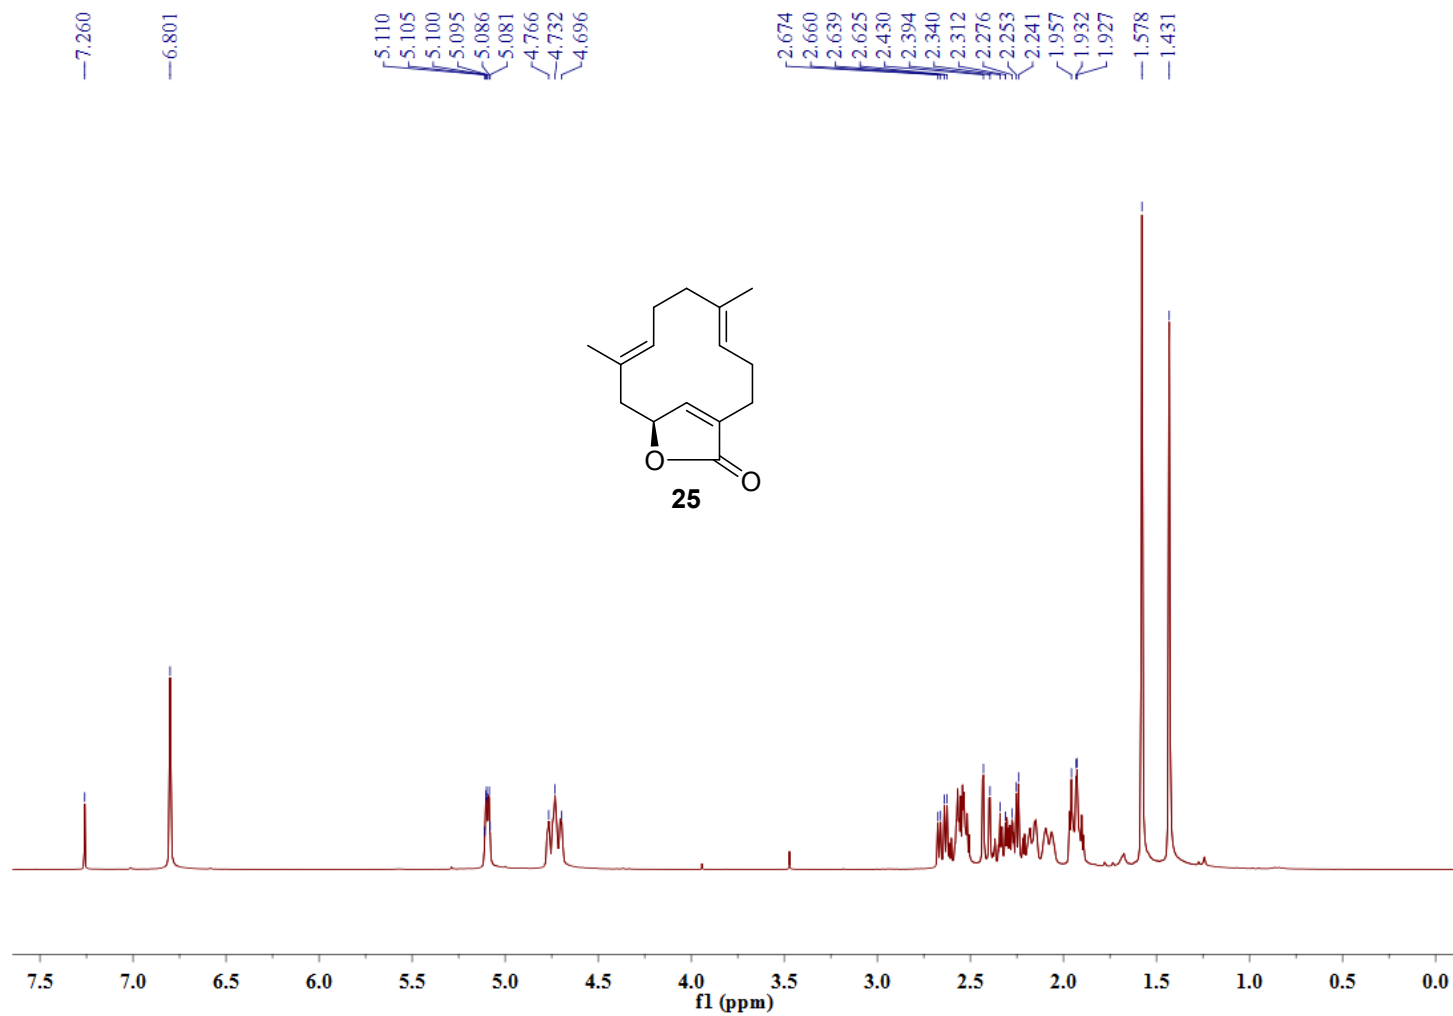

S61 <sup>1</sup>H NMR Spectrum of **26** in CDCl<sub>3</sub>

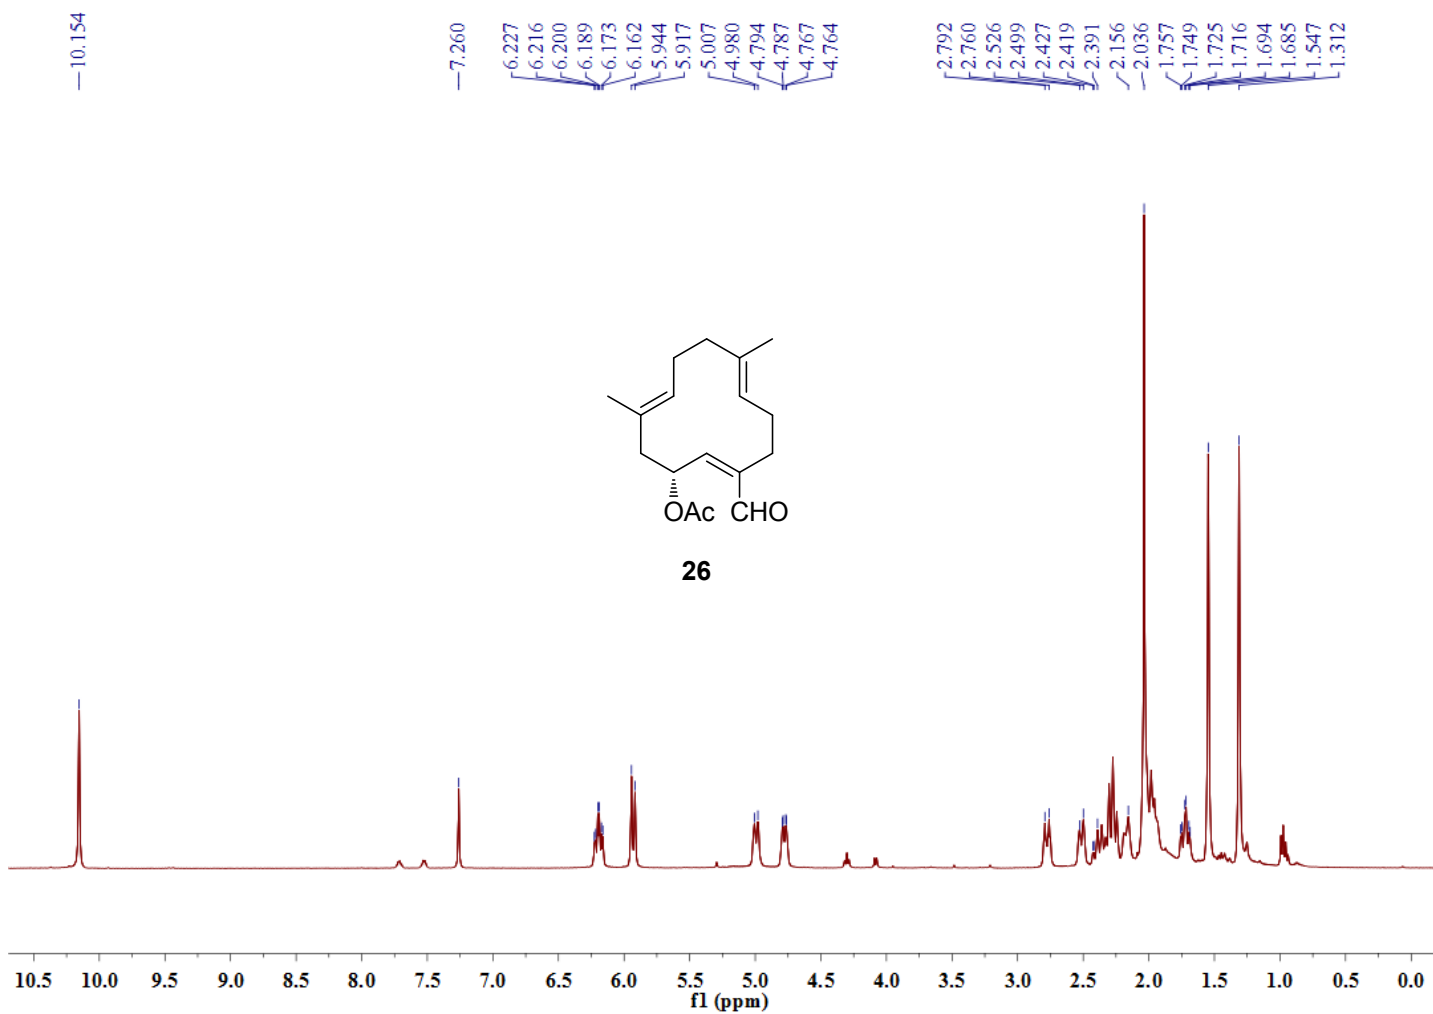



S62  $^1\text{H}$  NMR Spectrum of **27** in  $\text{CDCl}_3$

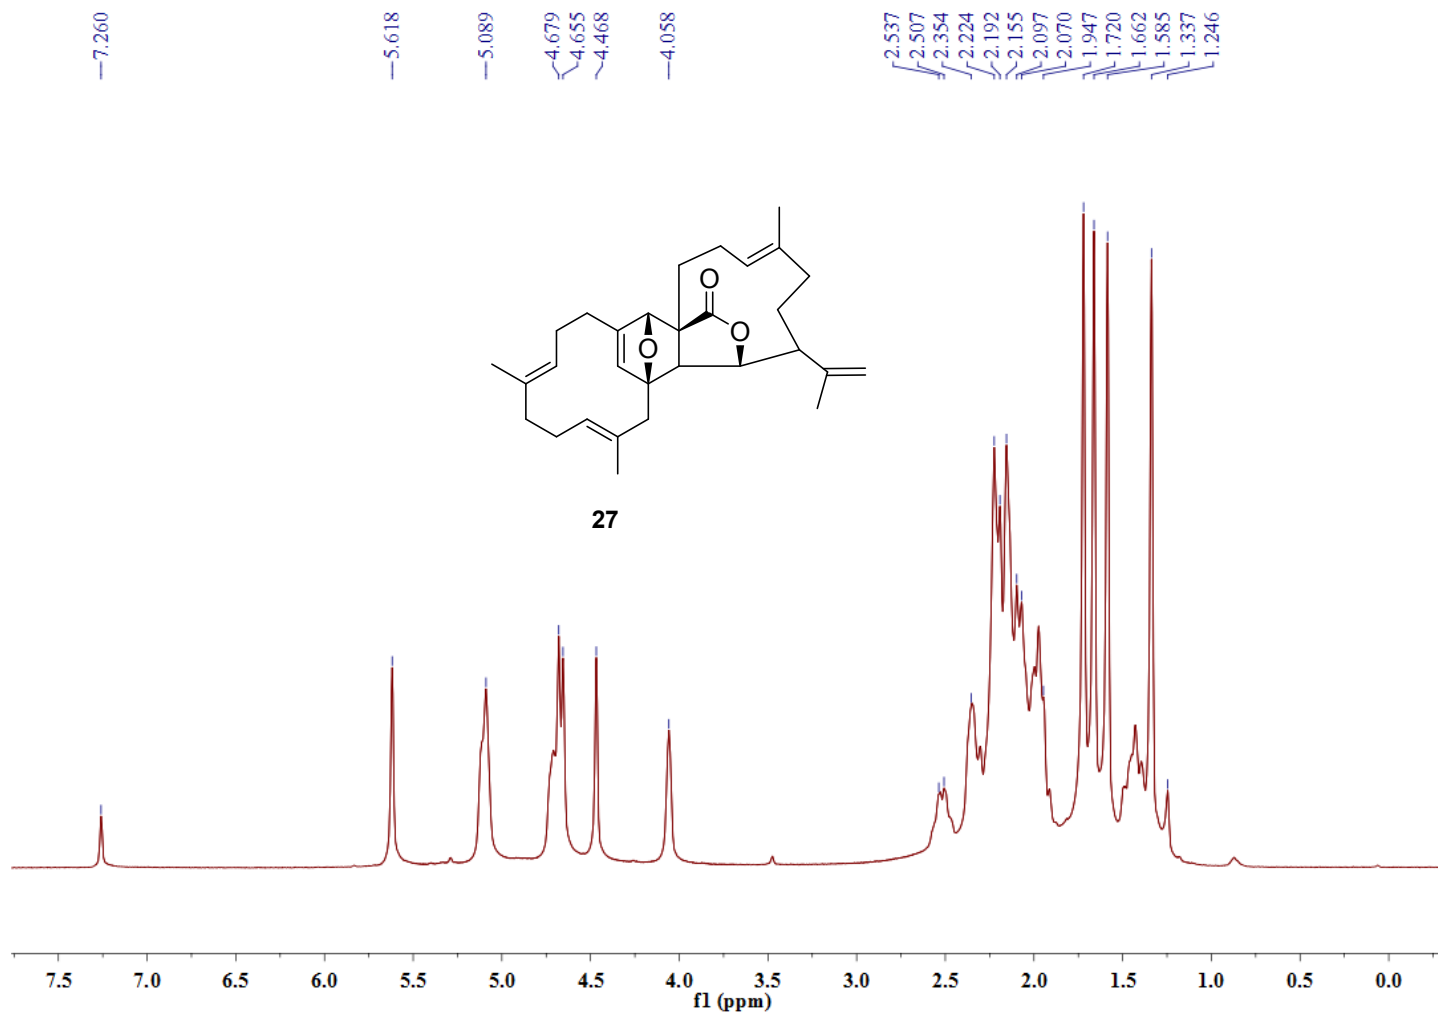

S63 <sup>1</sup>H NMR Spectrum of **28** in CDCl<sub>3</sub>

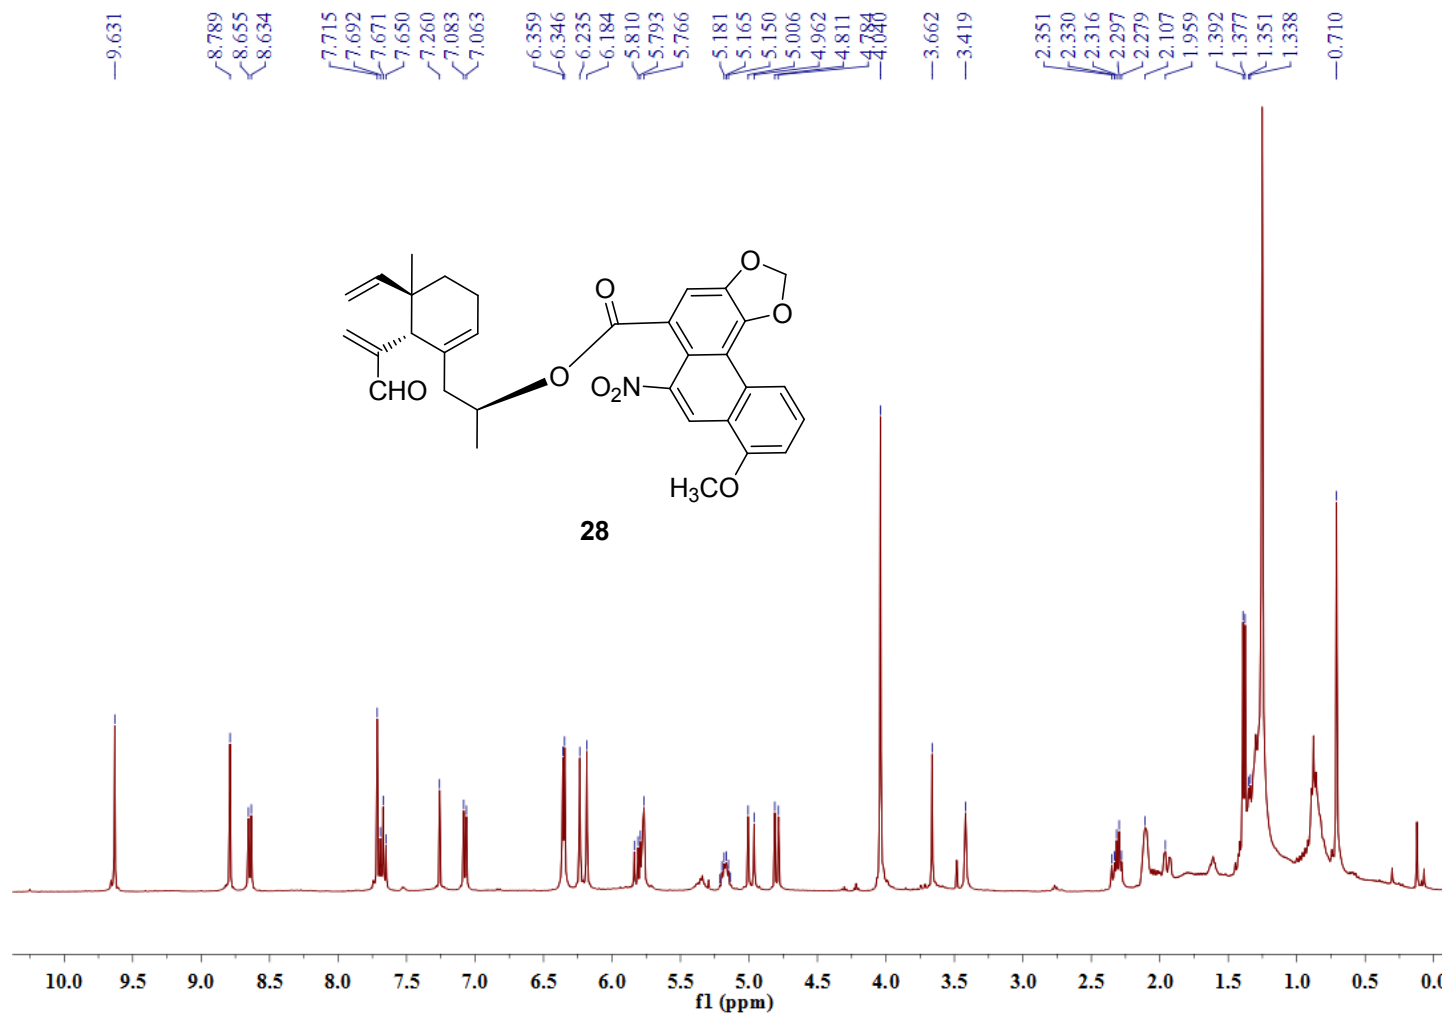

S64 <sup>1</sup>H NMR Spectrum of **29** in CDCl<sub>3</sub>

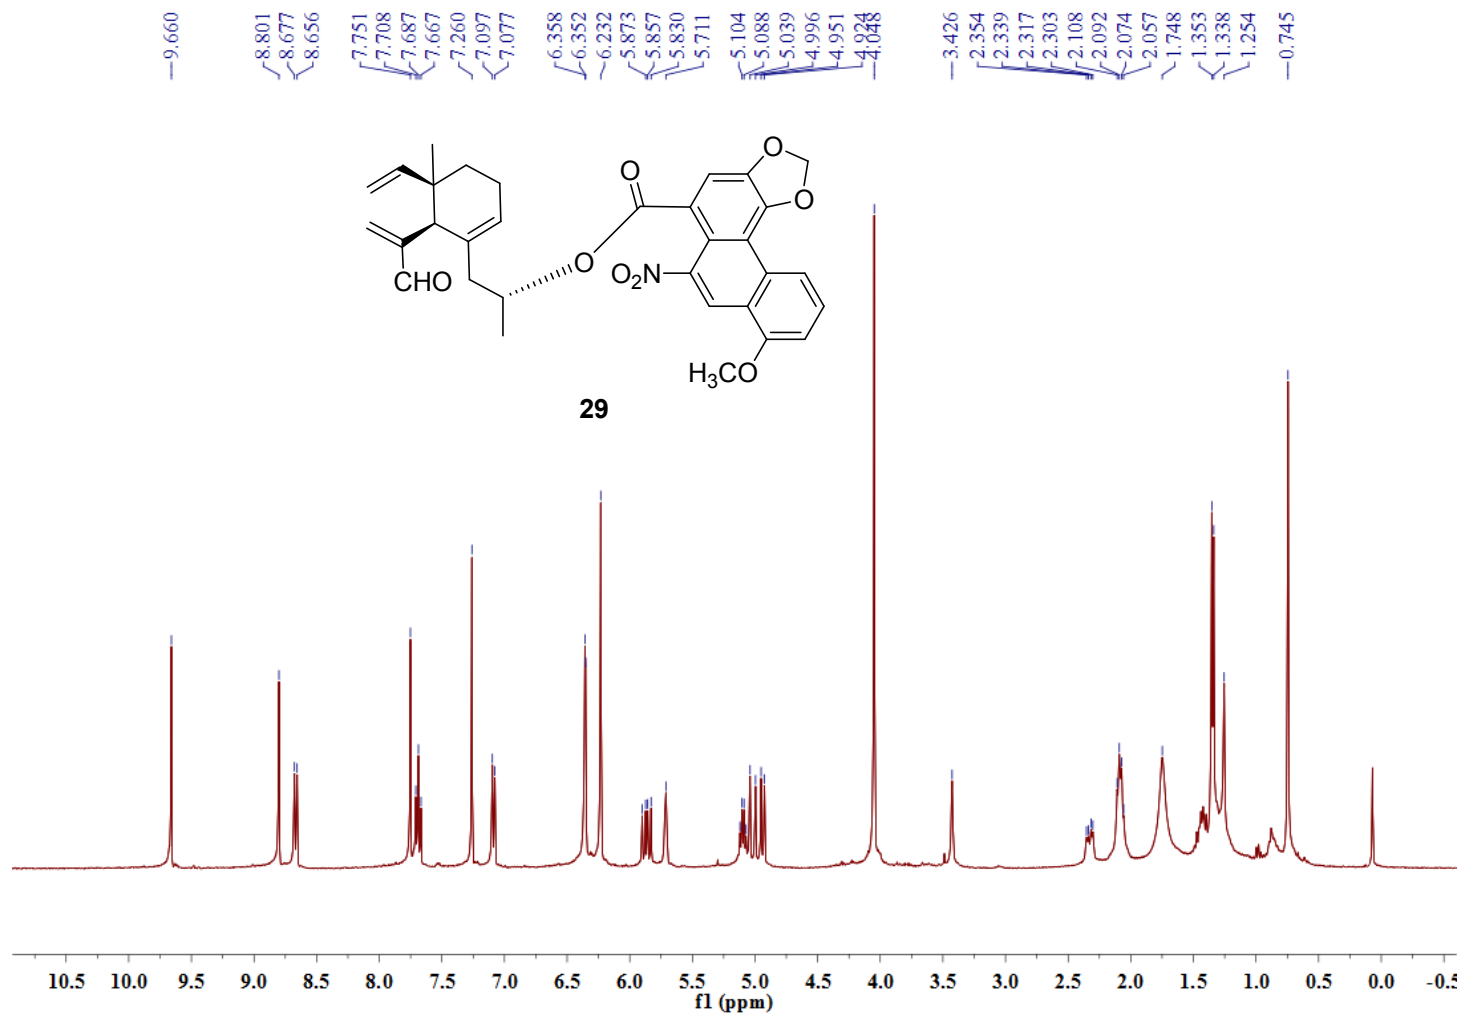

S65 <sup>1</sup>H NMR Spectrum of **30** in CDCl<sub>3</sub>

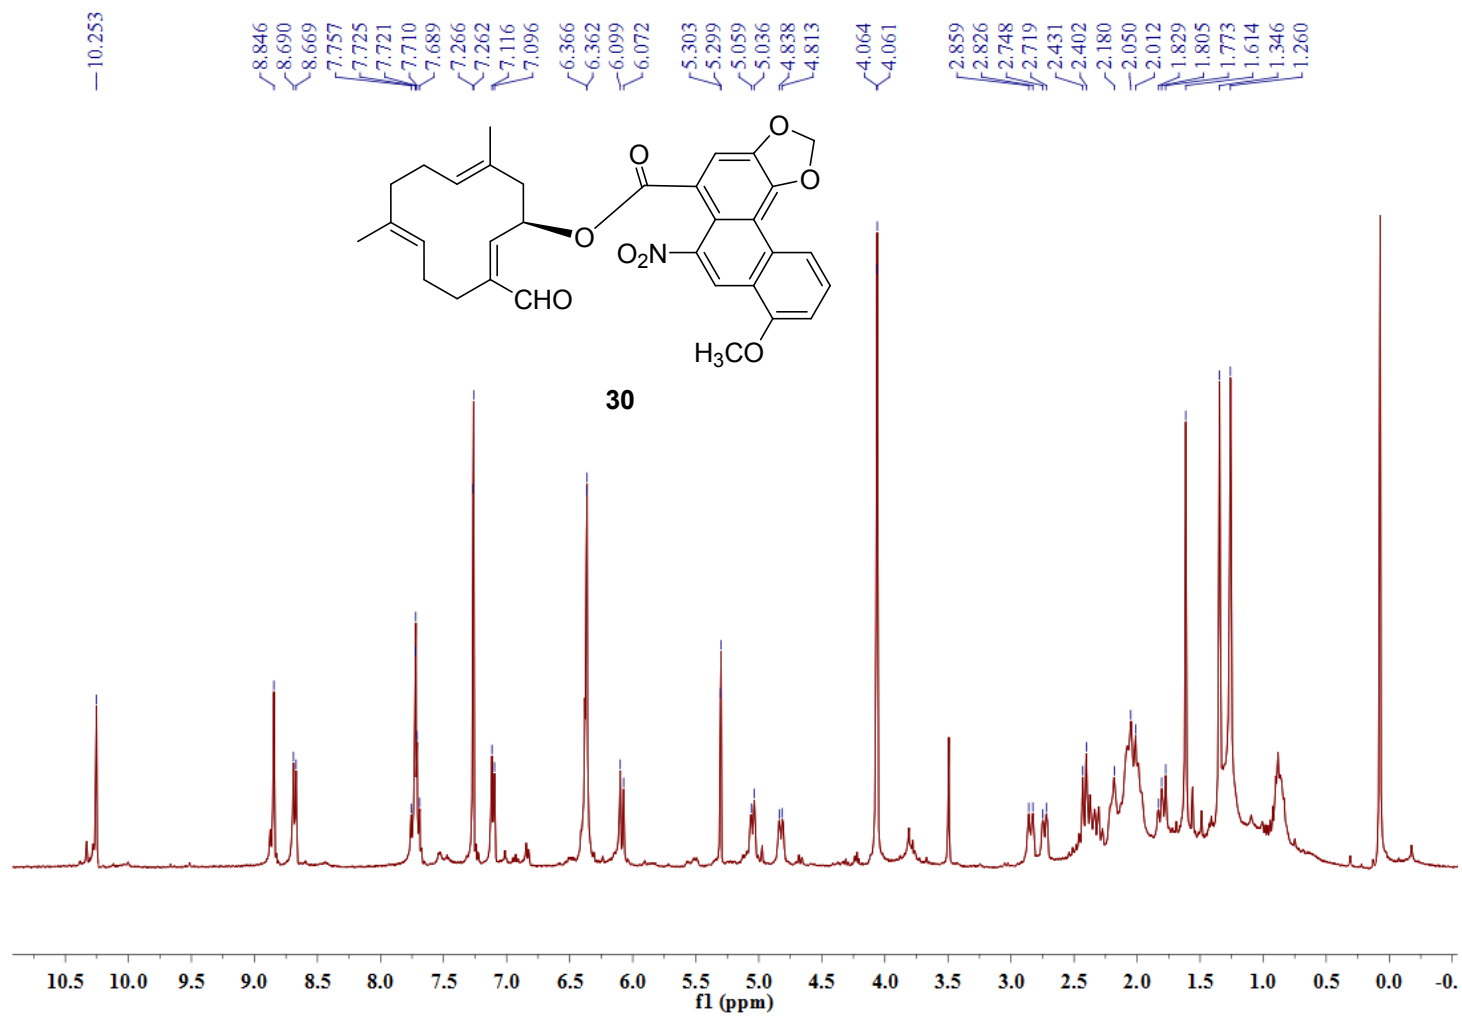

S66 Detail information for ECD calculation

***Lowest Energy Conformers:***

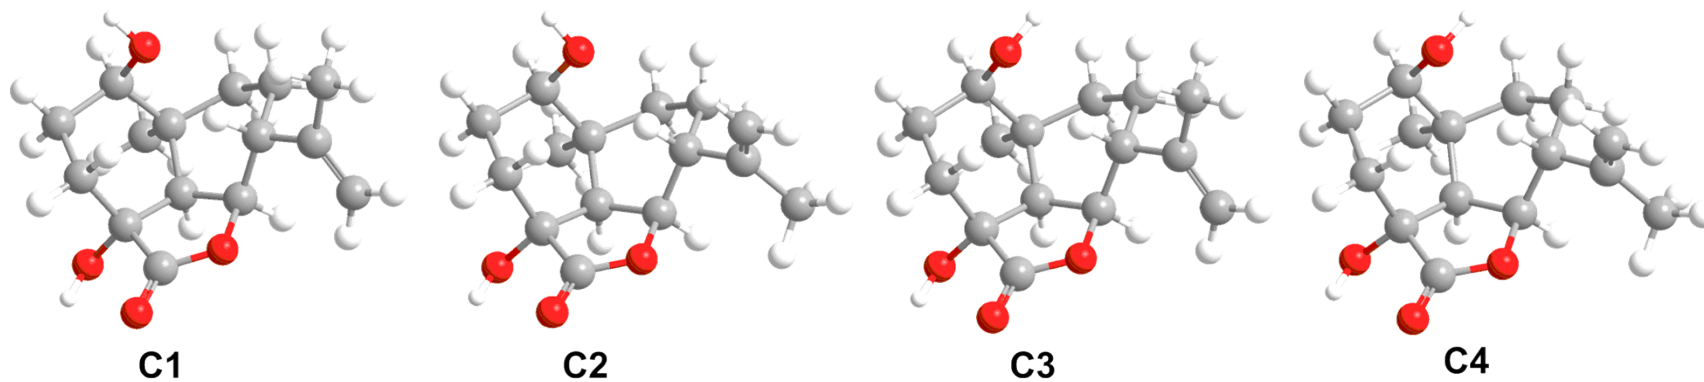

B3LYP/6-31+G(d) optimized lowest energy 3D conformers of **2**

***Energy Analysis Table:***

| Conf.     | MMFF energy       |                        | Gibbs free energy (298.15 K) |                       |                        |
|-----------|-------------------|------------------------|------------------------------|-----------------------|------------------------|
|           | rel. E (Kcal/mol) | Boltzmann Distribution | G (Hartree)                  | $\Delta G$ (Kcal/mol) | Boltzmann Distribution |
| <b>C1</b> | 0.00              | 0.520                  | -885.437704                  | 0.957                 | 0.123                  |
| <b>C2</b> | 0.26              | 0.333                  | -885.439229                  | 0.000                 | 0.621                  |
| <b>C3</b> | 1.10              | 0.082                  | -885.436645                  | 1.621                 | 0.040                  |
| <b>C4</b> | 1.23              | 0.065                  | -885.438228                  | 0.628                 | 0.215                  |

**Calculated ECD data:**

| No | C1                      |                     | No | C2                      |                     | No | C3                      |                     |
|----|-------------------------|---------------------|----|-------------------------|---------------------|----|-------------------------|---------------------|
|    | Excitation energies(eV) | Rotatory Strengths* |    | Excitation energies(eV) | Rotatory Strengths* |    | Excitation energies(eV) | Rotatory Strengths* |
| 1  | 5.5588                  | 3.2774              | 1  | 5.5651                  | 0.6142              | 1  | 5.5629                  | 1.0376              |
| 2  | 5.6236                  | -1.7083             | 2  | 5.65                    | 3.6988              | 2  | 5.6015                  | -0.5449             |
| 3  | 5.9161                  | -7.279              | 3  | 5.9183                  | 5.737               | 3  | 6.0152                  | 9.1321              |
| 4  | 5.9324                  | 12.2887             | 4  | 5.9673                  | -3.4269             | 4  | 6.0411                  | -7.3952             |
| 5  | 6.0889                  | 3.6186              | 5  | 6.1444                  | -4.5373             | 5  | 6.1319                  | -8.0981             |
|    | C4                      |                     |    |                         |                     |    |                         |                     |
| 1  | 5.5682                  | 0.5574              | 1  |                         |                     |    |                         |                     |
| 2  | 5.6565                  | 4.7385              | 2  |                         |                     |    |                         |                     |
| 3  | 6.0326                  | -1.1433             | 3  |                         |                     |    |                         |                     |
| 4  | 6.0591                  | 1.2629              | 4  |                         |                     |    |                         |                     |
| 5  | 6.1595                  | -12.3534            | 5  |                         |                     |    |                         |                     |

\* R(velocity)  $10^{** -40}$  erg-esu-cm

**Ref. 32.** Gaussian 09, Rev. C. 01. Frisch, M. J.; Trucks, G. W.; Schlegel, H. B.; Scuseria, G. E.; Robb, M. A.; Cheeseman, J. R.; Scalmani, G.; Barone, V.; Mennucci, B.; Petersson, G. A.; Nakatsuji, H.; Caricato, M.; Li, X.; Hratchian, H. P.; Izmaylov, A. F.; Bloino, J.; Zheng, G.; Sonnenberg, J. L.; Hada, M.; Ehara, M.; Toyota, K.; Fukuda, R.; Hasegawa, J.; Ishida, M.; Nakajima, T.; Honda, Y.; Kitao, O.; Nakai, H.; Vreven, T.; Montgomery, Jr., J. A.; Peralta, J. E.; Ogliaro, F.; Bearpark, M.; Heyd, J. J.; Brothers, E.; Kudin, K. N.; Staroverov, V. N.; Kobayashi, R.; Normand, J.; Raghavachari, K.; Rendell, A.; Burant, J. C.; Iyengar, S. S.; Tomasi, J.; Cossi, M.; Rega, N.; Millam, J. M.; Klene, M.; Knox, J. E.; Cross, J. B.; Bakken, V.; Adamo, C.; Jaramillo, J.; Gomperts, R.; Stratmann, R. E.; Yazyev, O.; Austin, A. J.; Cammi, R.; Pomelli, C.; Ochterski, J. W.; Martin, R. L.; Morokuma, K.; Zakrzewski, V. G.; Voth, G. A.; Salvador, P.; Dannenberg, J. J.; Dapprich, S.; Daniels, A. D.; Farkas, Ö.; Foresman, J. B.; Ortiz, J. V.; Cioslowski, J.; Fox, D. J. Gaussian, Inc., Wallingford CT, 2009.
